# Supplementary material for: Conserved S-Layer-Associated Proteins Revealed by Exoproteomic Survey of S-Layer-Forming Lactobacilli
Source: PubMed Central journal article supplement (PMC4702614; doi:10.1128/aem.01968-15), 2015-12-22

## **Supplemental Tables and Figure:**

**Supplemental Table 1:** The non-covalently bound exoproteomes of various S-layer and non-S-layer lactobacilli were extracted with LiCl treatment and identified through LC-MS/MS. Strains included: S-layer forming *L. acidophilus*, *L. helveticus*, *L. crispatus*, and *L. amylovorus*; and non-S-layer forming *L. delbrueckii* subsp. *bulgaricus* and *L. casei*. Reported are the UniProt IDs of each identified protein, the molecular weight, and the normalized spectral count.

**Supplemental Table 2:** Putative SLAPs were identified in the non-covalently bound exoproteomes of the S-layer forming strains *L. acidophilus*, *L. helveticus*, *L. amylovorus*, and *L. crispatus*. Reported are the identified proteins, ORF, UniProt ID, molecular weight, identified pfam domains, Amino Acid coverage, and normalized spectral counts.

**Supplemental Figure 1:** To contextualize the transcriptome data, we performed *in silico* analyses in tandem with the RNA-seq to find putative promoter elements in the sequence directly upstream of the SLAP gene regions. Two similar promoter elements were discovered upstream of the *N*-acetylmuramidase (*Nmur*) of region I and the group 3 bacterial Ig-like domain gene (*BIG3*) of region IV. For both promoters the -10 region consisted of a TANAAT consensus motif, while the -35 region followed a NTGTNT consensus motif, in which N represents any nucleotide (A). There was a spacing of 17 nucleotides between the -35 and -10 sites of the *Nmur* promoter, but the spacing was 23 nucleotides for the *BIG3* promoter (B, bolded). Despite this discrepancy, the level of expression was comparable for each gene. In fact, the *BIG3* gene was more highly expressed than *Nmur*, notwithstanding the increased spacing between the -10 and -35 sites (C). The promoters containing the TANAAT and NTGTNT consensus motifs with a spacing of 16 to 23 base pairs in the upstream untranslated regions within the four genomes were curated (8B, non bolded). Numerous housekeeping genes were found to be downstream of the putative

promoters, including the  $\beta$  subunit of RNA polymerase (*rpoB*), initiation factor A (*infA*), cell division protein, *ftsA*, D-lactate dehydrogenase (*ldhD*), the protein translocase subunit, *secA*, enolase (*eno*), *lexA* repressor, and *slpX*. Finally, co-transcriptional analysis using normalized TPM revealed that the 8 housekeeping genes examined had varying levels of expression (C). Distance between the -10 and -35 site did not appear to have any effect on expression. For example, the gene with the highest expression, *eno*, had 20 base pairs between the -10 and -35. Additionally, the *infA* had much higher expression than *rpoB* even though they both had a separation of 16 base pairs between -10 and -35 promoter elements (B).



|                         |     |     |     |     |     |     |     |     |     |
|-------------------------|-----|-----|-----|-----|-----|-----|-----|-----|-----|
| tr C2EMF3 C2E 66 kDa    | 52  | 0   | 0   | 0   | 0   | 0   | 0   | 0   | 0   |
| tr F3MLV0 F3M 65 kDa    | 45  | 38  | 0   | 14  | 108 | 181 | 244 | 27  | 0   |
| tr S5E085 S5E 65 kDa    | 45  | 38  | 0   | 0   | 108 | 158 | 249 | 24  | 0   |
| tr A8YVU4 A8Y 65 kDa    | 39  | 38  | 0   | 0   | 84  | 150 | 226 | 24  | 0   |
| tr FONSB1 FON 66 kDa    | 39  | 40  | 0   | 0   | 65  | 116 | 184 | 24  | 0   |
| tr I7JZC4 I7JZC 48 kDa  | 18  | 29  | 0   | 0   | 5   | 9   | 9   | 34  | 0   |
| tr E4SL67 E4SL 65 kDa   | 13  | 44  | 0   | 0   | 8   | 11  | 9   | 17  | 0   |
| tr I7LEY1 I7LEY 66 kDa  | 12  | 0   | 0   | 0   | 0   | 6   | 7   | 5   | 0   |
| tr FOTF56 FOTF 66 kDa   | 12  | 151 | 0   | 0   | 17  | 25  | 39  | 18  | 1   |
| tr C2KFZ5 C2K 23 kDa    | 6   | 7   | 0   | 0   | 22  | 20  | 25  | 19  | 0   |
| tr I7KGF3 I7KG 65 kDa   | 4   | 0   | 0   | 0   | 16  | 9   | 21  | 2   | 0   |
| tr D5H0E5 D5H 66 kDa    | 2   | 1   | 0   | 12  | 6   | 3   | 7   | 49  | 11  |
| tr G6F4C8 G6F 66 kDa    | 0   | 0   | 0   | 7   | 14  | 9   | 17  | 1   | 0   |
| tr F4ACM2 F4A 66 kDa    | 0   | 0   | 0   | 0   | 7   | 0   | 0   | 3   | 0   |
| tr C2KDX3 C2K 23 kDa    | 0   | 0   | 0   | 4   | 0   | 0   | 0   | 16  | 5   |
| tr KONHV5 KOF 67 kDa    | 0   | 0   | 0   | 0   | 0   | 0   | 17  | 2   | 0   |
| tr C2HQH3 C2I 67 kDa    | 0   | 36  | 0   | 0   | 0   | 0   | 0   | 0   | 0   |
| tr C7XID8 C7X 48 kDa    | 141 | 6   | 0   | 0   | 9   | 7   | 15  | 83  | 17  |
| tr C2EPU3 C2E 47 kDa    | 71  | 5   | 0   | 0   | 9   | 0   | 15  | 33  | 8   |
| tr E4SMC9 E4S 47 kDa    | 62  | 25  | 0   | 0   | 0   | 3   | 11  | 35  | 6   |
| tr C9M3W3 C5 48 kDa     | 34  | 0   | 0   | 0   | 27  | 19  | 35  | 22  | 9   |
| tr FONW69 F0I 48 kDa    | 30  | 9   | 0   | 0   | 4   | 5   | 13  | 18  | 4   |
| tr C2KET8 C2KET 39 kDa  | 136 | 0   | 0   | 0   | 0   | 0   | 0   | 3   | 8   |
| tr C2KGZ0 C2K 22 kDa    | 131 | 17  | 0   | 0   | 1   | 0   | 0   | 83  | 7   |
| tr E4SKN8 E4S 22 kDa    | 56  | 85  | 0   | 0   | 1   | 0   | 1   | 37  | 3   |
| tr C2KBF7 C2KBF 22 kDa  | 130 | 9   | 0   | 0   | 4   | 0   | 0   | 139 | 148 |
| tr D5H257 D5H 44 kDa    | 73  | 70  | 36  | 129 | 16  | 0   | 67  | 33  | 79  |
| tr C9M0F6 C9I 44 kDa    | 48  | 59  | 36  | 129 | 25  | 0   | 86  | 30  | 56  |
| tr S6DLG9 S6D 44 kDa    | 46  | 63  | 10  | 98  | 14  | 0   | 48  | 20  | 44  |
| tr D4YS23 D4Y 44 kDa    | 45  | 25  | 29  | 145 | 5   | 0   | 36  | 7   | 35  |
| tr Q8KMQ9 Q8 28 kDa     | 41  | 8   | 30  | 269 | 0   | 0   | 31  | 0   | 24  |
| sp Q04B37 EF1 44 kDa    | 37  | 8   | 46  | 372 | 1   | 0   | 26  | 18  | 22  |
| sp B3WE38 EF 44 kDa     | 28  | 8   | 136 | 88  | 0   | 0   | 21  | 18  | 18  |
| tr M9T1J1 M9 27 kDa     | 20  | 6   | 31  | 64  | 9   | 0   | 31  | 5   | 20  |
| tr C7XTP2 C7X 44 kDa    | 8   | 6   | 21  | 37  | 0   | 0   | 0   | 0   | 0   |
| tr H1LCP2 H1L 43 kDa    | 1   | 0   | 25  | 29  | 0   | 0   | 0   | 0   | 0   |
| tr J3JB18 J3JB18 44 kDa | 0   | 0   | 28  | 0   | 0   | 0   | 0   | 0   | 0   |
| tr C4RA50 C4R 36 kDa    | 0   | 0   | 111 | 77  | 0   | 0   | 0   | 0   | 0   |
| tr C5J1V4 C5J1 30 kDa   | 0   | 0   | 33  | 117 | 0   | 0   | 13  | 0   | 0   |
| tr C8PAS6 C8P 43 kDa    | 0   | 0   | 17  | 1   | 0   | 0   | 0   | 0   | 0   |
| tr Q599J5 Q59 18 kDa    | 0   | 7   | 8   | 52  | 0   | 0   | 0   | 0   | 0   |
| tr E3SW19 E3S 31 kDa    | 0   | 0   | 111 | 71  | 0   | 0   | 0   | 0   | 0   |
| tr C5J1V9 C5J1 32 kDa   | 0   | 8   | 6   | 15  | 0   | 0   | 0   | 0   | 0   |
| tr G6CGX7 G6C 32 kDa    | 0   | 0   | 22  | 10  | 0   | 0   | 22  | 0   | 0   |
| tr C5J229 C5J2 32 kDa   | 0   | 0   | 111 | 0   | 0   | 0   | 0   | 0   | 0   |
| tr C5J1Y1 C5J1 29 kDa   | 119 | 0   | 0   | 0   | 0   | 0   | 0   | 0   | 0   |
| tr D5H393 D5H3 52 kDa   | 115 | 3   | 2   | 0   | 3   | 0   | 4   | 68  | 38  |
| tr D5GY13 D5G 27 kDa    | 83  | 2   | 1   | 0   | 3   | 0   | 3   | 236 | 111 |
| tr E3RSW0 E3R 27 kDa    | 1   | 0   | 0   | 0   | 0   | 0   | 19  | 4   | 1   |
| tr E4SL88 E4SL 28 kDa   | 0   | 0   | 0   | 0   | 11  | 10  | 257 | 82  | 1   |
| tr J3ZDC4 J3ZC 28 kDa   | 0   | 0   | 0   | 0   | 6   | 12  | 145 | 60  | 1   |
| tr A8YW20 A8Y 25 kDa    | 0   | 0   | 0   | 0   | 6   | 7   | 159 | 63  | 0   |
| tr FONWW5 FON 27 kDa    | 109 | 79  | 7   | 20  | 37  | 16  | 49  | 96  | 10  |
| tr C2KGY6 C2K 18 kDa    | 99  | 66  | 18  | 16  | 46  | 18  | 60  | 89  | 8   |
| sp A8YXK2 RS7 18 kDa    | 35  | 78  | 8   | 20  | 35  | 5   | 30  | 42  | 6   |
| tr I7L13 I7LB: 18 kDa   | 0   | 5   | 120 | 0   | 1   | 0   | 7   | 0   | 0   |
| sp B3WAM3 R 18 kDa      | 0   | 3   | 21  | 0   | 0   | 0   | 0   | 0   | 0   |
| sp Q38UQ8 RS 18 kDa     | 105 | 3   | 0   | 0   | 9   | 12  | 8   | 49  | 12  |
| tr C2KE29 C2K 33 kDa    | 43  | 5   | 0   | 0   | 9   | 18  | 12  | 26  | 5   |
| tr F6CDL2 F6C 33 kDa    | 26  | 3   | 0   | 0   | 18  | 35  | 22  | 20  | 4   |
| tr A4UAEO A4L 33 kDa    | 12  | 0   | 0   | 0   | 0   | 0   | 0   | 0   | 0   |
| tr I7LD71 I7LD 33 kDa   | 101 | 25  | 18  | 18  | 4   | 3   | 5   | 99  | 12  |
| tr C7XHP3 C7X 23 kDa    | 35  | 59  | 18  | 0   | 3   | 0   | 27  | 26  | 4   |
| sp A8YUL2 RS2 23 kDa    | 24  | 5   | 15  | 107 | 0   | 0   | 0   | 24  | 4   |
| sp Q04B92 RS2 24 kDa    | 24  | 37  | 15  | 38  | 0   | 0   | 9   | 24  | 0   |
| tr I7K127 I7K1 23 kDa   | 23  | 6   | 10  | 16  | 0   | 0   | 0   | 30  | 4   |
| tr C4VMR6 C4 23 kDa     | 8   | 0   | 10  | 0   | 0   | 0   | 0   | 7   | 0   |
| tr C8PDK6 C8P 24 kDa    | 97  | 0   | 0   | 0   | 0   | 0   | 0   | 108 | 0   |
| tr C2KGD6 C2K 42 kDa    | 11  | 0   | 0   | 0   | 0   | 0   | 0   | 0   | 0   |
| tr C2D336 C2E 39 kDa    | 94  | 119 | 3   | 0   | 137 | 9   | 51  | 85  | 23  |
| tr C2KFW2 C2I 29 kDa    | 63  | 131 | 7   | 35  | 166 | 13  | 77  | 68  | 17  |
| sp A8YVR9 RS: 29 kDa    | 51  | 87  | 0   | 49  | 78  | 0   | 37  | 40  | 0   |
| sp Q74IR7 RS2 29 kDa    | 33  | 62  | 0   | 29  | 47  | 3   | 29  | 32  | 9   |
| tr I7L8Y7 I7L8Y 29 kDa  | 19  | 50  | 0   | 57  | 58  | 0   | 26  | 0   | 0   |
| tr C4VLA7 C4V 29 kDa    | 13  | 19  | 10  | 0   | 20  | 0   | 0   | 15  | 0   |
| tr COXL13 COXL 30 kDa   | 12  | 34  | 47  | 20  | 25  | 3   | 15  | 16  | 3   |
| sp B3WES8 RS 30 kDa     | 3   | 20  | 6   | 144 | 25  | 3   | 17  | 15  | 1   |
| sp Q049U2 RS 28 kDa     | 0   | 0   | 8   | 12  | 17  | 0   | 0   | 15  | 3   |
| tr H1X5E7 H1X 29 kDa    | 0   | 0   | 11  | 0   | 0   | 0   | 0   | 0   | 0   |
| tr C7XTR6 C7X 29 kDa    | 0   | 34  | 0   | 0   | 0   | 0   | 0   | 0   | 0   |
| tr H4GKR7 H4K 29 kDa    | 95  | 413 | 9   | 0   | 18  | 6   | 8   | 131 | 142 |
| tr F2M168 F2M 62 kDa    | 91  | 391 | 11  | 0   | 19  | 6   | 5   | 131 | 142 |
| tr E4SK12 E4SK 62 kDa   | 91  | 5   | 3   | 5   | 27  | 0   | 68  | 11  | 16  |
| tr C2KCU0 C2K 58 kDa    | 52  | 6   | 3   | 0   | 32  | 0   | 85  | 7   | 9   |
| tr E4SLF6 E4SL 58 kDa   | 40  | 4   | 5   | 0   | 37  | 0   | 138 | 13  | 9   |
| sp A8YTH8 CH 58 kDa     | 38  | 2   | 5   | 0   | 48  | 0   | 154 | 14  | 9   |
| sp O68324 CH 58 kDa     | 32  | 0   | 4   | 0   | 16  | 0   | 53  | 7   | 10  |
| tr C5J3D2 C5J: 20 kDa   | 28  | 0   | 3   | 0   | 19  | 0   | 55  | 4   | 8   |
| tr I7LGV1 I7LG 57 kDa   | 20  | 0   | 1   | 19  | 5   | 0   | 8   | 5   | 7   |
| tr F0JZ61 F0JZ 57 kDa   | 18  | 0   | 5   | 0   | 22  | 0   | 82  | 8   | 7   |
| tr C5J3K2 C5J3 21 kDa   | 12  | 0   | 22  | 0   | 12  | 0   | 30  | 4   | 6   |
| sp B3W9W7 C 57 kDa      | 11  | 0   | 8   | 0   | 12  | 0   | 23  | 0   | 0   |
| tr D7V4Z7 D7V 58 kDa    | 10  | 0   | 8   | 0   | 0   | 0   | 0   | 0   | 0   |
| tr N1ZV35 N1Z 57 kDa    | 8   | 0   | 3   | 1   | 6   | 0   | 17  | 3   | 0   |
| tr B3XQT7 B3X 57 kDa    | 0   | 0   | 8   | 0   | 0   | 0   | 0   | 0   | 0   |
| tr C5J349 C5J3 20 kDa   | 0   | 0   | 0   | 0   | 0   | 11  | 0   | 0   | 0   |

|                        |    |     |    |     |     |     |     |     |     |
|------------------------|----|-----|----|-----|-----|-----|-----|-----|-----|
| tr R9GCH4 R9K 57 kDa   | 0  | 0   | 3  | 0   | 0   | 0   | 18  | 0   | 0   |
| tr Q221H5 Q2: 20 kDa   | 0  | 0   | 0  | 0   | 0   | 0   | 0   | 0   | 0   |
| tr D5GY85 D5C 42 kDa   | 92 | 0   | 0  | 0   | 0   | 0   | 0   | 81  | 99  |
| tr C2KFX7 C2K 42 kDa   | 86 | 0   | 0  | 0   | 0   | 0   | 0   | 80  | 89  |
| tr C2KEW4 C2I 34 kDa   | 66 | 10  | 0  | 0   | 4   | 35  | 21  | 93  | 23  |
| tr FONS42 FON 35 kDa   | 44 | 16  | 0  | 0   | 4   | 99  | 57  | 64  | 17  |
| tr A8YTM0 A8: 30 kDa   | 42 | 0   | 0  | 0   | 4   | 124 | 48  | 63  | 13  |
| tr N2AC72 N2J 45 kDa   | 23 | 19  | 0  | 0   | 0   | 14  | 0   | 25  | 13  |
| tr C7XIX1 C7XI 44 kDa  | 21 | 14  | 0  | 0   | 7   | 24  | 23  | 203 | 96  |
| tr F0TFW7 F0T 44 kDa   | 15 | 137 | 0  | 0   | 0   | 0   | 0   | 44  | 18  |
| tr C7Y7D0 C7Y 42 kDa   | 11 | 38  | 0  | 0   | 0   | 12  | 10  | 43  | 7   |
| tr C9M0W5 C9: 29 kDa   | 0  | 0   | 0  | 0   | 3   | 80  | 63  | 22  | 8   |
| tr E4SNP9 E4S 35 kDa   | 0  | 14  | 0  | 0   | 0   | 18  | 0   | 0   | 0   |
| tr C2EMB2 C2I 46 kDa   | 0  | 53  | 0  | 0   | 0   | 0   | 39  | 0   | 0   |
| tr C2KGY7 C2K 77 kDa   | 88 | 34  | 4  | 136 | 6   | 0   | 38  | 6   | 14  |
| sp Q5FM92 EF 77 kDa    | 71 | 25  | 4  | 134 | 9   | 0   | 46  | 5   | 10  |
| tr C9M229 C9I 77 kDa   | 65 | 25  | 4  | 136 | 9   | 0   | 56  | 6   | 10  |
| tr N1ZQU4 N1: 77 kDa   | 47 | 14  | 4  | 129 | 6   | 0   | 33  | 4   | 7   |
| sp Q04C17 EF: 77 kDa   | 35 | 13  | 5  | 295 | 1   | 0   | 25  | 4   | 7   |
| tr C8PCE5 C8P 77 kDa   | 18 | 12  | 4  | 137 | 0   | 0   | 23  | 4   | 3   |
| tr M5J726 M5: 77 kDa   | 12 | 5   | 7  | 54  | 0   | 0   | 11  | 3   | 0   |
| sp B3WAM2 E 77 kDa     | 3  | 3   | 46 | 25  | 0   | 0   | 2   | 0   | 0   |
| sp B2GDx1 EF: 76 kDa   | 0  | 0   | 5  | 17  | 0   | 0   | 0   | 0   | 0   |
| tr C2EV93 C2E 77 kDa   | 0  | 0   | 0  | 16  | 0   | 0   | 0   | 0   | 0   |
| tr K0NP44 K0N 77 kDa   | 0  | 0   | 0  | 268 | 0   | 0   | 0   | 0   | 0   |
| tr F4FSR5 F4F: 77 kDa  | 0  | 0   | 11 | 32  | 0   | 0   | 0   | 0   | 0   |
| tr F7QRW9 F7: 78 kDa   | 0  | 0   | 0  | 16  | 0   | 0   | 0   | 0   | 0   |
| tr D5H370 D5I 63 kDa   | 75 | 54  | 0  | 18  | 55  | 1   | 123 | 21  | 26  |
| tr C9M016 C9I 63 kDa   | 67 | 65  | 0  | 18  | 62  | 0   | 153 | 22  | 26  |
| tr F0NTCS F0N 64 kDa   | 59 | 64  | 0  | 18  | 58  | 0   | 132 | 21  | 24  |
| tr F6CB49 F6C 63 kDa   | 50 | 59  | 0  | 18  | 47  | 0   | 105 | 16  | 17  |
| tr N2A671 N2: 63 kDa   | 35 | 26  | 0  | 17  | 23  | 0   | 59  | 8   | 14  |
| tr C2KGL0 C2K 44 kDa   | 67 | 70  | 0  | 55  | 27  | 0   | 50  | 12  | 22  |
| tr E4SIH2 E4SI: 44 kDa | 51 | 100 | 1  | 57  | 38  | 0   | 57  | 15  | 15  |
| tr F6CB39 F6C 44 kDa   | 45 | 44  | 0  | 55  | 36  | 0   | 58  | 12  | 15  |
| tr C9M005 C9I 44 kDa   | 42 | 51  | 0  | 39  | 61  | 0   | 87  | 15  | 14  |
| tr C2ESR0 C2E 44 kDa   | 35 | 42  | 0  | 0   | 30  | 0   | 49  | 11  | 14  |
| tr I7IZW0 I7IZ: 44 kDa | 31 | 36  | 0  | 0   | 19  | 0   | 48  | 0   | 11  |
| tr C4VMS3 C4: 44 kDa   | 0  | 7   | 0  | 24  | 0   | 0   | 33  | 0   | 0   |
| tr C8PAP7 C8P 43 kDa   | 0  | 31  | 0  | 0   | 0   | 0   | 0   | 0   | 0   |
| tr E3R1A8 E3R 34 kDa   | 69 | 0   | 0  | 2   | 0   | 0   | 0   | 38  | 8   |
| tr C2EQ10 C2E 34 kDa   | 29 | 1   | 0  | 0   | 0   | 0   | 0   | 19  | 7   |
| tr I7LSJ3 I7LS: 34 kDa | 12 | 0   | 0  | 0   | 0   | 0   | 0   | 4   | 0   |
| tr K0NV95 K0N 34 kDa   | 3  | 0   | 0  | 41  | 0   | 0   | 0   | 3   | 0   |
| tr F0JZ01 F0JZ: 34 kDa | 2  | 0   | 0  | 72  | 0   | 0   | 0   | 2   | 0   |
| tr G6EWB3 G6 34 kDa    | 0  | 0   | 0  | 61  | 0   | 0   | 0   | 0   | 0   |
| tr C2KH58 C2K 58 kDa   | 66 | 74  | 0  | 43  | 124 | 2   | 50  | 73  | 2   |
| tr S5DXP8 S5D 58 kDa   | 54 | 65  | 0  | 43  | 131 | 0   | 55  | 64  | 2   |
| tr F6CD33 F6C 57 kDa   | 53 | 58  | 0  | 39  | 108 | 2   | 47  | 65  | 2   |
| sp Q74L27 SYE 57 kDa   | 34 | 18  | 0  | 40  | 22  | 0   | 22  | 23  | 0   |
| sp Q04853 SYE 57 kDa   | 31 | 17  | 0  | 98  | 20  | 0   | 21  | 24  | 2   |
| tr C8PBH8 C8P 57 kDa   | 29 | 9   | 0  | 33  | 3   | 0   | 15  | 22  | 0   |
| tr K0NQ9 K0I 57 kDa    | 29 | 2   | 0  | 73  | 8   | 0   | 16  | 23  | 0   |
| tr H3RQR7 H3I 58 kDa   | 27 | 0   | 0  | 0   | 0   | 0   | 15  | 0   | 0   |
| sp Q38YY5 SYE 57 kDa   | 26 | 1   | 0  | 34  | 4   | 0   | 15  | 19  | 0   |
| tr G9ZMK3 G9 55 kDa    | 22 | 0   | 0  | 0   | 0   | 0   | 0   | 0   | 0   |
| tr D0DYI6 D0D 57 kDa   | 8  | 9   | 0  | 29  | 3   | 0   | 9   | 6   | 0   |
| tr C2EQZ8 C2E 58 kDa   | 0  | 76  | 0  | 0   | 118 | 0   | 52  | 66  | 0   |
| tr J0L674 J0L6 56 kDa  | 0  | 1   | 0  | 0   | 0   | 0   | 0   | 19  | 0   |
| tr J2Z4L3 J2Z4: 56 kDa | 0  | 0   | 0  | 11  | 0   | 0   | 0   | 0   | 0   |
| tr N1ZE78 N1Z 57 kDa   | 0  | 0   | 0  | 0   | 0   | 0   | 15  | 0   | 0   |
| sp Q03SU7 SYI 57 kDa   | 0  | 0   | 0  | 0   | 0   | 0   | 0   | 19  | 0   |
| tr D5H2U3 D5I 39 kDa   | 67 | 7   | 0  | 0   | 5   | 4   | 4   | 29  | 28  |
| tr R5YL7 R5YII 41 kDa  | 1  | 54  | 0  | 0   | 7   | 14  | 11  | 1   | 1   |
| tr D5H0B8 D5I 92 kDa   | 54 | 32  | 0  | 34  | 63  | 0   | 34  | 18  | 0   |
| tr S5DWM8 S5E 92 kDa   | 50 | 32  | 0  | 23  | 72  | 0   | 43  | 17  | 2   |
| tr C2KCN2 C2K 92 kDa   | 49 | 30  | 0  | 29  | 59  | 0   | 32  | 16  | 0   |
| tr C2ENW0 C2 92 kDa    | 45 | 27  | 0  | 34  | 55  | 0   | 34  | 16  | 0   |
| tr F6CF31 F6CI 92 kDa  | 18 | 18  | 0  | 23  | 45  | 0   | 28  | 11  | 0   |
| tr I7LAM3 I7LA 93 kDa  | 18 | 11  | 0  | 0   | 18  | 0   | 10  | 3   | 0   |
| tr C4VNE1 C4: 92 kDa   | 12 | 6   | 0  | 26  | 14  | 0   | 7   | 0   | 0   |
| tr F0K388 F0K: 92 kDa  | 10 | 4   | 0  | 142 | 5   | 0   | 4   | 2   | 0   |
| tr Q1GC38 Q1: 92 kDa   | 10 | 0   | 0  | 137 | 5   | 0   | 0   | 0   | 0   |
| tr C8PB12 C8P 91 kDa   | 9  | 2   | 0  | 11  | 8   | 0   | 4   | 0   | 0   |
| tr C6VIH5 C6V 95 kDa   | 1  | 0   | 3  | 13  | 0   | 0   | 0   | 2   | 0   |
| tr C2KC97 C2K 47 kDa   | 55 | 21  | 0  | 23  | 22  | 0   | 53  | 14  | 108 |
| tr E4SIA4 E4SI: 47 kDa | 27 | 29  | 0  | 32  | 25  | 0   | 86  | 25  | 42  |
| tr C9M0A5 C9I 47 kDa   | 21 | 15  | 0  | 0   | 28  | 0   | 112 | 10  | 46  |
| sp A8YUV4 EN 47 kDa    | 21 | 15  | 0  | 0   | 28  | 0   | 113 | 10  | 46  |
| sp Q043Z5 EN: 47 kDa   | 19 | 15  | 0  | 28  | 19  | 0   | 58  | 6   | 44  |
| tr I7LAF5 I7LAI 47 kDa | 17 | 15  | 0  | 32  | 19  | 0   | 38  | 0   | 40  |
| tr D5GZY0 D5C 44 kDa   | 53 | 0   | 0  | 0   | 0   | 0   | 0   | 119 | 0   |
| tr C2KF05 C2K 44 kDa   | 52 | 0   | 0  | 0   | 6   | 0   | 0   | 127 | 0   |
| tr E4SND3 E4S 44 kDa   | 22 | 0   | 0  | 0   | 11  | 0   | 0   | 28  | 0   |
| tr I7IVU5 I7IVL 43 kDa | 20 | 0   | 0  | 0   | 0   | 0   | 0   | 0   | 0   |
| tr J7LIA5 J7LIA 44 kDa | 13 | 0   | 0  | 0   | 23  | 0   | 23  | 9   | 0   |
| tr C2KDG2 C2K 47 kDa   | 53 | 0   | 0  | 0   | 0   | 0   | 0   | 24  | 26  |
| tr C2KH12 C2K 13 kDa   | 52 | 17  | 7  | 5   | 0   | 0   | 1   | 41  | 4   |
| tr E4SKZ1 E4SI: 13 kDa | 34 | 26  | 7  | 5   | 0   | 0   | 1   | 30  | 4   |
| tr E4SWH8 E4: 13 kDa   | 13 | 9   | 7  | 13  | 0   | 0   | 0   | 15  | 3   |
| sp B3WAJ4 RS 13 kDa    | 9  | 8   | 59 | 4   | 0   | 0   | 0   | 8   | 2   |
| tr J3JB44 J3JB: 14 kDa | 0  | 0   | 12 | 2   | 0   | 0   | 0   | 4   | 0   |
| tr D5GZ50 D5C 24 kDa   | 47 | 483 | 13 | 1   | 31  | 1   | 2   | 13  | 54  |
| tr A8YWG4 A8 24 kDa    | 7  | 105 | 6  | 0   | 168 | 0   | 1   | 2   | 23  |
| tr J3X9R8 J3X9 24 kDa  | 7  | 105 | 6  | 0   | 124 | 0   | 0   | 0   | 23  |
| tr I7XPU2 I7XP 19 kDa  | 1  | 27  | 0  | 0   | 11  | 0   | 0   | 0   | 2   |

|                        |    |     |    |     |     |     |    |     |     |
|------------------------|----|-----|----|-----|-----|-----|----|-----|-----|
| tr C2KE06 C2K 8 kDa    | 1  | 14  | 0  | 0   | 0   | 0   | 0  | 0   | 7   |
| tr A8YWD2 A8YV 14 kDa  | 45 | 48  | 1  | 17  | 34  | 5   | 8  | 32  | 10  |
| tr D4FE26 D4F 40 kDa   | 41 | 0   | 0  | 0   | 0   | 0   | 0  | 91  | 25  |
| tr C2KB49 C2K 40 kDa   | 29 | 0   | 0  | 0   | 0   | 0   | 0  | 71  | 25  |
| tr C2KGM6 C2 19 kDa    | 42 | 0   | 0  | 0   | 0   | 0   | 0  | 99  | 30  |
| tr K1NFD6 K1 10 kDa    | 38 | 0   | 0  | 0   | 0   | 0   | 0  | 92  | 28  |
| sp A8YXL4 RS1 11 kDa   | 43 | 12  | 0  | 5   | 16  | 15  | 10 | 24  | 5   |
| sp Q04C06 RS: 11 kDa   | 21 | 3   | 0  | 15  | 4   | 7   | 3  | 8   | 1   |
| tr I7J269 I7J26 31 kDa | 40 | 48  | 0  | 0   | 0   | 0   | 0  | 30  | 44  |
| tr F2M1V1 F2I 72 kDa   | 28 | 449 | 0  | 0   | 0   | 173 | 0  | 23  | 20  |
| tr J4BVJ4 J4BV 28 kDa  | 28 | 48  | 0  | 0   | 0   | 0   | 0  | 23  | 20  |
| tr J4BTR2 J4BT 71 kDa  | 0  | 251 | 0  | 0   | 0   | 262 | 0  | 0   | 0   |
| tr F0TGG1 F0T 71 kDa   | 0  | 362 | 0  | 0   | 0   | 120 | 0  | 0   | 0   |
| tr C2EL23 C2EI 72 kDa  | 0  | 22  | 0  | 0   | 0   | 13  | 0  | 0   | 0   |
| tr E4SLY7 E4SL 71 kDa  | 0  | 325 | 0  | 0   | 0   | 125 | 0  | 0   | 0   |
| tr N1Z29 N1ZH 66 kDa   | 38 | 0   | 0  | 0   | 11  | 0   | 5  | 3   | 0   |
| tr C2EQY0 C2E 14 kDa   | 36 | 5   | 0  | 7   | 6   | 0   | 0  | 7   | 2   |
| tr N1ZQQ7 N1 14 kDa    | 18 | 3   | 0  | 7   | 0   | 0   | 0  | 2   | 0   |
| tr A8YTB2 A8Y 14 kDa   | 13 | 2   | 0  | 7   | 9   | 0   | 1  | 3   | 1   |
| tr D5GY60 D5I 97 kDa   | 35 | 16  | 2  | 4   | 21  | 13  | 9  | 17  | 2   |
| sp A8YVQ7 IF2 97 kDa   | 19 | 16  | 2  | 4   | 31  | 21  | 14 | 8   | 2   |
| tr F0TFM5 F0T 97 kDa   | 19 | 22  | 2  | 0   | 21  | 13  | 8  | 8   | 2   |
| tr C9LZ88 C9L 98 kDa   | 19 | 16  | 0  | 0   | 32  | 19  | 14 | 8   | 2   |
| sp Q5FJN6 IF2 98 kDa   | 14 | 11  | 0  | 0   | 14  | 11  | 8  | 8   | 0   |
| tr D4YUU7 D4' 58 kDa   | 13 | 7   | 0  | 2   | 11  | 6   | 6  | 6   | 0   |
| tr C2KCN9 C2K 34 kDa   | 35 | 3   | 0  | 0   | 2   | 0   | 2  | 73  | 2   |
| tr C2ENV2 C2E 34 kDa   | 21 | 3   | 0  | 0   | 0   | 0   | 0  | 62  | 0   |
| tr C2KGZ5 C2K 25 kDa   | 33 | 25  | 2  | 9   | 9   | 13  | 9  | 39  | 7   |
| tr C2EQV3 C2E 25 kDa   | 30 | 25  | 0  | 0   | 0   | 0   | 9  | 35  | 0   |
| sp A8YXL1 RS3 25 kDa   | 26 | 30  | 2  | 12  | 10  | 20  | 12 | 27  | 7   |
| tr E4SKX3 E4SI 25 kDa  | 26 | 36  | 0  | 12  | 11  | 14  | 9  | 33  | 7   |
| tr F0JZ3 F0JZ: 25 kDa  | 7  | 23  | 7  | 58  | 5   | 5   | 4  | 12  | 4   |
| sp Q034Y9 RS: 25 kDa   | 0  | 0   | 50 | 7   | 0   | 0   | 1  | 2   | 1   |
| tr D5HOT3 D5I 49 kDa   | 34 | 21  | 0  | 0   | 151 | 80  | 24 | 157 | 3   |
| tr J7LHE7 J7LH 39 kDa  | 0  | 0   | 0  | 0   | 0   | 0   | 0  | 0   | 0   |
| tr F3ML23 F3M 42 kDa   | 34 | 0   | 0  | 0   | 16  | 187 | 4  | 40  | 0   |
| tr S5DTK6 S5D 41 kDa   | 0  | 0   | 0  | 0   | 20  | 200 | 6  | 24  | 0   |
| tr C9M1B8 C9I 41 kDa   | 0  | 0   | 0  | 0   | 17  | 174 | 0  | 24  | 0   |
| tr C2KB82 C2K 42 kDa   | 33 | 0   | 0  | 0   | 0   | 1   | 0  | 4   | 0   |
| tr A8Y24 A8Y 41 kDa    | 12 | 0   | 0  | 0   | 0   | 2   | 0  | 0   | 0   |
| tr A8YVY6 A8Y 44 kDa   | 33 | 0   | 0  | 0   | 64  | 70  | 82 | 100 | 31  |
| tr J3XA08 J3XA 43 kDa  | 31 | 9   | 0  | 0   | 3   | 36  | 44 | 76  | 17  |
| tr F0NRS9 F0N 45 kDa   | 0  | 0   | 0  | 0   | 14  | 50  | 66 | 98  | 31  |
| tr C7XL73 C7X 13 kDa   | 28 | 31  | 1  | 3   | 22  | 1   | 6  | 12  | 0   |
| tr E4SKY3 E4SI 13 kDa  | 14 | 60  | 1  | 0   | 24  | 1   | 4  | 2   | 0   |
| tr D8FPG0 D8F 13 kDa   | 8  | 4   | 4  | 14  | 0   | 0   | 0  | 5   | 0   |
| sp Q04B29 RL1 13 kDa   | 6  | 0   | 4  | 14  | 0   | 0   | 0  | 4   | 0   |
| tr F4FSP7 F4F: 13 kDa  | 2  | 10  | 5  | 0   | 8   | 0   | 0  | 1   | 0   |
| tr C9M247 C9I 13 kDa   | 0  | 0   | 0  | 0   | 33  | 3   | 8  | 0   | 0   |
| tr C2KBZ5 C2K 46 kDa   | 30 | 12  | 0  | 7   | 9   | 4   | 2  | 16  | 0   |
| tr D5H2J7 D5I 46 kDa   | 24 | 17  | 0  | 0   | 11  | 0   | 4  | 8   | 0   |
| sp Q5FKW9 Tt 46 kDa    | 24 | 12  | 0  | 0   | 11  | 0   | 4  | 8   | 0   |
| tr C9M250 C9I 46 kDa   | 19 | 11  | 0  | 8   | 20  | 6   | 9  | 8   | 0   |
| tr D5H2B9 D5I 37 kDa   | 29 | 0   | 5  | 279 | 4   | 0   | 11 | 2   | 112 |
| tr F0NUV8 F0N 37 kDa   | 24 | 0   | 5  | 327 | 4   | 0   | 11 | 2   | 71  |
| tr F6CEI9 F6CE 37 kDa  | 8  | 0   | 2  | 81  | 0   | 0   | 6  | 0   | 30  |
| tr KONKE8 KON 37 kDa   | 3  | 0   | 11 | 727 | 4   | 0   | 2  | 2   | 19  |
| tr Q04BH2 Q0: 37 kDa   | 3  | 0   | 8  | 666 | 4   | 0   | 2  | 0   | 18  |
| tr B3WCW4 B: 37 kDa    | 0  | 0   | 36 | 124 | 1   | 0   | 0  | 0   | 1   |
| tr S4PMX9 S4F 36 kDa   | 0  | 0   | 0  | 21  | 0   | 0   | 0  | 0   | 0   |
| tr C7XW46 C7: 36 kDa   | 0  | 0   | 7  | 125 | 0   | 0   | 0  | 0   | 2   |
| tr C2ETG1 C2E 36 kDa   | 0  | 0   | 7  | 121 | 0   | 0   | 0  | 0   | 0   |
| tr K5EN00 K5E 36 kDa   | 0  | 0   | 0  | 48  | 0   | 0   | 0  | 0   | 0   |
| tr N2A0J5 N2A 36 kDa   | 0  | 0   | 7  | 90  | 0   | 0   | 0  | 0   | 18  |
| tr C8P6V4 C8P 36 kDa   | 0  | 0   | 0  | 124 | 0   | 0   | 0  | 0   | 0   |
| tr I7LBT6 I7LB1 36 kDa | 0  | 0   | 0  | 258 | 0   | 0   | 0  | 0   | 0   |
| tr F0K1U9 F0K1L 44 kDa | 28 | 22  | 0  | 162 | 9   | 0   | 23 | 8   | 11  |
| tr C2KD87 C2K 17 kDa   | 23 | 8   | 0  | 0   | 7   | 1   | 3  | 31  | 1   |
| tr N1ZXF5 N1Z 20 kDa   | 7  | 0   | 0  | 0   | 2   | 0   | 1  | 12  | 1   |
| tr F0TGC2 F0T 17 kDa   | 6  | 14  | 0  | 0   | 7   | 2   | 5  | 8   | 1   |
| tr C2HQW2 C2 17 kDa    | 6  | 9   | 0  | 0   | 7   | 2   | 7  | 16  | 0   |
| tr C2KH01 C2K 20 kDa   | 26 | 23  | 0  | 16  | 5   | 0   | 13 | 32  | 11  |
| tr E4SKX9 E4SI 20 kDa  | 25 | 38  | 0  | 16  | 5   | 0   | 14 | 28  | 10  |
| sp A8YXL7 RL5 20 kDa   | 23 | 30  | 0  | 0   | 0   | 0   | 11 | 17  | 7   |
| tr C9M243 C9I 20 kDa   | 19 | 27  | 0  | 19  | 7   | 0   | 18 | 25  | 7   |
| sp Q04C03 RL: 20 kDa   | 3  | 8   | 1  | 42  | 6   | 0   | 7  | 12  | 5   |
| tr D0DFA9 D0I 29 kDa   | 26 | 0   | 0  | 6   | 0   | 0   | 0  | 5   | 0   |
| tr G6EUB5 G6I 29 kDa   | 1  | 2   | 0  | 36  | 0   | 0   | 0  | 0   | 0   |
| tr F0K1S4 F0K: 25 kDa  | 0  | 2   | 0  | 47  | 0   | 0   | 0  | 0   | 0   |
| sp A8YXM9 RS 14 kDa    | 25 | 26  | 25 | 24  | 0   | 3   | 0  | 21  | 1   |
| sp Q04B20 RS: 14 kDa   | 14 | 22  | 26 | 36  | 0   | 1   | 0  | 11  | 0   |
| sp B3WAJ3 RS 14 kDa    | 14 | 23  | 43 | 24  | 0   | 0   | 0  | 11  | 0   |
| tr I7IVC9 I7IVC 14 kDa | 4  | 3   | 16 | 9   | 0   | 0   | 0  | 0   | 0   |
| tr G2KVVW7 G2 11 kDa   | 0  | 0   | 15 | 0   | 0   | 0   | 0  | 0   | 0   |
| tr J0KYU7 J0KY 14 kDa  | 0  | 20  | 19 | 0   | 0   | 1   | 0  | 10  | 0   |
| sp B2GUU4 RS 14 kDa    | 0  | 0   | 12 | 0   | 0   | 0   | 0  | 0   | 0   |
| tr C2KD46 C2K 25 kDa   | 25 | 0   | 0  | 0   | 0   | 0   | 0  | 26  | 23  |
| sp A8YXK5 RL3 23 kDa   | 24 | 25  | 0  | 50  | 0   | 0   | 0  | 19  | 0   |
| sp Q04C15 RL: 23 kDa   | 11 | 17  | 0  | 74  | 0   | 0   | 0  | 17  | 0   |
| tr C2KD3 C2KD' 43 kDa  | 23 | 0   | 0  | 0   | 0   | 0   | 0  | 100 | 93  |
| tr C2KH08 C2K 16 kDa   | 22 | 11  | 11 | 0   | 1   | 0   | 0  | 4   | 0   |
| tr E4SKY6 E4SI 16 kDa  | 20 | 13  | 11 | 0   | 0   | 0   | 0  | 4   | 0   |
| tr B3WAJ9 B3 15 kDa    | 18 | 9   | 50 | 4   | 0   | 0   | 0  | 3   | 2   |
| tr A8YW12 A8' 44 kDa   | 22 | 0   | 0  | 0   | 0   | 194 | 0  | 16  | 21  |
| tr F0NRL3 F0N 44 kDa   | 14 | 0   | 0  | 0   | 0   | 182 | 0  | 12  | 17  |
| tr D5H0V9 D5H0 13 kDa  | 21 | 0   | 0  | 0   | 0   | 0   | 0  | 6   | 17  |

|                          |    |     |    |     |     |     |     |     |    |
|--------------------------|----|-----|----|-----|-----|-----|-----|-----|----|
| sp Q04C18 RS: 18 kDa     | 21 | 60  | 8  | 102 | 34  | 2   | 11  | 22  | 4  |
| tr D5H2N6 D5: 76 kDa     | 20 | 23  | 0  | 0   | 2   | 5   | 3   | 13  | 29 |
| tr R5YYL2 R5Y: 79 kDa    | 6  | 82  | 0  | 0   | 3   | 14  | 9   | 3   | 5  |
| tr J3ZET6 J3ZE: 79 kDa   | 5  | 23  | 0  | 0   | 3   | 52  | 17  | 5   | 7  |
| tr N2A286 N2: 59 kDa     | 0  | 0   | 0  | 0   | 2   | 10  | 3   | 0   | 0  |
| tr C2EMG0 C2: 80 kDa     | 0  | 16  | 0  | 0   | 0   | 8   | 0   | 0   | 0  |
| tr C9M2W1 C5: 67 kDa     | 0  | 23  | 0  | 0   | 3   | 52  | 19  | 0   | 0  |
| tr C2HNP9 C2: 79 kDa     | 0  | 20  | 0  | 0   | 0   | 23  | 8   | 0   | 9  |
| tr D5HOY4 D5: 30 kDa     | 20 | 0   | 0  | 0   | 14  | 3   | 7   | 14  | 3  |
| tr C9M1R2 C9: 31 kDa     | 9  | 0   | 0  | 2   | 30  | 6   | 22  | 4   | 1  |
| tr E4SKH9 E4S: 30 kDa    | 0  | 0   | 0  | 0   | 9   | 0   | 0   | 0   | 0  |
| tr D5H194 D5: 40 kDa     | 20 | 0   | 0  | 0   | 0   | 0   | 0   | 1   | 0  |
| tr E4SLF0 E4SLF: 28 kDa  | 19 | 413 | 12 | 0   | 1   | 0   | 0   | 0   | 1  |
| tr C2KH06 C2K: 18 kDa    | 17 | 15  | 5  | 0   | 0   | 0   | 0   | 9   | 0  |
| tr D4YTA2 D4Y: 18 kDa    | 14 | 7   | 5  | 0   | 0   | 0   | 0   | 7   | 0  |
| sp Q035A0 RS: 18 kDa     | 6  | 0   | 13 | 0   | 0   | 0   | 0   | 2   | 0  |
| sp A8YVT1 RL1: 13 kDa    | 17 | 6   | 1  | 17  | 0   | 0   | 0   | 9   | 0  |
| sp Q049S3 RL1: 13 kDa    | 8  | 2   | 1  | 32  | 0   | 0   | 0   | 6   | 0  |
| sp A8YXL0 RL2: 13 kDa    | 17 | 26  | 0  | 3   | 2   | 0   | 0   | 19  | 3  |
| tr C7XMZ7 C7: 48 kDa     | 16 | 1   | 0  | 0   | 4   | 10  | 9   | 66  | 3  |
| tr F6CBN0 F6C: 48 kDa    | 14 | 1   | 0  | 0   | 4   | 10  | 8   | 59  | 3  |
| tr A8YU36 A8Y: 48 kDa    | 9  | 1   | 0  | 0   | 8   | 18  | 16  | 42  | 1  |
| tr C2HN29 C2: 48 kDa     | 9  | 3   | 0  | 0   | 5   | 11  | 9   | 39  | 0  |
| tr C2HM25 C2H: 60 kDa    | 16 | 33  | 0  | 0   | 11  | 9   | 7   | 18  | 32 |
| tr D5GZX0 D5: 96 kDa     | 16 | 2   | 0  | 3   | 1   | 0   | 4   | 0   | 0  |
| sp Q10730 AM: 96 kDa     | 0  | 0   | 0  | 0   | 1   | 0   | 22  | 0   | 0  |
| tr E4SNC5 E4S: 96 kDa    | 0  | 4   | 0  | 0   | 0   | 0   | 11  | 0   | 0  |
| tr F3MN74 F3: 96 kDa     | 0  | 0   | 0  | 0   | 0   | 0   | 23  | 0   | 0  |
| tr D5HOV7 D5: 52 kDa     | 15 | 0   | 0  | 0   | 22  | 20  | 30  | 247 | 2  |
| tr C7XKV4 C7X: 52 kDa    | 10 | 0   | 0  | 0   | 35  | 30  | 45  | 234 | 2  |
| tr C9M1N6 C9: 52 kDa     | 5  | 0   | 0  | 0   | 112 | 264 | 253 | 43  | 0  |
| tr A8YX29 A8Y: 52 kDa    | 5  | 0   | 0  | 0   | 95  | 253 | 243 | 45  | 0  |
| tr C2HLZ4 C2H: 52 kDa    | 4  | 0   | 0  | 0   | 13  | 23  | 31  | 83  | 0  |
| tr G6F4C9 G6F: 66 kDa    | 14 | 9   | 0  | 104 | 8   | 22  | 31  | 47  | 1  |
| tr D1YG09 D1: 65 kDa     | 0  | 0   | 0  | 0   | 0   | 14  | 22  | 21  | 0  |
| tr F0K2X6 F0K: 46 kDa    | 13 | 14  | 0  | 238 | 11  | 0   | 23  | 2   | 15 |
| tr K0NFE8 K0N: 47 kDa    | 0  | 15  | 0  | 120 | 16  | 0   | 30  | 0   | 20 |
| sp A8YXK1 RS1: 15 kDa    | 14 | 22  | 14 | 5   | 0   | 0   | 0   | 10  | 0  |
| sp Q04C19 RS: 15 kDa     | 11 | 13  | 14 | 6   | 0   | 0   | 0   | 9   | 0  |
| sp B3WAM4 R: 15 kDa      | 7  | 7   | 42 | 1   | 0   | 0   | 4   | 1   | 1  |
| sp A8YXL2 RL1: 16 kDa    | 14 | 15  | 0  | 8   | 0   | 0   | 4   | 4   | 0  |
| tr C4VM78 C4: 16 kDa     | 11 | 12  | 0  | 0   | 0   | 0   | 0   | 0   | 0  |
| sp Q04C08 RL: 16 kDa     | 6  | 0   | 0  | 31  | 0   | 0   | 1   | 0   | 0  |
| sp B3WDV5 RS4: 23 kDa    | 14 | 8   | 90 | 10  | 2   | 0   | 2   | 2   | 1  |
| tr C7XKV9 C7X: 60 kDa    | 13 | 0   | 0  | 0   | 1   | 4   | 11  | 74  | 12 |
| tr A8YX36 A8Y: 59 kDa    | 6  | 0   | 0  | 0   | 2   | 8   | 22  | 32  | 8  |
| tr I7LFC8 I7LFC: 60 kDa  | 3  | 0   | 0  | 0   | 0   | 0   | 2   | 12  | 3  |
| tr E4SK81 E4S: 60 kDa    | 1  | 0   | 0  | 0   | 0   | 0   | 0   | 17  | 3  |
| tr G6F3U1 G6F: 62 kDa    | 0  | 0   | 0  | 41  | 2   | 0   | 0   | 0   | 0  |
| tr A4UAC4 A4: 60 kDa     | 0  | 0   | 0  | 0   | 0   | 0   | 5   | 17  | 0  |
| tr F6CFM6 F6C: 61 kDa    | 0  | 0   | 0  | 0   | 0   | 0   | 0   | 17  | 0  |
| tr F0JZE1 F0JZ: 26 kDa   | 0  | 0   | 0  | 10  | 0   | 0   | 0   | 0   | 0  |
| tr R1B2Q0 R1E: 60 kDa    | 0  | 0   | 0  | 37  | 0   | 0   | 0   | 1   | 0  |
| tr F6CFM5 F6C: 60 kDa    | 0  | 0   | 0  | 0   | 0   | 0   | 0   | 35  | 0  |
| tr E3RSZ3 E3R: 58 kDa    | 0  | 0   | 0  | 0   | 0   | 0   | 0   | 72  | 0  |
| tr C2KD34 C2K: 76 kDa    | 13 | 0   | 0  | 0   | 0   | 0   | 2   | 6   | 0  |
| tr A8YWB1 A8: 74 kDa     | 2  | 0   | 0  | 0   | 0   | 0   | 11  | 0   | 0  |
| tr G6F6B1 G6F: 74 kDa    | 0  | 0   | 0  | 19  | 0   | 0   | 0   | 0   | 0  |
| tr F0HU57 F0H: 80 kDa    | 0  | 0   | 0  | 12  | 0   | 0   | 0   | 0   | 0  |
| tr C2KGG9 C2K: 34 kDa    | 13 | 3   | 0  | 0   | 17  | 0   | 11  | 0   | 3  |
| tr F6CB50 F6C: 34 kDa    | 6  | 0   | 0  | 0   | 10  | 0   | 5   | 0   | 0  |
| tr E4SIG1 E4S: 34 kDa    | 5  | 4   | 0  | 0   | 7   | 0   | 8   | 0   | 0  |
| tr F0K1T7 F0K: 63 kDa    | 13 | 27  | 0  | 226 | 22  | 0   | 12  | 5   | 5  |
| tr R1CXN4 R1C: 63 kDa    | 11 | 20  | 0  | 192 | 0   | 0   | 6   | 0   | 5  |
| tr C4VMT3 C4: 63 kDa     | 5  | 8   | 3  | 30  | 0   | 0   | 3   | 0   | 0  |
| tr I7KGT9 I7KG: 63 kDa   | 5  | 8   | 2  | 66  | 0   | 0   | 0   | 3   | 3  |
| tr C7XU23 C7X: 52 kDa    | 0  | 0   | 0  | 12  | 0   | 0   | 0   | 0   | 0  |
| tr C4VQ71 C4: 64 kDa     | 0  | 16  | 2  | 60  | 0   | 0   | 0   | 0   | 0  |
| tr C8PAQ7 C8F: 63 kDa    | 0  | 8   | 0  | 40  | 0   | 0   | 0   | 0   | 0  |
| tr G6ES43 G6ES4: 9 kDa   | 13 | 5   | 0  | 49  | 16  | 0   | 1   | 2   | 0  |
| tr C2KGF5 C2K: 60 kDa    | 12 | 0   | 0  | 0   | 0   | 1   | 0   | 15  | 1  |
| tr A8YWM5 A: 60 kDa      | 11 | 0   | 0  | 0   | 0   | 0   | 0   | 12  | 0  |
| tr C2KZ1 C2K: 12 kDa     | 12 | 1   | 0  | 2   | 0   | 0   | 0   | 12  | 3  |
| tr C2KEW1 C2: 50 kDa     | 12 | 0   | 0  | 0   | 0   | 0   | 0   | 0   | 0  |
| sp Q5FJK5 RS1: 10 kDa    | 10 | 13  | 0  | 0   | 0   | 0   | 0   | 8   | 1  |
| sp A8YVT4 RS: 10 kDa     | 7  | 11  | 0  | 0   | 0   | 0   | 0   | 4   | 0  |
| sp B3WEU4 RS: 11 kDa     | 0  | 0   | 50 | 0   | 0   | 0   | 0   | 0   | 0  |
| tr D5GZD1 D5: 61 kDa     | 11 | 27  | 0  | 0   | 0   | 0   | 0   | 8   | 0  |
| tr C7XJ81 C7XJ: 61 kDa   | 10 | 27  | 0  | 0   | 0   | 0   | 0   | 10  | 0  |
| tr C2KEG9 C2K: 61 kDa    | 8  | 35  | 0  | 5   | 0   | 0   | 0   | 12  | 0  |
| tr N2AN03 N2: 36 kDa     | 6  | 22  | 0  | 0   | 0   | 0   | 0   | 3   | 0  |
| tr E4SMF4 E4S: 61 kDa    | 3  | 57  | 0  | 0   | 0   | 0   | 0   | 5   | 0  |
| tr D5GZC7 D5GZ: 20 kDa   | 11 | 0   | 0  | 0   | 0   | 0   | 0   | 15  | 7  |
| tr C2KET7 C2K: 34 kDa    | 11 | 0   | 0  | 4   | 0   | 0   | 0   | 5   | 2  |
| tr D5GYT0 D5GY: 28 kDa   | 11 | 0   | 0  | 0   | 0   | 2   | 1   | 6   | 0  |
| tr F0TIK1 F0TIK1: 20 kDa | 11 | 10  | 0  | 0   | 4   | 0   | 0   | 12  | 8  |
| tr D5H0U5 D5: 45 kDa     | 10 | 0   | 0  | 0   | 6   | 0   | 0   | 84  | 40 |
| tr C7XKU2 C7X: 45 kDa    | 9  | 0   | 0  | 0   | 6   | 0   | 0   | 88  | 37 |
| tr C2KGN9 C2: 80 kDa     | 10 | 0   | 0  | 0   | 18  | 0   | 5   | 2   | 0  |
| tr C2EMZ3 C2E: 81 kDa    | 10 | 0   | 0  | 0   | 0   | 0   | 0   | 0   | 0  |
| tr F0NTA0 F0N: 81 kDa    | 7  | 0   | 0  | 0   | 20  | 3   | 6   | 0   | 0  |
| tr C9LZZ1 C9LZ: 81 kDa   | 7  | 0   | 0  | 0   | 20  | 3   | 6   | 0   | 0  |
| tr F6CB25 F6C: 81 kDa    | 6  | 0   | 0  | 0   | 13  | 2   | 0   | 0   | 0  |
| tr I7KZ24 I7KZ: 80 kDa   | 4  | 0   | 0  | 0   | 14  | 0   | 0   | 1   | 0  |
| tr F0K2V7 F0K: 82 kDa    | 0  | 0   | 0  | 16  | 0   | 0   | 0   | 0   | 0  |
| tr D5GZ67 D5: 92 kDa     | 10 | 0   | 0  | 1   | 0   | 0   | 0   | 0   | 0  |

|                          |   |     |     |     |    |    |    |    |    |
|--------------------------|---|-----|-----|-----|----|----|----|----|----|
| tr C2KC61 C2K 50 kDa     | 9 | 61  | 0   | 0   | 0  | 0  | 24 | 2  | 18 |
| tr E4S162 E4S1 49 kDa    | 7 | 88  | 0   | 1   | 6  | 0  | 28 | 2  | 10 |
| tr C9M0F7 C9I 49 kDa     | 6 | 60  | 0   | 0   | 9  | 0  | 48 | 2  | 9  |
| tr F6CECO F6C1 49 kDa    | 6 | 38  | 0   | 2   | 0  | 0  | 31 | 0  | 9  |
| tr J4B4V2 J4B1 50 kDa    | 6 | 60  | 0   | 0   | 0  | 0  | 36 | 0  | 9  |
| tr C2EMK3 C2I 49 kDa     | 0 | 37  | 0   | 0   | 0  | 0  | 28 | 0  | 8  |
| tr C2KD24 C2K 35 kDa     | 9 | 0   | 0   | 0   | 0  | 0  | 0  | 35 | 9  |
| tr C7Y6B3 C7Y 35 kDa     | 7 | 0   | 0   | 0   | 0  | 0  | 0  | 44 | 10 |
| tr A4ZGW3 A4 28 kDa      | 5 | 0   | 0   | 3   | 0  | 0  | 12 | 0  | 4  |
| tr E4S1M6 E4S 34 kDa     | 8 | 469 | 1   | 0   | 0  | 8  | 1  | 0  | 0  |
| tr S5E507 S5E1 17 kDa    | 4 | 130 | 0   | 0   | 0  | 7  | 0  | 0  | 0  |
| tr A8YWK5 A8 34 kDa      | 0 | 344 | 1   | 0   | 0  | 12 | 0  | 0  | 0  |
| tr C2KBR7 C2K 46 kDa     | 8 | 0   | 5   | 34  | 0  | 0  | 10 | 0  | 1  |
| sp A8YUE3 PG 43 kDa      | 3 | 0   | 4   | 34  | 0  | 0  | 18 | 0  | 0  |
| sp O32756 PG 43 kDa      | 2 | 0   | 4   | 165 | 0  | 0  | 3  | 0  | 0  |
| tr K0NDC7 K0I 43 kDa     | 2 | 0   | 4   | 103 | 0  | 0  | 2  | 0  | 0  |
| sp B3WCW5 P 42 kDa       | 1 | 0   | 18  | 20  | 0  | 0  | 2  | 0  | 0  |
| tr C2EM36 C2I 46 kDa     | 1 | 0   | 4   | 25  | 0  | 0  | 5  | 0  | 0  |
| tr J3JAY7 J3JA1 43 kDa   | 0 | 0   | 0   | 37  | 0  | 0  | 0  | 0  | 0  |
| tr S6BQV5 S6E 42 kDa     | 0 | 0   | 14  | 0   | 0  | 0  | 0  | 0  | 0  |
| sp Q048Z3 SY 97 kDa      | 3 | 1   | 0   | 110 | 1  | 0  | 1  | 0  | 0  |
| sp A8YTB1 RL1 17 kDa     | 8 | 1   | 0   | 0   | 0  | 3  | 1  | 27 | 1  |
| tr E4SL00 E4S1 16 kDa    | 4 | 3   | 0   | 0   | 0  | 0  | 1  | 12 | 1  |
| tr C2KH14 C2K 35 kDa     | 7 | 13  | 4   | 11  | 11 | 0  | 8  | 0  | 4  |
| sp A8YXN0 RP1 35 kDa     | 5 | 12  | 4   | 11  | 14 | 0  | 10 | 3  | 3  |
| sp Q04BY9 RP1 35 kDa     | 4 | 13  | 4   | 87  | 6  | 0  | 7  | 3  | 3  |
| tr M4NK63 M4 26 kDa      | 0 | 0   | 0   | 10  | 0  | 0  | 0  | 0  | 0  |
| tr C2KB43 C2K 66 kDa     | 7 | 0   | 0   | 29  | 1  | 0  | 0  | 0  | 0  |
| tr G6EVW7 G6 66 kDa      | 2 | 0   | 0   | 82  | 0  | 0  | 0  | 0  | 0  |
| tr D6S505 D6S 66 kDa     | 1 | 0   | 0   | 12  | 1  | 0  | 0  | 0  | 0  |
| tr D4FEF2 D4F 13 kDa     | 7 | 0   | 0   | 0   | 0  | 0  | 0  | 31 | 7  |
| tr F0K101 F0K 27 kDa     | 3 | 0   | 0   | 33  | 0  | 6  | 3  | 3  | 1  |
| tr F0JZT5 F0JZ 54 kDa    | 0 | 1   | 0   | 46  | 0  | 0  | 0  | 0  | 0  |
| tr C2KD26 C2K 50 kDa     | 7 | 0   | 0   | 0   | 0  | 0  | 30 | 2  | 4  |
| tr A8YWA4 A8 51 kDa      | 4 | 0   | 0   | 10  | 1  | 0  | 44 | 3  | 3  |
| tr C8PAE9 C8P 50 kDa     | 4 | 0   | 0   | 24  | 0  | 0  | 11 | 1  | 0  |
| tr I7L654 I7L65 50 kDa   | 4 | 0   | 0   | 12  | 0  | 0  | 13 | 1  | 0  |
| sp O32757 TP1S 27 kDa    | 7 | 0   | 0   | 29  | 0  | 0  | 2  | 0  | 2  |
| tr D5GXV7 D5 50 kDa      | 6 | 8   | 0   | 8   | 15 | 0  | 0  | 0  | 5  |
| tr C9LZ15 C9L 50 kDa     | 4 | 9   | 0   | 8   | 24 | 0  | 0  | 0  | 4  |
| tr E4SIH5 E4S1 50 kDa    | 3 | 23  | 0   | 8   | 20 | 0  | 0  | 0  | 3  |
| tr K1M4D1 K1I 55 kDa     | 6 | 4   | 0   | 0   | 0  | 0  | 0  | 38 | 3  |
| tr D5GYZ1 D5C 55 kDa     | 6 | 4   | 0   | 0   | 0  | 0  | 0  | 39 | 1  |
| tr D5GZK5 D5C 66 kDa     | 4 | 0   | 0   | 0   | 0  | 0  | 0  | 7  | 10 |
| sp A8YXL5 RL1 13 kDa     | 6 | 3   | 15  | 3   | 2  | 0  | 3  | 2  | 0  |
| sp B3WAK7 RL 13 kDa      | 4 | 3   | 26  | 4   | 2  | 0  | 2  | 1  | 0  |
| sp Q04C05 RL 13 kDa      | 4 | 3   | 17  | 11  | 2  | 0  | 2  | 1  | 0  |
| tr I7IVD2 I7IVE 13 kDa   | 0 | 0   | 17  | 4   | 2  | 0  | 0  | 1  | 0  |
| tr D4YSL4 D4Y 33 kDa     | 3 | 10  | 0   | 4   | 0  | 0  | 2  | 0  | 4  |
| tr E4SM21 E4S 33 kDa     | 0 | 20  | 0   | 0   | 0  | 0  | 0  | 0  | 0  |
| tr C2HLY2 C2HLY 45 kDa   | 6 | 0   | 0   | 0   | 0  | 0  | 0  | 0  | 0  |
| sp B3WEL7 RS 7 kDa       | 4 | 13  | 106 | 2   | 0  | 0  | 0  | 6  | 1  |
| sp Q88VR5 RS 8 kDa       | 2 | 3   | 70  | 0   | 0  | 0  | 0  | 3  | 0  |
| sp A8YVN1 RS21 7 kDa     | 6 | 12  | 26  | 0   | 0  | 0  | 0  | 14 | 1  |
| sp Q04C10 RL22 13 kDa    | 6 | 7   | 0   | 15  | 2  | 0  | 0  | 4  | 2  |
| tr C2KFW1 C2I 38 kDa     | 5 | 34  | 2   | 0   | 1  | 0  | 1  | 0  | 8  |
| tr RSYS99 RSY 37 kDa     | 4 | 53  | 2   | 0   | 1  | 0  | 1  | 0  | 3  |
| sp A8YVR8 EF1 38 kDa     | 3 | 29  | 0   | 0   | 1  | 0  | 6  | 0  | 2  |
| tr D8FMC0 D8 51 kDa      | 0 | 0   | 0   | 43  | 0  | 0  | 0  | 0  | 0  |
| tr D5GYE1 D5C 34 kDa     | 5 | 0   | 0   | 0   | 0  | 0  | 0  | 0  | 10 |
| tr C7XIX0 C7X1 33 kDa    | 4 | 0   | 0   | 0   | 0  | 0  | 0  | 0  | 11 |
| tr D5GZG0 D5GZ 92 kDa    | 5 | 0   | 0   | 0   | 0  | 0  | 12 | 0  | 0  |
| tr C2KFS1 C2KFS 41 kDa   | 5 | 0   | 0   | 0   | 0  | 0  | 0  | 0  | 0  |
| tr E4S1G8 E4S1 27 kDa    | 0 | 17  | 0   | 0   | 0  | 3  | 1  | 0  | 0  |
| tr C2EN32 C2E 19 kDa     | 5 | 16  | 0   | 0   | 0  | 0  | 0  | 2  | 1  |
| tr E4S1N4 E4S1 20 kDa    | 2 | 17  | 0   | 0   | 0  | 0  | 0  | 0  | 0  |
| sp A8YXN1 RL17 14 kDa    | 5 | 10  | 0   | 0   | 0  | 0  | 0  | 17 | 1  |
| tr E4SM52 E4SM 40 kDa    | 5 | 13  | 0   | 0   | 0  | 0  | 0  | 2  | 0  |
| tr A4ZH27 A4Z 41 kDa     | 5 | 8   | 0   | 0   | 50 | 70 | 69 | 4  | 4  |
| tr F3MPK9 F3I 136 kDa    | 4 | 5   | 0   | 34  | 18 | 0  | 0  | 0  | 0  |
| sp Q04C22 RP1 136 kDa    | 3 | 1   | 1   | 196 | 4  | 0  | 0  | 0  | 0  |
| tr N1ZQV0 N1 136 kDa     | 3 | 5   | 1   | 44  | 13 | 0  | 0  | 0  | 0  |
| tr C6VN61 C6 135 kDa     | 1 | 0   | 7   | 24  | 0  | 0  | 0  | 0  | 0  |
| sp B3WAM8 R 134 kDa      | 1 | 1   | 24  | 20  | 3  | 0  | 0  | 0  | 0  |
| tr I7IZJ9 I7IZJ9 135 kDa | 0 | 5   | 0   | 41  | 11 | 0  | 0  | 0  | 0  |
| tr G9ICP9 G9IC 86 kDa    | 0 | 0   | 11  | 0   | 0  | 0  | 0  | 0  | 0  |
| tr E0YTW7 E0Y 12 kDa     | 0 | 0   | 0   | 28  | 0  | 0  | 0  | 0  | 0  |
| tr F0K366 F0K 59 kDa     | 1 | 2   | 0   | 49  | 0  | 0  | 2  | 0  | 0  |
| tr E4SKC4 E4S1 60 kDa    | 0 | 12  | 0   | 0   | 0  | 0  | 3  | 0  | 0  |
| tr C5F561 C5F 68 kDa     | 3 | 0   | 13  | 0   | 0  | 0  | 1  | 0  | 0  |
| sp Q04BV6 GA 54 kDa      | 3 | 0   | 0   | 17  | 0  | 0  | 3  | 0  | 0  |
| tr D8FNZ3 D8F 35 kDa     | 3 | 0   | 1   | 20  | 0  | 0  | 0  | 0  | 0  |
| sp A8YVX6 RL27 10 kDa    | 4 | 0   | 0   | 0   | 0  | 0  | 0  | 18 | 0  |
| tr C2KGD7 C2KG 27 kDa    | 4 | 0   | 0   | 0   | 0  | 0  | 0  | 2  | 0  |
| tr C8PD72 C8PD 66 kDa    | 4 | 0   | 0   | 0   | 0  | 14 | 18 | 2  | 0  |
| tr A8YWT3 A8 25 kDa      | 4 | 12  | 0   | 0   | 0  | 0  | 1  | 0  | 0  |
| tr E4SM23 E4S 25 kDa     | 0 | 33  | 0   | 0   | 0  | 0  | 0  | 0  | 0  |
| tr F0JZZ9 F0JZZ9 14 kDa  | 4 | 0   | 0   | 19  | 0  | 0  | 0  | 0  | 0  |
| tr F3MNO5 F3MI 20 kDa    | 4 | 0   | 0   | 0   | 0  | 0  | 5  | 4  | 2  |
| tr N2A9R3 N2 69 kDa      | 3 | 4   | 0   | 18  | 0  | 0  | 2  | 0  | 0  |
| tr G6ETM4 G6 69 kDa      | 1 | 0   | 0   | 37  | 0  | 0  | 0  | 0  | 0  |
| tr R1CVP3 R1C 69 kDa     | 1 | 0   | 0   | 31  | 0  | 0  | 0  | 0  | 0  |
| tr F3N086 F3N 62 kDa     | 0 | 0   | 15  | 0   | 0  | 0  | 0  | 0  | 0  |
| tr B3WEZ3 B3 68 kDa      | 0 | 0   | 25  | 1   | 0  | 0  | 0  | 0  | 0  |
| sp Q04BF6 GLI 49 kDa     | 0 | 0   | 0   | 41  | 0  | 0  | 0  | 0  | 0  |
| sp A8YVR3 SYI 63 kDa     | 3 | 9   | 0   | 0   | 89 | 0  | 21 | 2  | 1  |



|                         |   |    |     |     |    |    |    |     |    |
|-------------------------|---|----|-----|-----|----|----|----|-----|----|
| tr E4S1Z9 E4S1: 63 kDa  | 3 | 11 | 0   | 0   | 30 | 0  | 12 | 2   | 1  |
| tr I7JU69 I7JU: 63 kDa  | 0 | 3  | 0   | 5   | 30 | 0  | 7  | 1   | 0  |
| tr D7V3Y9 D7V: 63 kDa   | 0 | 0  | 0   | 5   | 32 | 0  | 6  | 0   | 0  |
| tr C2KF80 C2K: 45 kDa   | 3 | 0  | 0   | 0   | 0  | 0  | 2  | 171 | 30 |
| sp B3WAL8 RS: 12 kDa    | 0 | 2  | 37  | 0   | 0  | 0  | 0  | 0   | 0  |
| sp A5VLK6 RS1: 12 kDa   | 0 | 0  | 24  | 0   | 0  | 0  | 0  | 0   | 0  |
| sp A8YVH1 PP: 34 kDa    | 3 | 0  | 0   | 0   | 0  | 0  | 19 | 0   | 1  |
| tr E4SKF0 E4SKF: 11 kDa | 3 | 17 | 0   | 1   | 2  | 0  | 0  | 3   | 0  |
| tr C2EQL7 C2EQ: 61 kDa  | 3 | 6  | 0   | 0   | 0  | 5  | 4  | 10  | 11 |
| sp Q049V5 IF2: 91 kDa   | 3 | 3  | 0   | 107 | 1  | 2  | 0  | 2   | 0  |
| tr K0NQ12 K0F: 91 kDa   | 0 | 3  | 0   | 30  | 0  | 0  | 0  | 0   | 0  |
| tr F6CFO3 F6CFC: 60 kDa | 3 | 1  | 0   | 0   | 21 | 50 | 0  | 8   | 11 |
| tr E4SW47 E4SW: 33 kDa  | 3 | 11 | 0   | 14  | 3  | 0  | 2  | 0   | 4  |
| tr B5QPS8 B5QP: 7 kDa   | 3 | 0  | 16  | 0   | 0  | 0  | 0  | 0   | 0  |
| tr C5F3S3 C5F: 67 kDa   | 3 | 0  | 40  | 0   | 0  | 0  | 0  | 0   | 0  |
| tr S6C884 S6C: 67 kDa   | 0 | 0  | 16  | 0   | 0  | 0  | 0  | 0   | 0  |
| tr F0K3A3 F0K: 53 kDa   | 3 | 0  | 0   | 58  | 0  | 0  | 0  | 2   | 0  |
| tr F0K1J0 F0K1: 101 kDa | 0 | 0  | 0   | 34  | 0  | 0  | 0  | 0   | 0  |
| tr C5G2X8 C5C: 102 kDa  | 0 | 0  | 0   | 11  | 0  | 0  | 0  | 0   | 0  |
| tr K0NGD5 K0F: 101 kDa  | 0 | 0  | 0   | 26  | 0  | 0  | 0  | 0   | 0  |
| tr D5H154 D5I: 136 kDa  | 2 | 2  | 4   | 4   | 1  | 0  | 0  | 2   | 1  |
| tr F3MPL0 F3N: 136 kDa  | 2 | 2  | 4   | 50  | 2  | 0  | 1  | 2   | 0  |
| sp Q04C21 RP: 136 kDa   | 1 | 0  | 4   | 203 | 1  | 0  | 0  | 1   | 0  |
| tr R9G902 R9C: 136 kDa  | 1 | 0  | 11  | 0   | 0  | 0  | 0  | 0   | 0  |
| sp Q034X1 RP: 136 kDa   | 1 | 0  | 28  | 28  | 0  | 0  | 0  | 1   | 0  |
| tr J2ZQN4 J2Z: 135 kDa  | 0 | 0  | 6   | 22  | 0  | 0  | 0  | 0   | 0  |
| tr K5ENX7 K5E: 135 kDa  | 0 | 0  | 6   | 23  | 0  | 0  | 0  | 2   | 0  |
| tr C2D3G6 C2C: 136 kDa  | 0 | 0  | 6   | 26  | 0  | 0  | 0  | 0   | 0  |
| sp Q03PV0 RP: 136 kDa   | 0 | 0  | 3   | 22  | 0  | 0  | 0  | 0   | 0  |
| tr U2H4H6 U2: 34 kDa    | 0 | 0  | 1   | 8   | 0  | 0  | 0  | 0   | 0  |
| tr I7LDR6 I7LD: 136 kDa | 0 | 2  | 4   | 54  | 1  | 0  | 1  | 0   | 0  |
| tr N1Z3W37 N1: 137 kDa  | 0 | 0  | 8   | 21  | 1  | 0  | 0  | 0   | 0  |
| tr G9ICQ0 G9K: 129 kDa  | 0 | 0  | 16  | 35  | 0  | 0  | 0  | 1   | 0  |
| tr G6CE90 G6C: 136 kDa  | 0 | 0  | 9   | 33  | 0  | 0  | 0  | 0   | 0  |
| tr C7XKU9 C7X: 26 kDa   | 2 | 11 | 0   | 16  | 5  | 0  | 21 | 1   | 6  |
| tr D8FQZ9 D8F: 26 kDa   | 1 | 9  | 2   | 74  | 0  | 0  | 7  | 0   | 4  |
| tr F3MNR7 F3I: 27 kDa   | 0 | 13 | 2   | 16  | 9  | 0  | 25 | 1   | 4  |
| tr C2EH56 C2E: 26 kDa   | 0 | 0  | 1   | 12  | 0  | 0  | 0  | 0   | 0  |
| tr C2ETX9 C2E: 26 kDa   | 0 | 0  | 2   | 0   | 0  | 0  | 5  | 0   | 0  |
| tr B2GF82 B2C: 26 kDa   | 0 | 0  | 0   | 0   | 0  | 0  | 0  | 0   | 0  |
| tr M5J812 M5: 26 kDa    | 0 | 0  | 2   | 16  | 0  | 0  | 0  | 0   | 0  |
| tr S2MVG4 S2I: 9 kDa    | 0 | 0  | 0   | 4   | 0  | 0  | 0  | 0   | 0  |
| tr F2LY24 F2LY: 62 kDa  | 2 | 2  | 0   | 19  | 0  | 0  | 0  | 0   | 0  |
| tr F0K1M3 F0K: 62 kDa   | 1 | 1  | 0   | 69  | 0  | 0  | 0  | 1   | 0  |
| tr C2KKG1 C2K: 34 kDa   | 2 | 5  | 0   | 0   | 6  | 0  | 2  | 0   | 1  |
| tr A8YV24 A8Y: 34 kDa   | 1 | 5  | 0   | 0   | 10 | 0  | 2  | 0   | 0  |
| sp O84913 PEI: 41 kDa   | 1 | 0  | 0   | 0   | 9  | 0  | 12 | 0   | 0  |
| tr F0K0D8 F0K: 103 kDa  | 0 | 0  | 0   | 54  | 0  | 0  | 0  | 0   | 0  |
| tr D8FLW7 D8I: 109 kDa  | 0 | 0  | 0   | 48  | 0  | 0  | 0  | 0   | 0  |
| sp Q04C01 RS: 14 kDa    | 0 | 0  | 0   | 21  | 0  | 0  | 0  | 0   | 0  |
| sp B3WAK4 RS: 15 kDa    | 0 | 0  | 68  | 1   | 0  | 0  | 0  | 0   | 0  |
| sp Q5FIY7 SYFI: 89 kDa  | 1 | 0  | 0   | 0   | 15 | 0  | 3  | 0   | 0  |
| tr C9M4A8 C9I: 89 kDa   | 0 | 0  | 0   | 0   | 37 | 0  | 16 | 0   | 0  |
| tr F0HX11 F0H: 58 kDa   | 2 | 5  | 0   | 50  | 1  | 0  | 3  | 0   | 0  |
| tr F3MFK5 F3N: 60 kDa   | 0 | 7  | 0   | 9   | 10 | 0  | 8  | 0   | 0  |
| tr I7K035 I7K0: 58 kDa  | 0 | 8  | 0   | 17  | 3  | 0  | 2  | 0   | 0  |
| tr J4BT11 J4BT: 60 kDa  | 0 | 10 | 0   | 0   | 0  | 0  | 0  | 0   | 0  |
| sp Q88XW3 RL: 5 kDa     | 0 | 3  | 11  | 7   | 0  | 0  | 0  | 0   | 0  |
| sp Q04BZ2 RL: 4 kDa     | 0 | 2  | 0   | 11  | 0  | 0  | 0  | 0   | 0  |
| tr F0JZF8 F0JZ: 40 kDa  | 0 | 0  | 0   | 37  | 0  | 0  | 2  | 0   | 0  |
| tr C9M1P3 C9I: 40 kDa   | 0 | 0  | 0   | 3   | 0  | 0  | 24 | 0   | 2  |
| tr C2KDN2 C2K: 40 kDa   | 0 | 0  | 0   | 0   | 0  | 0  | 9  | 0   | 11 |
| tr G6F6P4 G6F: 62 kDa   | 2 | 5  | 0   | 66  | 0  | 0  | 0  | 2   | 0  |
| sp B3WEW2 RL2: 7 kDa    | 2 | 2  | 213 | 0   | 0  | 0  | 0  | 1   | 0  |
| tr E4SLC3 E4SLC: 35 kDa | 2 | 10 | 0   | 0   | 3  | 5  | 3  | 7   | 1  |
| tr D8FNG9 D8I: 21 kDa   | 2 | 1  | 0   | 7   | 2  | 0  | 1  | 0   | 0  |
| tr F0K3H7 F0K: 50 kDa   | 2 | 0  | 1   | 301 | 0  | 0  | 4  | 0   | 0  |
| tr R1AZ75 R1A: 50 kDa   | 0 | 0  | 1   | 255 | 0  | 0  | 0  | 0   | 0  |
| tr S2KRL8 S2K: 50 kDa   | 0 | 0  | 1   | 271 | 0  | 0  | 0  | 0   | 0  |
| sp B3WET9 RL: 13 kDa    | 2 | 0  | 33  | 2   | 0  | 0  | 0  | 0   | 0  |
| sp Q03RU8 RL: 14 kDa    | 0 | 0  | 10  | 0   | 0  | 0  | 0  | 0   | 0  |
| tr G2KTK6 G2K: 14 kDa   | 0 | 0  | 10  | 0   | 0  | 0  | 0  | 0   | 0  |
| tr C0YWK9 C0: 13 kDa    | 0 | 0  | 10  | 0   | 0  | 0  | 0  | 0   | 0  |
| sp B3WAK5 RL5: 20 kDa   | 2 | 8  | 15  | 7   | 6  | 0  | 2  | 2   | 3  |
| tr D5GYW3 D5: 73 kDa    | 1 | 6  | 1   | 15  | 15 | 0  | 4  | 0   | 6  |
| tr F0K3K7 F0K: 73 kDa   | 0 | 6  | 1   | 87  | 10 | 0  | 4  | 0   | 2  |
| tr C9M4D5 C9: 74 kDa    | 0 | 9  | 1   | 13  | 34 | 0  | 12 | 0   | 5  |
| tr D8GHG5 D8: 75 kDa    | 0 | 5  | 5   | 16  | 10 | 0  | 4  | 0   | 0  |
| tr E4SLN3 E4S1: 74 kDa  | 0 | 21 | 1   | 14  | 22 | 0  | 6  | 0   | 5  |
| tr I7J152 I7J15: 73 kDa | 0 | 6  | 1   | 12  | 14 | 0  | 3  | 0   | 0  |
| tr F6CDN2 F6C: 73 kDa   | 0 | 9  | 0   | 0   | 15 | 0  | 0  | 0   | 3  |
| tr S2RUS5 S2R: 30 kDa   | 0 | 0  | 3   | 0   | 10 | 0  | 0  | 0   | 0  |
| tr F6CCK8 F6C: 42 kDa   | 1 | 36 | 0   | 0   | 7  | 10 | 2  | 7   | 0  |
| tr A8YWH9 A8: 14 kDa    | 1 | 36 | 0   | 0   | 0  | 0  | 0  | 0   | 0  |
| tr C9M1Y4 C9I: 42 kDa   | 0 | 0  | 0   | 0   | 0  | 10 | 0  | 72  | 1  |
| tr C2KEL5 C2K: 42 kDa   | 0 | 0  | 0   | 0   | 6  | 22 | 2  | 687 | 5  |
| tr A8YWH8 A8: 21 kDa    | 0 | 0  | 0   | 0   | 7  | 10 | 0  | 6   | 0  |
| tr C2KBD5 C2K: 36 kDa   | 1 | 0  | 0   | 0   | 0  | 0  | 0  | 16  | 0  |
| tr G6ETN5 G6E: 68 kDa   | 0 | 0  | 0   | 68  | 0  | 0  | 0  | 0   | 0  |
| tr F2M1R8 F2M: 8 kDa    | 1 | 3  | 0   | 11  | 0  | 0  | 0  | 0   | 0  |
| tr F6CDN6 F6C: 8 kDa    | 0 | 3  | 0   | 14  | 0  | 0  | 0  | 0   | 0  |
| tr C2KC11 C2K: 35 kDa   | 1 | 0  | 0   | 14  | 0  | 0  | 0  | 0   | 0  |
| tr F0K1J4 F0K1: 35 kDa  | 0 | 0  | 0   | 22  | 0  | 0  | 0  | 0   | 0  |
| tr E1NEP4 E1N: 35 kDa   | 0 | 0  | 0   | 0   | 0  | 0  | 0  | 0   | 0  |
| tr E4SK47 E4S1: 48 kDa  | 1 | 0  | 0   | 0   | 0  | 4  | 0  | 23  | 0  |
| tr K1M441 K1I: 46 kDa   | 1 | 12 | 0   | 0   | 0  | 0  | 0  | 517 | 5  |

|                         |   |    |    |     |     |      |      |     |     |
|-------------------------|---|----|----|-----|-----|------|------|-----|-----|
| tr C7XJ17 C7XJ 45 kDa   | 1 | 12 | 0  | 0   | 0   | 0    | 0    | 620 | 2   |
| sp Q04B65 SVI 106 kDa   | 0 | 0  | 0  | 85  | 0   | 0    | 0    | 0   | 0   |
| tr K6RHV8 K6F 105 kDa   | 0 | 0  | 13 | 0   | 0   | 0    | 0    | 0   | 0   |
| sp A8YUK1 ATI 52 kDa    | 1 | 10 | 1  | 41  | 6   | 0    | 32   | 2   | 7   |
| tr Q6RX76 Q6f 41 kDa    | 1 | 7  | 1  | 27  | 5   | 0    | 19   | 0   | 6   |
| sp Q04BA3 AT 52 kDa     | 0 | 9  | 1  | 137 | 6   | 0    | 13   | 2   | 3   |
| sp Q1WUC6 A 51 kDa      | 0 | 9  | 1  | 37  | 4   | 0    | 7    | 0   | 0   |
| tr G6F6T7 G6F 54 kDa    | 0 | 9  | 0  | 125 | 6   | 0    | 13   | 0   | 0   |
| tr I7KI41 I7KI4 52 kDa  | 0 | 10 | 0  | 0   | 0   | 0    | 0    | 0   | 6   |
| tr C9M4G5 C9 178 kDa    | 0 | 0  | 0  | 0   | 0   | 0    | 138  | 1   | 0   |
| tr G8DA68 G8I 179 kDa   | 0 | 0  | 0  | 0   | 0   | 0    | 124  | 0   | 0   |
| tr F6CCI9 F6CC 79 kDa   | 1 | 0  | 0  | 0   | 3   | 0    | 107  | 3   | 0   |
| tr A4ZH30 A4Z 79 kDa    | 0 | 0  | 0  | 0   | 3   | 0    | 223  | 7   | 0   |
| tr D0DZE5 D0f 76 kDa    | 0 | 0  | 0  | 0   | 0   | 0    | 33   | 0   | 0   |
| tr F2M0D7 F2f 44 kDa    | 1 | 7  | 0  | 0   | 9   | 0    | 10   | 0   | 1   |
| tr C9L291 C9L 41 kDa    | 0 | 5  | 0  | 0   | 15  | 0    | 13   | 0   | 1   |
| tr C9M3E6 C9M: 40 kDa   | 1 | 0  | 0  | 0   | 15  | 2    | 21   | 0   | 1   |
| tr C2KGD3 C2k 44 kDa    | 1 | 0  | 0  | 0   | 0   | 0    | 0    | 12  | 0   |
| tr A8YV00 A8YV: 70 kDa  | 1 | 1  | 0  | 1   | 0   | 0    | 11   | 0   | 0   |
| tr S2QGB6 S2c 37 kDa    | 1 | 0  | 14 | 0   | 0   | 0    | 0    | 0   | 0   |
| tr S2NWD1 S2 98 kDa     | 0 | 0  | 24 | 0   | 0   | 0    | 0    | 0   | 0   |
| tr C7TJQ0 C7T: 102 kDa  | 0 | 3  | 15 | 0   | 0   | 0    | 0    | 0   | 0   |
| sp Q04BB3 RF: 41 kDa    | 0 | 1  | 0  | 17  | 2   | 0    | 3    | 0   | 0   |
| tr E4SJB8 E4SJB8 41 kDa | 1 | 38 | 0  | 0   | 0   | 0    | 0    | 0   | 0   |
| tr G6F6V1 G6F 45 kDa    | 1 | 5  | 0  | 57  | 5   | 0    | 0    | 0   | 0   |
| tr K0NQUB K0I 45 kDa    | 0 | 5  | 0  | 45  | 5   | 0    | 0    | 0   | 0   |
| tr F0K100 F0K10 95 kDa  | 1 | 0  | 0  | 16  | 0   | 0    | 0    | 0   | 0   |
| sp Q048T9 RL1_1 25 kDa  | 1 | 0  | 0  | 49  | 0   | 0    | 0    | 0   | 0   |
| tr A8YWA2 A8 36 kDa     | 1 | 2  | 0  | 0   | 10  | 33   | 23   | 6   | 1   |
| tr D8FNZ4 D8F 78 kDa    | 0 | 1  | 0  | 62  | 0   | 0    | 0    | 0   | 0   |
| tr Q1G9W9 Q1 79 kDa     | 0 | 1  | 0  | 63  | 0   | 0    | 0    | 0   | 0   |
| tr S2K8Q1 S2K 78 kDa    | 0 | 1  | 0  | 62  | 0   | 0    | 0    | 0   | 0   |
| tr K0NTQ3 K0f 77 kDa    | 0 | 0  | 0  | 32  | 0   | 0    | 0    | 0   | 0   |
| tr B3WEA5 B3 78 kDa     | 0 | 0  | 13 | 0   | 0   | 0    | 0    | 0   | 0   |
| tr F0K0Q0 F0K 91 kDa    | 0 | 0  | 0  | 12  | 0   | 0    | 0    | 0   | 0   |
| tr E4SX83 E4S: 91 kDa   | 0 | 0  | 0  | 10  | 0   | 0    | 0    | 0   | 0   |
| tr F0JZU5 F0JZ 80 kDa   | 0 | 0  | 0  | 19  | 0   | 0    | 0    | 0   | 0   |
| tr E4SMW8 E4 32 kDa     | 0 | 10 | 0  | 0   | 0   | 0    | 0    | 0   | 0   |
| tr F0HTF0 F0H 211 kDa   | 0 | 0  | 0  | 72  | 0   | 0    | 0    | 0   | 0   |
| tr Q48545 Q4: 212 kDa   | 0 | 0  | 0  | 80  | 0   | 0    | 0    | 0   | 0   |
| tr Q04A74 Q0: 197 kDa   | 0 | 0  | 0  | 82  | 0   | 0    | 0    | 0   | 0   |
| tr F0JZJ7 F0JZJ 75 kDa  | 0 | 0  | 0  | 45  | 0   | 0    | 0    | 0   | 0   |
| tr J4BUL7 J4BUL: 91 kDa | 0 | 0  | 0  | 0   | 0   | 0    | 63   | 1   | 0   |
| tr D8FP97 D8F 33 kDa    | 0 | 0  | 0  | 16  | 0   | 0    | 0    | 0   | 0   |
| sp Q04B11 OB 48 kDa     | 0 | 0  | 0  | 19  | 0   | 0    | 0    | 0   | 0   |
| sp B3WF43 RL20 13 kDa   | 0 | 0  | 54 | 0   | 0   | 0    | 0    | 0   | 0   |
| tr F0K1P0 F0K: 49 kDa   | 0 | 0  | 0  | 244 | 0   | 0    | 0    | 0   | 0   |
| tr G6F6N7 G6F 49 kDa    | 0 | 0  | 0  | 231 | 0   | 0    | 0    | 0   | 0   |
| tr K0NQR3 K0f 49 kDa    | 0 | 0  | 0  | 109 | 0   | 0    | 0    | 0   | 0   |
| tr MSJ752 M5: 49 kDa    | 0 | 0  | 0  | 11  | 0   | 0    | 0    | 0   | 0   |
| tr D8FR00 D8F 47 kDa    | 0 | 0  | 0  | 13  | 0   | 0    | 0    | 0   | 0   |
| tr E4SVW7 E4: 48 kDa    | 0 | 0  | 0  | 11  | 0   | 0    | 0    | 0   | 0   |
| tr F0K1M2 F0K1f 49 kDa  | 0 | 0  | 0  | 48  | 0   | 0    | 0    | 0   | 0   |
| tr H3RS95 H3F 78 kDa    | 0 | 0  | 0  | 48  | 0   | 0    | 0    | 0   | 0   |
| tr F0K120 F0K: 77 kDa   | 0 | 0  | 0  | 176 | 0   | 0    | 0    | 0   | 0   |
| tr C2EHW0 C2 78 kDa     | 0 | 0  | 0  | 50  | 0   | 0    | 0    | 0   | 0   |
| tr S6BTF7 S6B: 80 kDa   | 0 | 0  | 0  | 32  | 0   | 0    | 0    | 0   | 0   |
| tr C4MCM0 C4 45 kDa     | 0 | 0  | 0  | 0   | 37  | 0    | 31   | 2   | 0   |
| tr C2EQR0 C2E 45 kDa    | 0 | 0  | 0  | 0   | 13  | 0    | 8    | 2   | 0   |
| sp Q1G7W2 R 82 kDa      | 0 | 0  | 0  | 64  | 0   | 0    | 0    | 0   | 0   |
| tr D4YSZ7 D4Y 43 kDa    | 0 | 0  | 0  | 12  | 0   | 0    | 0    | 0   | 0   |
| tr F0JYM0 F0J: 44 kDa   | 0 | 0  | 0  | 522 | 0   | 0    | 0    | 0   | 0   |
| tr K0NY49 K0N 44 kDa    | 0 | 0  | 0  | 113 | 0   | 0    | 0    | 0   | 0   |
| tr E7FRA2 E7F: 10 kDa   | 0 | 0  | 12 | 0   | 0   | 0    | 0    | 0   | 0   |
| tr B3WE81 B3: 10 kDa    | 0 | 0  | 64 | 0   | 0   | 0    | 0    | 0   | 0   |
| tr B2GC36 B2C 10 kDa    | 0 | 0  | 13 | 0   | 0   | 0    | 0    | 0   | 0   |
| sp Q04B28 RS5_1 18 kDa  | 0 | 0  | 0  | 17  | 0   | 0    | 0    | 0   | 0   |
| tr K0NM87 K0f 59 kDa    | 0 | 0  | 0  | 11  | 0   | 0    | 0    | 0   | 0   |
| sp Q04BM6 RF 59 kDa     | 0 | 0  | 0  | 18  | 1   | 0    | 0    | 0   | 0   |
| tr G8DA69 G8I 181 kDa   | 0 | 0  | 0  | 0   | 0   | 0    | 68   | 0   | 0   |
| tr F0TIT7 F0Tf 178 kDa  | 0 | 0  | 0  | 0   | 0   | 0    | 52   | 0   | 0   |
| tr J3WLB4 J3W 181 kDa   | 0 | 0  | 0  | 0   | 0   | 0    | 59   | 0   | 0   |
| tr C2EM91 C2f 182 kDa   | 0 | 0  | 0  | 0   | 0   | 0    | 33   | 0   | 0   |
| tr D8FPS7 D8F 28 kDa    | 0 | 0  | 0  | 10  | 0   | 0    | 0    | 0   | 0   |
| tr J7LMD3 J7LMI 33 kDa  | 0 | 0  | 0  | 0   | 13  | 2    | 4    | 0   | 0   |
| sp Q04C14 RL: 23 kDa    | 0 | 0  | 0  | 30  | 0   | 0    | 0    | 0   | 0   |
| sp B3WAL6 RL 22 kDa     | 0 | 0  | 24 | 0   | 0   | 0    | 0    | 0   | 0   |
| tr D8FNX4 D8FN 27 kDa   | 0 | 0  | 0  | 27  | 0   | 0    | 0    | 0   | 0   |
| tr K0NB73 K0NB: 19 kDa  | 0 | 0  | 31 | 0   | 0   | 0    | 0    | 0   | 0   |
| tr E4SJV9 E4SJV 19 kDa  | 0 | 20 | 0  | 0   | 0   | 0    | 0    | 0   | 0   |
| tr D5H065 D5HO 13 kDa   | 0 | 0  | 0  | 0   | 1   | 0    | 0    | 2   | 16  |
| sp Q04CA4 GL 57 kDa     | 0 | 0  | 0  | 67  | 0   | 0    | 0    | 0   | 0   |
| tr C8PBF9 C8PBF 14 kDa  | 0 | 0  | 10 | 0   | 0   | 0    | 0    | 3   | 0   |
| tr K1MOK1 K1MC 13 kDa   | 0 | 0  | 0  | 0   | 0   | 0    | 0    | 0   | 23  |
| tr C9M149 C9f 32 kDa    | 0 | 0  | 0  | 0   | 9   | 1031 | 1216 | 214 | 4   |
| tr C0XKV9 C0X 38 kDa    | 0 | 0  | 0  | 0   | 8   | 874  | 1010 | 132 | 4   |
| tr J7LF58 J7LF: 37 kDa  | 0 | 0  | 0  | 0   | 8   | 743  | 821  | 111 | 0   |
| tr R1B2S0 R1B 37 kDa    | 0 | 0  | 0  | 0   | 2   | 815  | 923  | 94  | 4   |
| tr A8YWG0 A8 35 kDa     | 0 | 38 | 0  | 0   | 0   | 401  | 167  | 220 | 74  |
| tr F0TGF8 F0T: 35 kDa   | 0 | 15 | 0  | 0   | 257 | 30   | 66   | 68  | 77  |
| tr C2KE41 C2K 35 kDa    | 0 | 50 | 0  | 0   | 276 | 47   | 83   | 84  | 113 |
| tr F2M1U8 F2f 35 kDa    | 0 | 38 | 0  | 0   | 296 | 55   | 112  | 241 | 71  |
| tr C2HQZ2 C2f 38 kDa    | 0 | 0  | 0  | 0   | 8   | 0    | 0    | 0   | 0   |
| tr E4SLY4 E4SL 35 kDa   | 0 | 45 | 0  | 0   | 113 | 26   | 57   | 131 | 55  |
| tr F0NSX1 F0N 218 kDa   | 0 | 0  | 0  | 0   | 0   | 0    | 1101 | 53  | 0   |
| tr F6CDX9 F6C 217 kDa   | 0 | 0  | 0  | 0   | 0   | 0    | 880  | 46  | 0   |

|                         |   |     |     |     |     |     |     |     |     |
|-------------------------|---|-----|-----|-----|-----|-----|-----|-----|-----|
| tr F3MPF4 F3h 103 kDa   | 0 | 0   | 0   | 0   | 0   | 0   | 415 | 26  | 0   |
| tr S5DUF9 S5C 31 kDa    | 0 | 0   | 0   | 0   | 414 | 4   | 389 | 92  | 0   |
| tr F3MPS2 F3h 27 kDa    | 0 | 0   | 0   | 0   | 255 | 4   | 315 | 81  | 0   |
| tr A8YWK2 A8YV 35 kDa   | 0 | 0   | 0   | 0   | 0   | 889 | 28  | 0   | 0   |
| tr I7JYF0 I7JYF1 44 kDa | 0 | 0   | 0   | 0   | 15  | 801 | 8   | 0   | 0   |
| tr E4SJM1 E4S 44 kDa    | 0 | 0   | 0   | 0   | 11  | 781 | 7   | 0   | 0   |
| tr C2EP10 C2E 32 kDa    | 0 | 0   | 0   | 0   | 0   | 41  | 0   | 0   | 0   |
| tr A8YXT2 A8Y 54 kDa    | 0 | 0   | 0   | 0   | 1   | 107 | 288 | 34  | 0   |
| tr F3MQ94 F3l 12 kDa    | 0 | 0   | 0   | 0   | 0   | 58  | 178 | 17  | 0   |
| tr J7LME1 J7L 84 kDa    | 0 | 0   | 0   | 0   | 1   | 107 | 308 | 17  | 0   |
| tr F6CF66 F6C1 85 kDa   | 0 | 0   | 0   | 0   | 0   | 93  | 239 | 16  | 0   |
| sp P22294 HVTJ 38 kDa   | 0 | 0   | 0   | 0   | 3   | 472 | 7   | 0   | 0   |
| tr C2FCS9 C2Fi 75 kDa   | 0 | 2   | 496 | 0   | 0   | 0   | 0   | 0   | 0   |
| tr S6CIQ9 S6C1 74 kDa   | 0 | 0   | 6   | 0   | 0   | 0   | 0   | 0   | 0   |
| tr C2JZK8 C2JZ 74 kDa   | 0 | 0   | 56  | 0   | 0   | 0   | 0   | 0   | 0   |
| tr A8YW73 A8 15 kDa     | 0 | 3   | 0   | 0   | 129 | 53  | 94  | 9   | 0   |
| tr C2ENR7 C2E 15 kDa    | 0 | 3   | 0   | 0   | 66  | 32  | 70  | 5   | 0   |
| tr ASVM59 AS 14 kDa     | 0 | 0   | 0   | 0   | 0   | 0   | 0   | 0   | 0   |
| tr F2M071 F2h 15 kDa    | 0 | 19  | 0   | 0   | 46  | 0   | 40  | 0   | 0   |
| tr C2HKG5 C2f 15 kDa    | 0 | 6   | 0   | 0   | 0   | 0   | 42  | 0   | 0   |
| tr E4S99 E4S1 15 kDa    | 0 | 19  | 0   | 0   | 0   | 0   | 0   | 0   | 0   |
| tr F3MP10 F3h 49 kDa    | 0 | 6   | 0   | 0   | 227 | 619 | 573 | 101 | 8   |
| tr J3ZCG6 J3ZC 49 kDa   | 0 | 6   | 0   | 0   | 96  | 614 | 509 | 92  | 0   |
| tr C9M1R7 C9I 34 kDa    | 0 | 0   | 0   | 0   | 76  | 55  | 154 | 45  | 0   |
| tr D5GYW1 D5G 19 kDa    | 0 | 0   | 0   | 0   | 0   | 0   | 0   | 299 | 45  |
| tr D5H0C3 D5H0 33 kDa   | 0 | 0   | 0   | 0   | 0   | 0   | 0   | 337 | 2   |
| tr D5GZ2 D5C 30 kDa     | 0 | 0   | 0   | 0   | 0   | 0   | 0   | 152 | 217 |
| tr D4FH92 D4F 27 kDa    | 0 | 0   | 0   | 0   | 0   | 0   | 0   | 0   | 32  |
| tr C2EQI4 C2E1 31 kDa   | 0 | 0   | 0   | 0   | 0   | 0   | 0   | 11  | 51  |
| tr FOJYT6 FOJY 56 kDa   | 0 | 0   | 0   | 277 | 0   | 0   | 0   | 0   | 0   |
| tr D8FP7 D8F 56 kDa     | 0 | 0   | 0   | 153 | 0   | 0   | 0   | 0   | 0   |
| tr FOHUB3 FOH 56 kDa    | 0 | 0   | 0   | 133 | 0   | 0   | 0   | 0   | 0   |
| tr FOJYI2 FOJY1 30 kDa  | 0 | 0   | 0   | 310 | 0   | 0   | 0   | 0   | 0   |
| tr R1CJD0 R1C 17 kDa    | 0 | 0   | 0   | 150 | 0   | 0   | 0   | 0   | 0   |
| sp B3WF44 RL35 8 kDa    | 0 | 0   | 190 | 0   | 0   | 0   | 0   | 0   | 0   |
| tr E4SW41 E4S 27 kDa    | 0 | 0   | 5   | 265 | 0   | 0   | 0   | 0   | 0   |
| tr G6EV16 G6E 27 kDa    | 0 | 0   | 5   | 209 | 0   | 0   | 0   | 0   | 0   |
| tr K0NPK7 K0N 31 kDa    | 0 | 0   | 2   | 10  | 0   | 0   | 0   | 0   | 0   |
| sp B3WAL2 RL 13 kDa     | 0 | 5   | 224 | 0   | 0   | 0   | 0   | 1   | 0   |
| tr S2UB14 S2U 8 kDa     | 0 | 4   | 56  | 0   | 0   | 0   | 0   | 0   | 0   |
| tr S5DX82 S5D 45 kDa    | 0 | 0   | 0   | 0   | 109 | 41  | 68  | 7   | 0   |
| tr C9M1L3 C9I 48 kDa    | 0 | 0   | 0   | 0   | 93  | 31  | 70  | 7   | 0   |
| tr J4BP45 J4BP 45 kDa   | 0 | 0   | 0   | 0   | 41  | 22  | 39  | 5   | 0   |
| tr F3MNH8 F3 45 kDa     | 0 | 0   | 0   | 0   | 88  | 35  | 86  | 5   | 0   |
| tr A8YX17 A8Y 45 kDa    | 0 | 0   | 0   | 0   | 56  | 34  | 59  | 5   | 0   |
| tr G9ZRC2 G9ZR 38 kDa   | 0 | 0   | 0   | 0   | 0   | 390 | 394 | 51  | 0   |
| tr R5ZEC3 R5Z 54 kDa    | 0 | 174 | 0   | 0   | 0   | 0   | 0   | 0   | 0   |
| tr E4SIN8 E4S1 54 kDa   | 0 | 131 | 0   | 0   | 0   | 0   | 0   | 0   | 0   |
| tr E4SIL2 E4S1 26 kDa   | 0 | 0   | 0   | 0   | 0   | 122 | 0   | 0   | 0   |
| tr C9M1B6 C9I 15 kDa    | 0 | 0   | 0   | 0   | 0   | 11  | 0   | 0   | 0   |
| tr A8YWF8 A8 57 kDa     | 0 | 38  | 0   | 0   | 19  | 20  | 41  | 2   | 0   |
| tr R5YS22 R5Y 57 kDa    | 0 | 47  | 0   | 0   | 12  | 20  | 38  | 2   | 0   |
| tr C2HQZ1 C2F 57 kDa    | 0 | 8   | 0   | 0   | 5   | 3   | 12  | 0   | 0   |
| tr E4SK72 E4SK7 41 kDa  | 0 | 136 | 0   | 0   | 0   | 0   | 0   | 0   | 0   |
| tr A8YWK1 A8YV 39 kDa   | 0 | 0   | 0   | 0   | 2   | 150 | 0   | 0   | 0   |
| tr G6FP1 G6F8 42 kDa    | 0 | 0   | 0   | 126 | 0   | 0   | 0   | 0   | 0   |
| tr FOJYR8 FOJY 33 kDa   | 0 | 0   | 0   | 141 | 0   | 0   | 1   | 0   | 0   |
| sp B3WE58 RL32 7 kDa    | 0 | 4   | 94  | 0   | 0   | 0   | 0   | 0   | 0   |
| tr C9LZ70 C9L 19 kDa    | 0 | 0   | 0   | 0   | 40  | 20  | 26  | 2   | 0   |
| tr F0NSG7 F0N 19 kDa    | 0 | 0   | 0   | 0   | 35  | 21  | 25  | 1   | 0   |
| tr F0K343 F0K34 66 kDa  | 0 | 0   | 0   | 133 | 0   | 0   | 0   | 0   | 0   |
| tr Q048B8 Q0 53 kDa     | 0 | 0   | 0   | 109 | 0   | 0   | 0   | 0   | 0   |
| tr D8FP44 D8F 74 kDa    | 0 | 0   | 0   | 78  | 0   | 0   | 0   | 0   | 0   |
| tr G6F744 G6F 74 kDa    | 0 | 0   | 0   | 98  | 0   | 0   | 0   | 0   | 0   |
| tr F0K061 F0K 74 kDa    | 0 | 0   | 0   | 97  | 0   | 0   | 0   | 0   | 0   |
| tr A4ZH10 A4Z 41 kDa    | 0 | 3   | 0   | 0   | 7   | 46  | 74  | 6   | 0   |
| tr A8YV73 A8Y 41 kDa    | 0 | 0   | 0   | 0   | 5   | 54  | 46  | 5   | 0   |
| sp A8YU15 G6F 50 kDa    | 0 | 4   | 0   | 0   | 2   | 0   | 52  | 3   | 5   |
| tr C2KBW5 C2I 49 kDa    | 0 | 2   | 0   | 0   | 1   | 0   | 16  | 0   | 18  |
| sp B3WDC0 G1 49 kDa     | 0 | 0   | 10  | 0   | 0   | 0   | 0   | 0   | 0   |
| tr N1ZU93 N1 49 kDa     | 0 | 0   | 0   | 0   | 0   | 0   | 13  | 0   | 8   |
| tr D5GZH9 D5 73 kDa     | 0 | 0   | 0   | 0   | 0   | 0   | 0   | 109 | 0   |
| tr C7XKH6 C7X 73 kDa    | 0 | 0   | 0   | 0   | 0   | 0   | 0   | 59  | 0   |
| sp B3WAK8 RS1 10 kDa    | 0 | 0   | 68  | 0   | 0   | 0   | 0   | 0   | 0   |
| sp Q04BA5 AT 55 kDa     | 0 | 3   | 0   | 37  | 8   | 0   | 11  | 0   | 0   |
| tr S5DVE6 S5D 55 kDa    | 0 | 0   | 0   | 16  | 20  | 0   | 23  | 0   | 0   |
| sp Q04L3 ATI 55 kDa     | 0 | 0   | 0   | 17  | 6   | 0   | 9   | 0   | 0   |
| tr D0DEM7 D0 55 kDa     | 0 | 3   | 0   | 22  | 4   | 0   | 12  | 0   | 0   |
| tr S5E0I5 S5E0 21 kDa   | 0 | 0   | 0   | 0   | 15  | 23  | 45  | 6   | 0   |
| tr A8YWD9 A8 21 kDa     | 0 | 0   | 0   | 0   | 14  | 23  | 44  | 6   | 0   |
| tr S5DZM9 S5DZ 28 kDa   | 0 | 9   | 0   | 0   | 52  | 7   | 34  | 0   | 0   |
| sp Q1G9Z4 BG 114 kDa    | 0 | 0   | 0   | 106 | 0   | 0   | 0   | 0   | 0   |
| tr F0K2P6 F0K 114 kDa   | 0 | 0   | 0   | 106 | 0   | 0   | 0   | 0   | 0   |
| tr S2PW45 S2F 48 kDa    | 0 | 0   | 99  | 0   | 0   | 0   | 0   | 0   | 0   |
| tr B5QKE3 B5C 48 kDa    | 0 | 0   | 57  | 0   | 0   | 0   | 0   | 0   | 0   |
| tr B3W6S8 B3I 42 kDa    | 0 | 0   | 97  | 0   | 0   | 0   | 0   | 0   | 0   |
| tr S6C9A8 S6C 41 kDa    | 0 | 0   | 17  | 0   | 0   | 0   | 0   | 0   | 0   |
| tr F0K0F9 F0K 83 kDa    | 0 | 0   | 0   | 97  | 0   | 0   | 0   | 0   | 0   |
| tr F0JZK9 F0JZ 61 kDa   | 0 | 0   | 0   | 105 | 0   | 0   | 0   | 0   | 0   |
| sp Q1GBO2 PY 61 kDa     | 0 | 0   | 0   | 94  | 0   | 0   | 0   | 0   | 0   |
| tr C9M1H5 C9 46 kDa     | 0 | 0   | 0   | 0   | 16  | 36  | 46  | 2   | 0   |
| tr A8YWP5 A8 46 kDa     | 0 | 0   | 0   | 0   | 16  | 40  | 40  | 2   | 0   |
| tr F0JZ25 F0JZ 34 kDa   | 0 | 0   | 0   | 71  | 0   | 0   | 0   | 0   | 0   |
| tr G6F802 G6F 58 kDa    | 0 | 0   | 0   | 70  | 0   | 0   | 0   | 0   | 0   |
| tr E4SVN4 E4S 56 kDa    | 0 | 0   | 0   | 48  | 0   | 0   | 0   | 0   | 0   |
| tr R1B2J2 R1B 58 kDa    | 0 | 0   | 0   | 38  | 0   | 0   | 0   | 0   | 0   |

|                         |   |    |    |    |    |    |    |    |    |
|-------------------------|---|----|----|----|----|----|----|----|----|
| sp Q048U4 RL 18 kDa     | 0 | 1  | 4  | 66 | 0  | 0  | 0  | 0  | 0  |
| tr E45WK5 E45 18 kDa    | 0 | 1  | 4  | 51 | 0  | 0  | 0  | 0  | 0  |
| tr K0NNL1 K0N 18 kDa    | 0 | 1  | 1  | 17 | 0  | 0  | 0  | 0  | 0  |
| tr B3WEY9 B3W 10 kDa    | 0 | 5  | 62 | 0  | 0  | 0  | 0  | 0  | 0  |
| tr FONTU5 F0N 38 kDa    | 0 | 0  | 0  | 0  | 6  | 42 | 21 | 0  | 0  |
| tr F3MKP1 F3H 38 kDa    | 0 | 0  | 0  | 0  | 10 | 34 | 24 | 0  | 0  |
| tr C2KG71 C2KG 140 kDa  | 0 | 0  | 0  | 0  | 0  | 0  | 0  | 77 | 0  |
| tr D8FP85 D8F 69 kDa    | 0 | 0  | 0  | 76 | 0  | 0  | 0  | 0  | 0  |
| tr E45YD1 E45 70 kDa    | 0 | 0  | 0  | 69 | 0  | 0  | 0  | 0  | 0  |
| sp B3WE33 RS2C 9 kDa    | 0 | 5  | 48 | 0  | 0  | 0  | 0  | 0  | 0  |
| tr D8FRA2 D8F 92 kDa    | 0 | 0  | 0  | 36 | 3  | 0  | 0  | 0  | 0  |
| sp A8YUC4 SE 92 kDa     | 0 | 0  | 0  | 10 | 3  | 0  | 1  | 0  | 0  |
| tr F0K210 F0K 90 kDa    | 0 | 2  | 0  | 18 | 3  | 0  | 0  | 0  | 0  |
| tr R1CME9 R1 90 kDa     | 0 | 0  | 0  | 10 | 0  | 0  | 0  | 0  | 0  |
| tr E45IR2 E45IR2 44 kDa | 0 | 62 | 0  | 0  | 0  | 0  | 0  | 0  | 0  |
| tr F0K318 F0K318 88 kDa | 0 | 0  | 0  | 61 | 0  | 0  | 1  | 0  | 0  |
| tr F0K0F8 F0K 88 kDa    | 0 | 0  | 0  | 59 | 0  | 0  | 0  | 0  | 0  |
| sp B3WAL5 RL 12 kDa     | 0 | 0  | 61 | 0  | 0  | 0  | 0  | 0  | 0  |
| tr K6RWM9 K 12 kDa      | 0 | 0  | 48 | 0  | 0  | 0  | 0  | 0  | 0  |
| tr F0JZF2 F0JZ 47 kDa   | 0 | 0  | 0  | 55 | 0  | 0  | 0  | 0  | 0  |
| tr A4UAE7 A4 35 kDa     | 0 | 0  | 1  | 0  | 0  | 0  | 26 | 1  | 4  |
| sp P00343 LD 36 kDa     | 0 | 0  | 11 | 0  | 0  | 0  | 0  | 0  | 0  |
| tr F6CCW2 F6 35 kDa     | 0 | 0  | 1  | 0  | 0  | 0  | 11 | 0  | 6  |
| tr E1NG16 E1N 35 kDa    | 0 | 0  | 0  | 66 | 6  | 0  | 0  | 0  | 0  |
| tr E7DZ3 E7D 35 kDa     | 0 | 66 | 0  | 0  | 0  | 0  | 0  | 1  | 1  |
| sp Q5FMB0 LC 35 kDa     | 0 | 0  | 0  | 69 | 0  | 0  | 0  | 0  | 0  |
| tr G2KWK8 G2 34 kDa     | 0 | 0  | 0  | 60 | 0  | 0  | 0  | 0  | 0  |
| tr M5J615 M5 34 kDa     | 0 | 0  | 0  | 59 | 0  | 0  | 0  | 0  | 0  |
| sp Q049U9 SYP 63 kDa    | 0 | 0  | 0  | 50 | 0  | 0  | 0  | 0  | 0  |
| tr E45K59 E45K5 45 kDa  | 0 | 0  | 0  | 49 | 0  | 0  | 0  | 0  | 0  |
| sp Q049U3 EFTS 37 kDa   | 0 | 0  | 0  | 43 | 0  | 0  | 0  | 0  | 0  |
| tr D8FN26 D8F 51 kDa    | 0 | 0  | 66 | 0  | 0  | 0  | 0  | 0  | 0  |
| tr G6EUG9 G6 39 kDa     | 0 | 0  | 0  | 0  | 45 | 4  | 0  | 2  | 1  |
| tr E45YX8 E45 39 kDa    | 0 | 0  | 0  | 0  | 45 | 0  | 0  | 0  | 0  |
| tr G6F41 G6F4 69 kDa    | 0 | 0  | 0  | 0  | 42 | 4  | 0  | 0  | 0  |
| tr C5F8A4 C5F8A 41 kDa  | 0 | 52 | 0  | 0  | 0  | 0  | 0  | 0  | 0  |
| tr F0K106 F0K10 51 kDa  | 0 | 44 | 0  | 0  | 0  | 0  | 0  | 0  | 0  |
| tr F0NUC1 F0N 41 kDa    | 0 | 0  | 0  | 51 | 0  | 0  | 0  | 0  | 0  |
| tr C9M1L4 C9 41 kDa     | 0 | 0  | 0  | 50 | 0  | 0  | 0  | 0  | 0  |
| tr E45N31 E45 34 kDa    | 0 | 0  | 0  | 0  | 5  | 33 | 8  | 1  | 12 |
| tr C2EM17 C2 34 kDa     | 0 | 0  | 54 | 0  | 0  | 0  | 0  | 0  | 0  |
| tr F0JZJ6 F0JZ 99 kDa   | 0 | 0  | 47 | 0  | 0  | 0  | 0  | 0  | 0  |
| tr E45W33 E45 99 kDa    | 0 | 1  | 0  | 43 | 2  | 0  | 1  | 0  | 0  |
| tr S5DXX8 S5DX 199 kDa  | 0 | 0  | 0  | 43 | 0  | 0  | 1  | 0  | 0  |
| tr B3WE65 B3 63 kDa     | 0 | 0  | 0  | 50 | 0  | 0  | 0  | 0  | 0  |
| tr S2UF9 S2U 60 kDa     | 0 | 0  | 0  | 12 | 0  | 0  | 0  | 0  | 0  |
| sp Q047T2 ML 57 kDa     | 0 | 0  | 0  | 58 | 0  | 0  | 0  | 1  | 0  |
| tr E45Z57 E45Z 56 kDa   | 0 | 0  | 0  | 11 | 0  | 0  | 0  | 0  | 0  |
| tr I7LAM9 I7L 56 kDa    | 0 | 0  | 0  | 52 | 0  | 0  | 0  | 0  | 0  |
| tr F0JZC5 F0JZ 60 kDa   | 0 | 0  | 0  | 14 | 0  | 0  | 0  | 0  | 0  |
| tr F0HUM2 F0 60 kDa     | 0 | 0  | 0  | 5  | 0  | 0  | 0  | 35 | 0  |
| tr F9UN51 F9L 60 kDa    | 0 | 0  | 0  | 0  | 0  | 0  | 0  | 35 | 0  |
| tr G6F7E4 G6F 41 kDa    | 0 | 6  | 42 | 0  | 0  | 0  | 0  | 0  | 0  |
| tr K0NKB0 K0N 41 kDa    | 0 | 15 | 0  | 4  | 26 | 0  | 9  | 0  | 0  |
| sp Q59485 PEI 90 kDa    | 0 | 15 | 0  | 0  | 0  | 0  | 3  | 0  | 0  |
| tr C7XHB2 C7XHI 47 kDa  | 0 | 2  | 0  | 20 | 1  | 4  | 0  | 2  | 0  |
| sp B3WAI1 RL17 14 kDa   | 0 | 0  | 0  | 20 | 0  | 0  | 0  | 0  | 0  |
| sp A8YTF2 RL7 12 kDa    | 0 | 0  | 0  | 41 | 0  | 0  | 0  | 0  | 0  |
| tr F0TIQ0 F0TI 12 kDa   | 0 | 0  | 0  | 0  | 0  | 27 | 0  | 0  | 0  |
| tr F0K0S4 F0K 52 kDa    | 0 | 0  | 0  | 0  | 0  | 24 | 0  | 0  | 0  |
| sp Q1GAN1 SY 64 kDa     | 0 | 0  | 44 | 0  | 0  | 0  | 0  | 0  | 0  |
| tr A8YWJ6 A8 25 kDa     | 0 | 0  | 0  | 45 | 0  | 0  | 0  | 0  | 0  |
| tr F0THV2 F0T 25 kDa    | 0 | 0  | 0  | 46 | 0  | 0  | 0  | 0  | 0  |
| sp B3WAI0 RL 17 kDa     | 0 | 0  | 21 | 0  | 0  | 0  | 0  | 0  | 0  |
| tr K6SL09 K6SL 17 kDa   | 0 | 0  | 12 | 0  | 0  | 0  | 0  | 0  | 0  |
| sp Q1GAB5 PPAK 34 kDa   | 0 | 3  | 0  | 26 | 5  | 0  | 0  | 0  | 0  |
| tr Q04AM9 Q04 37 kDa    | 0 | 2  | 0  | 26 | 2  | 0  | 0  | 0  | 0  |
| sp B3WAH9 R 14 kDa      | 0 | 0  | 32 | 0  | 0  | 0  | 0  | 0  | 0  |
| tr K6R5S2 K6R 14 kDa    | 0 | 0  | 38 | 0  | 0  | 0  | 0  | 0  | 0  |
| tr F0K0W9 F0H 35 kDa    | 0 | 0  | 0  | 0  | 0  | 0  | 38 | 1  | 0  |
| tr B3WD17 B3 66 kDa     | 0 | 0  | 0  | 41 | 0  | 0  | 0  | 0  | 0  |
| tr C2F9X0 C2F9X 50 kDa  | 0 | 0  | 0  | 41 | 0  | 0  | 0  | 0  | 0  |
| tr C9M4A3 C9 33 kDa     | 0 | 0  | 0  | 40 | 0  | 0  | 0  | 0  | 0  |
| tr C2KD36 C2K 33 kDa    | 0 | 0  | 0  | 49 | 0  | 0  | 0  | 0  | 0  |
| tr F0K1H3 F0K 35 kDa    | 0 | 2  | 0  | 0  | 0  | 0  | 31 | 0  | 2  |
| tr E45JTO E45JTO 46 kDa | 0 | 2  | 0  | 3  | 0  | 0  | 12 | 0  | 6  |
| tr F0JYV9 F0JYVS 37 kDa | 0 | 0  | 38 | 0  | 0  | 0  | 0  | 0  | 0  |
| tr F0K0A2 F0K0A 96 kDa  | 0 | 0  | 38 | 0  | 0  | 0  | 0  | 0  | 0  |
| tr A8YU96 A8Y 64 kDa    | 0 | 0  | 28 | 0  | 0  | 0  | 0  | 0  | 0  |
| tr C2KBL1 C2K 63 kDa    | 0 | 0  | 28 | 0  | 0  | 0  | 0  | 0  | 0  |
| tr D8GEE0 D8 34 kDa     | 0 | 0  | 0  | 22 | 0  | 0  | 0  | 0  | 0  |
| tr B3WB22 B3 34 kDa     | 0 | 0  | 0  | 22 | 0  | 0  | 0  | 0  | 0  |
| sp B3W7F8 RL 17 kDa     | 0 | 0  | 11 | 11 | 0  | 0  | 2  | 0  | 0  |
| tr S2N724 S2N 17 kDa    | 0 | 0  | 11 | 0  | 0  | 0  | 0  | 0  | 0  |
| tr F0K056 F0K 88 kDa    | 0 | 0  | 0  | 25 | 0  | 0  | 0  | 0  | 0  |
| tr F0JZE7 F0JZE7 36 kDa | 0 | 0  | 0  | 20 | 0  | 0  | 0  | 0  | 0  |
| tr B3WFA8 B3 77 kDa     | 0 | 0  | 0  | 40 | 0  | 0  | 0  | 0  | 0  |
| tr G6F770 G6F 41 kDa    | 0 | 0  | 0  | 0  | 0  | 0  | 0  | 39 | 0  |
| tr E45XW7 E45 40 kDa    | 0 | 0  | 0  | 0  | 0  | 0  | 0  | 39 | 0  |
| tr F0JZ23 F0JZ 43 kDa   | 0 | 0  | 0  | 35 | 0  | 0  | 0  | 0  | 0  |
| tr R1CXF1 R1C 43 kDa    | 0 | 0  | 33 | 0  | 0  | 0  | 0  | 0  | 0  |
| tr J7LNX2 J7LN 74 kDa   | 0 | 0  | 0  | 43 | 0  | 0  | 0  | 0  | 0  |
| tr F0K1P1 F0K 46 kDa    | 0 | 0  | 0  | 39 | 0  | 0  | 0  | 0  | 0  |
| sp Q03AK4 EN 47 kDa     | 0 | 0  | 24 | 0  | 0  | 0  | 0  | 1  | 0  |
| tr D8FMY1 D8FN 39 kDa   | 0 | 0  | 11 | 0  | 0  | 0  | 0  | 1  | 0  |
| tr F0K1Q5 F0K 49 kDa    | 0 | 0  | 0  | 23 | 0  | 0  | 0  | 0  | 0  |

|                          |   |    |    |    |    |    |    |    |    |
|--------------------------|---|----|----|----|----|----|----|----|----|
| sp B3WAL3 RS 11 kDa      | 0 | 0  | 1  | 33 | 0  | 0  | 0  | 0  | 0  |
| sp Q38UR6 RS 11 kDa      | 0 | 0  | 0  | 32 | 0  | 0  | 0  | 0  | 0  |
| tr FOHXXH1 F0H 47 kDa    | 0 | 0  | 0  | 32 | 0  | 0  | 0  | 0  | 0  |
| sp Q048F6 SY5 49 kDa     | 0 | 0  | 29 | 0  | 0  | 0  | 0  | 0  | 0  |
| tr D8FP51 D8F 43 kDa     | 0 | 0  | 26 | 0  | 0  | 0  | 0  | 0  | 0  |
| tr F0K0B3 F0K 52 kDa     | 0 | 0  | 0  | 0  | 1  | 10 | 21 | 0  | 0  |
| sp B3WAL7 RL 23 kDa      | 0 | 0  | 0  | 20 | 0  | 0  | 0  | 7  | 0  |
| tr C2JY10 C2JY 23 kDa    | 0 | 0  | 0  | 19 | 0  | 0  | 0  | 1  | 0  |
| tr C9M3R2 C9I 82 kDa     | 0 | 0  | 0  | 31 | 0  | 0  | 0  | 0  | 0  |
| tr A8YXN8 A8Y 82 kDa     | 0 | 0  | 0  | 19 | 0  | 0  | 0  | 0  | 0  |
| tr D8FPJ7 D8FI 31 kDa    | 0 | 0  | 21 | 0  | 0  | 0  | 0  | 0  | 0  |
| sp P54262 SYN 50 kDa     | 0 | 0  | 0  | 33 | 0  | 0  | 0  | 0  | 0  |
| tr K0NUN6 K0I 50 kDa     | 0 | 0  | 27 | 0  | 0  | 0  | 0  | 0  | 0  |
| tr B3WAW5 B5 57 kDa      | 0 | 0  | 0  | 34 | 0  | 0  | 0  | 0  | 0  |
| tr F0K3J1 F0K3 28 kDa    | 0 | 0  | 0  | 47 | 0  | 5  | 2  | 0  | 0  |
| tr C5F2U8 C5F2L 77 kDa   | 0 | 0  | 0  | 32 | 3  | 0  | 0  | 0  | 0  |
| tr F0JYK3 F0JYK3 33 kDa  | 0 | 0  | 0  | 0  | 1  | 0  | 0  | 19 | 81 |
| tr F0JZ55 F0JZ55 55 kDa  | 0 | 0  | 26 | 0  | 0  | 0  | 26 | 0  | 0  |
| tr F0JZR4 F0JZR4 39 kDa  | 0 | 0  | 17 | 0  | 0  | 0  | 0  | 0  | 0  |
| tr G6EWR9 G6EV 38 kDa    | 0 | 0  | 18 | 0  | 0  | 0  | 0  | 0  | 0  |
| sp Q048U5 RL7_ 12 kDa    | 0 | 0  | 0  | 0  | 0  | 0  | 14 | 0  | 0  |
| tr F2M2I8 F2M2I 31 kDa   | 0 | 0  | 0  | 22 | 0  | 0  | 0  | 0  | 0  |
| tr K6Q4Z0 K6C 36 kDa     | 0 | 0  | 18 | 0  | 0  | 0  | 0  | 0  | 0  |
| tr B3WAU5 B3 36 kDa      | 0 | 0  | 16 | 0  | 0  | 0  | 0  | 0  | 0  |
| tr S2R7Y4 S2R 19 kDa     | 0 | 0  | 7  | 0  | 0  | 0  | 0  | 0  | 0  |
| tr F0K0B7 F0K 51 kDa     | 0 | 0  | 0  | 28 | 0  | 0  | 0  | 0  | 0  |
| sp B3W8W8 R 6 kDa        | 0 | 0  | 23 | 0  | 0  | 0  | 0  | 0  | 0  |
| tr K6SHA2 K6S 6 kDa      | 0 | 5  | 0  | 0  | 0  | 0  | 15 | 0  | 0  |
| tr F0JY1 F0JY 37 kDa     | 0 | 0  | 4  | 24 | 0  | 0  | 0  | 0  | 0  |
| tr F0HVK2 F0H 33 kDa     | 0 | 0  | 2  | 24 | 0  | 0  | 0  | 0  | 0  |
| sp B3WAK0 RL3C 7 kDa     | 0 | 0  | 4  | 19 | 0  | 0  | 0  | 0  | 0  |
| tr A8YW42 A8 42 kDa      | 0 | 0  | 21 | 0  | 0  | 0  | 0  | 0  | 0  |
| tr A4ZH58 A4Z 43 kDa     | 0 | 0  | 0  | 23 | 0  | 0  | 0  | 0  | 0  |
| tr B3TNN9 B3I 43 kDa     | 0 | 0  | 0  | 0  | 19 | 0  | 0  | 0  | 0  |
| tr B3W6Z3 B3W 82 kDa     | 0 | 0  | 20 | 0  | 0  | 0  | 0  | 0  | 0  |
| tr B3W9U4 B3W 14 kDa     | 0 | 0  | 21 | 0  | 0  | 0  | 0  | 0  | 0  |
| tr F0JY24 F0JY24 113 kDa | 0 | 0  | 24 | 0  | 0  | 0  | 0  | 0  | 0  |
| tr F0K1V4 F0K1V 36 kDa   | 0 | 25 | 0  | 0  | 0  | 0  | 6  | 10 | 1  |
| tr J7LF50 J7LF50 30 kDa  | 0 | 0  | 0  | 27 | 1  | 0  | 1  | 0  | 0  |
| tr S2LZU1 S2LZU 50 kDa   | 0 | 0  | 0  | 2  | 4  | 0  | 0  | 10 | 1  |
| tr B3WEB6 B3W 37 kDa     | 0 | 0  | 0  | 0  | 4  | 0  | 10 | 0  | 0  |
| sp B3WAL0 RL1E 16 kDa    | 0 | 0  | 19 | 0  | 0  | 0  | 0  | 0  | 0  |
| tr E4SIL6 E4SIL6 42 kDa  | 0 | 0  | 15 | 0  | 0  | 0  | 0  | 0  | 0  |
| tr F0JZK2 F0JZK2 31 kDa  | 0 | 20 | 0  | 0  | 0  | 0  | 0  | 0  | 0  |
| tr A8YTM6 A8 57 kDa      | 0 | 0  | 0  | 12 | 0  | 0  | 0  | 0  | 0  |
| tr B3WAW4 B3W 83 kDa     | 0 | 0  | 0  | 18 | 0  | 0  | 0  | 0  | 0  |
| tr B3WEZ1 B3W 11 kDa     | 0 | 0  | 0  | 23 | 0  | 0  | 0  | 0  | 0  |
| tr E4SJU1 E4SJU 19 kDa   | 0 | 0  | 0  | 23 | 0  | 0  | 0  | 0  | 0  |
| tr D8FPV8 D8F 57 kDa     | 0 | 0  | 11 | 0  | 0  | 0  | 0  | 0  | 0  |
| tr F0K1C9 F0K 56 kDa     | 0 | 0  | 11 | 0  | 0  | 0  | 0  | 0  | 0  |
| tr G6F842 G6F 49 kDa     | 0 | 0  | 13 | 0  | 0  | 0  | 0  | 0  | 0  |
| tr F0JY5 F0JY 48 kDa     | 0 | 0  | 13 | 0  | 0  | 0  | 0  | 0  | 0  |
| tr C2FDY3 C2F 100 kDa    | 0 | 0  | 0  | 21 | 0  | 0  | 0  | 0  | 0  |
| sp B3WE34 RS15 10 kDa    | 0 | 0  | 0  | 21 | 0  | 0  | 0  | 0  | 0  |
| tr B3WEB4 B3 85 kDa      | 0 | 0  | 0  | 22 | 0  | 0  | 0  | 0  | 0  |
| tr B5QQY5 B5 85 kDa      | 0 | 0  | 0  | 27 | 0  | 0  | 1  | 0  | 1  |
| tr F0K0S2 F0K 34 kDa     | 0 | 0  | 0  | 21 | 0  | 0  | 0  | 0  | 0  |
| tr D8FNV3 D8FN 39 kDa    | 0 | 0  | 0  | 21 | 0  | 0  | 0  | 0  | 0  |
| tr F0JY78 F0JY78 45 kDa  | 0 | 0  | 0  | 21 | 0  | 0  | 0  | 0  | 0  |
| tr F0K0T6 F0K0T 63 kDa   | 0 | 0  | 0  | 24 | 0  | 0  | 0  | 0  | 0  |
| tr F0NWR2 F0NV 50 kDa    | 0 | 0  | 0  | 24 | 0  | 0  | 0  | 0  | 0  |
| tr F0JY1 F0JY 39 kDa     | 0 | 0  | 0  | 0  | 0  | 0  | 15 | 0  | 0  |
| tr G6EUG1 G6EU 39 kDa    | 0 | 0  | 0  | 0  | 0  | 0  | 11 | 0  | 0  |
| tr D8FQ53 D8F 70 kDa     | 0 | 0  | 0  | 20 | 0  | 0  | 0  | 0  | 0  |
| tr A8YX34 A8Y 50 kDa     | 0 | 0  | 0  | 17 | 0  | 0  | 0  | 0  | 0  |
| tr C2HLZ7 C2H 51 kDa     | 0 | 0  | 0  | 20 | 0  | 0  | 0  | 0  | 0  |
| tr F0JZ14 F0JZ 30 kDa    | 0 | 0  | 0  | 10 | 0  | 0  | 0  | 0  | 0  |
| sp Q04CC7 SY 48 kDa      | 0 | 0  | 0  | 0  | 1  | 18 | 0  | 0  | 0  |
| tr G6F413 G6F 33 kDa     | 0 | 0  | 0  | 18 | 0  | 0  | 0  | 0  | 0  |
| tr G6ESC1 G6E 22 kDa     | 0 | 0  | 0  | 14 | 0  | 0  | 0  | 0  | 0  |
| sp B3WE64 K6PF 34 kDa    | 0 | 0  | 2  | 21 | 0  | 0  | 0  | 0  | 0  |
| tr A8YXH6 A8YX 39 kDa    | 0 | 0  | 0  | 0  | 0  | 0  | 0  | 0  | 22 |
| tr D8FQD7 D8FQ 53 kDa    | 0 | 1  | 0  | 10 | 1  | 0  | 2  | 0  | 0  |
| tr E4SXX2 E4SXX 36 kDa   | 0 | 1  | 0  | 10 | 1  | 0  | 0  | 0  | 0  |
| tr F0HV09 F0HVI 13 kDa   | 0 | 0  | 0  | 0  | 2  | 0  | 12 | 0  | 0  |
| tr F0K0G2 F0K0C 23 kDa   | 0 | 0  | 0  | 0  | 2  | 0  | 12 | 0  | 0  |
| tr F6CCA9 F6CC 27 kDa    | 0 | 0  | 13 | 0  | 0  | 0  | 0  | 0  | 0  |
| sp Q04AY6 DE 49 kDa      | 0 | 0  | 7  | 0  | 0  | 0  | 0  | 0  | 0  |
| tr A8YUD2 A8 64 kDa      | 0 | 0  | 0  | 16 | 2  | 21 | 4  | 0  | 0  |
| tr B3WD80 B3 23 kDa      | 0 | 0  | 16 | 0  | 0  | 0  | 0  | 0  | 0  |
| tr B5QN95 B5 23 kDa      | 0 | 0  | 16 | 0  | 0  | 0  | 0  | 0  | 0  |
| sp Q1GBI6 RL13 16 kDa    | 0 | 0  | 4  | 0  | 0  | 0  | 0  | 0  | 0  |
| tr F6CCE1 F6CC 38 kDa    | 0 | 0  | 19 | 0  | 0  | 0  | 0  | 0  | 0  |
| tr S5DFW2 S5DV 53 kDa    | 0 | 0  | 16 | 0  | 0  | 0  | 0  | 0  | 0  |
| tr C5F593 C5F 47 kDa     | 0 | 0  | 0  | 0  | 7  | 10 | 2  | 0  | 0  |
| tr S6CAD9 S6C 47 kDa     | 0 | 0  | 0  | 5  | 16 | 0  | 1  | 1  | 0  |
| sp Q034Z1 RL29 7 kDa     | 0 | 0  | 0  | 5  | 16 | 0  | 1  | 1  | 0  |
| tr B3W8T5 B3W 27 kDa     | 0 | 0  | 0  | 17 | 0  | 0  | 0  | 0  | 0  |
| tr B3WA57 B3W 21 kDa     | 0 | 0  | 0  | 17 | 0  | 0  | 0  | 0  | 0  |
| tr C9LZK4 C9LZK 18 kDa   | 0 | 0  | 0  | 11 | 0  | 0  | 0  | 0  | 0  |
| tr A4ZGX2 A4Z 50 kDa     | 0 | 0  | 0  | 18 | 0  | 0  | 1  | 0  | 0  |
| tr F0K1B0 F0K 43 kDa     | 0 | 0  | 0  | 13 | 0  | 0  | 0  | 0  | 0  |
| tr D8FRG6 D8F 43 kDa     | 0 | 0  | 0  | 20 | 0  | 0  | 0  | 0  | 0  |
| tr D8FLW5 D8 61 kDa      | 0 | 0  | 0  | 0  | 0  | 0  | 0  | 0  | 0  |
| sp Q1GBJ7 KAI 24 kDa     | 0 | 0  | 0  | 14 | 0  | 0  | 0  | 0  | 0  |
| tr E4SVS1 E4S 27 kDa     | 0 | 0  | 0  | 14 | 1  | 0  | 0  | 0  | 0  |

|                          |   |    |    |    |    |   |    |   |   |
|--------------------------|---|----|----|----|----|---|----|---|---|
| tr A8YWC4 A8 27 kDa      | 0 | 0  | 0  | 17 | 0  | 0 | 1  | 0 | 0 |
| sp B3WAK2 RL1E 13 kDa    | 0 | 0  | 0  | 15 | 0  | 0 | 1  | 0 | 0 |
| tr G6F7Y5 G6F7Y 76 kDa   | 0 | 0  | 0  | 17 | 0  | 0 | 1  | 0 | 0 |
| sp Q1GB17 PC 41 kDa      | 0 | 0  | 0  | 18 | 0  | 0 | 0  | 0 | 0 |
| sp Q04AV4 SYI 49 kDa     | 0 | 0  | 0  | 17 | 0  | 0 | 0  | 0 | 0 |
| sp Q1GAG8 SY 49 kDa      | 0 | 0  | 0  | 16 | 0  | 0 | 0  | 0 | 0 |
| tr F0K0B1 F0K1 41 kDa    | 0 | 0  | 0  | 16 | 0  | 0 | 0  | 0 | 0 |
| sp B3WCW6 TPI 27 kDa     | 0 | 1  | 0  | 13 | 0  | 0 | 0  | 0 | 0 |
| sp P22733 LACY 68 kDa    | 0 | 1  | 0  | 13 | 0  | 0 | 0  | 0 | 0 |
| tr F0K010 F0K01 34 kDa   | 0 | 0  | 0  | 11 | 0  | 0 | 0  | 0 | 0 |
| tr F0K0G5 F0K0C 32 kDa   | 0 | 0  | 0  | 11 | 0  | 0 | 0  | 0 | 0 |
| tr F0K384 F0K38 41 kDa   | 0 | 0  | 0  | 17 | 0  | 0 | 0  | 0 | 0 |
| tr F0K095 F0K1 27 kDa    | 0 | 0  | 0  | 14 | 0  | 0 | 0  | 0 | 0 |
| sp Q1G9C7 SYI 40 kDa     | 0 | 0  | 0  | 0  | 10 | 0 | 0  | 0 | 0 |
| sp Q049X1 APT_ 19 kDa    | 0 | 0  | 0  | 14 | 0  | 0 | 0  | 0 | 0 |
| tr F0K2X2 F0K2X 34 kDa   | 0 | 0  | 0  | 14 | 0  | 0 | 0  | 0 | 0 |
| tr G6F5A7 G6F5/ 41 kDa   | 0 | 0  | 0  | 14 | 0  | 0 | 0  | 0 | 0 |
| tr K6S8B1 K6S8B 14 kDa   | 0 | 0  | 0  | 10 | 0  | 0 | 0  | 0 | 0 |
| tr S5DWF5 S5DV 40 kDa    | 0 | 0  | 1  | 17 | 0  | 0 | 0  | 0 | 0 |
| tr F0K105 F0K10 51 kDa   | 0 | 0  | 0  | 17 | 0  | 0 | 0  | 0 | 0 |
| tr E4T001 E4T1 46 kDa    | 0 | 0  | 0  | 14 | 0  | 0 | 0  | 0 | 0 |
| tr S2KR84 S2K1 46 kDa    | 0 | 0  | 14 | 0  | 0  | 0 | 0  | 0 | 0 |
| tr F0JZK5 F0JZ1 35 kDa   | 0 | 15 | 0  | 0  | 0  | 0 | 0  | 0 | 0 |
| sp P80019 K6PF 34 kDa    | 0 | 0  | 0  | 0  | 0  | 0 | 11 | 0 | 1 |
| sp Q04C00 RL6_ 19 kDa    | 0 | 0  | 0  | 0  | 0  | 0 | 11 | 0 | 0 |
| tr B3W8H8 B3W 33 kDa     | 0 | 0  | 0  | 10 | 1  | 0 | 0  | 0 | 0 |
| tr G6ESP1 G6ESF 45 kDa   | 0 | 0  | 0  | 10 | 1  | 0 | 0  | 0 | 0 |
| tr F2M3J6 F2M3 43 kDa    | 0 | 0  | 0  | 10 | 0  | 0 | 0  | 0 | 0 |
| tr C9M278 C91 51 kDa     | 0 | 0  | 0  | 16 | 0  | 0 | 0  | 0 | 0 |
| tr K0NSC4 K0N 49 kDa     | 0 | 0  | 0  | 15 | 0  | 0 | 0  | 0 | 0 |
| tr F0JZT2 F0JZ 46 kDa    | 0 | 0  | 0  | 24 | 0  | 0 | 0  | 0 | 0 |
| tr F0K011 F0K1 28 kDa    | 0 | 3  | 0  | 17 | 0  | 0 | 0  | 0 | 0 |
| tr G6EV17 G6E 28 kDa     | 0 | 14 | 0  | 0  | 0  | 0 | 0  | 0 | 0 |
| tr F0K0K4 F0K1 28 kDa    | 0 | 0  | 0  | 12 | 0  | 0 | 0  | 0 | 0 |
| tr D8FLF1 D8F 28 kDa     | 0 | 0  | 12 | 0  | 0  | 0 | 0  | 0 | 0 |
| tr E4SWL8 E4SW 27 kDa    | 0 | 0  | 12 | 0  | 0  | 0 | 0  | 0 | 0 |
| tr R5ZFC8 R5ZFC 16 kDa   | 0 | 0  | 1  | 20 | 0  | 0 | 0  | 0 | 0 |
| tr F0K387 F0K1 73 kDa    | 0 | 0  | 13 | 0  | 0  | 0 | 0  | 0 | 0 |
| tr B3WEH2 B3 82 kDa      | 0 | 0  | 0  | 12 | 0  | 0 | 0  | 0 | 0 |
| tr E4SYE1 E4SYE 40 kDa   | 0 | 0  | 0  | 15 | 0  | 0 | 0  | 0 | 0 |
| tr F0K2W1 F0K21 32 kDa   | 0 | 0  | 0  | 15 | 0  | 0 | 0  | 0 | 0 |
| tr S2MNT7 S2MP 36 kDa    | 0 | 0  | 0  | 13 | 0  | 0 | 0  | 0 | 0 |
| tr D8FLP4 D8F 48 kDa     | 0 | 0  | 0  | 15 | 0  | 0 | 0  | 0 | 0 |
| tr F0JZE8 F0JZ1 50 kDa   | 0 | 0  | 10 | 0  | 0  | 0 | 0  | 0 | 0 |
| tr E4SVY9 E4S 50 kDa     | 0 | 0  | 0  | 14 | 0  | 0 | 0  | 0 | 0 |
| sp B3WA08 RL1_ 24 kDa    | 0 | 11 | 0  | 0  | 0  | 0 | 0  | 0 | 0 |
| sp Q04A20 ERA_ 34 kDa    | 0 | 0  | 0  | 11 | 0  | 0 | 0  | 0 | 0 |
| sp Q038L9 SYP_ 64 kDa    | 0 | 0  | 0  | 12 | 0  | 0 | 0  | 0 | 0 |
| tr B3WCK8 B3W 10 kDa     | 0 | 0  | 0  | 12 | 0  | 0 | 0  | 0 | 0 |
| tr D8FPL3 D8FPL 84 kDa   | 0 | 0  | 0  | 10 | 0  | 0 | 0  | 0 | 0 |
| tr E4SLE9 E4SLE 40 kDa   | 0 | 0  | 0  | 11 | 0  | 0 | 0  | 0 | 0 |
| tr F0JZT8 F0JZT8 26 kDa  | 0 | 0  | 0  | 12 | 0  | 0 | 0  | 0 | 0 |
| tr Q1G8F1 Q1 43 kDa      | 0 | 0  | 0  | 0  | 10 | 0 | 0  | 0 | 0 |
| tr E4SWM9 E4SV 26 kDa    | 0 | 0  | 0  | 11 | 0  | 0 | 0  | 0 | 0 |
| tr F0HUQ5 F0HU 17 kDa    | 0 | 0  | 0  | 11 | 0  | 0 | 0  | 0 | 0 |
| tr F0K1Q2 F0K1C 32 kDa   | 0 | 0  | 0  | 10 | 0  | 0 | 0  | 0 | 0 |
| tr F0K355 F0K35 133 kDa  | 0 | 0  | 0  | 11 | 0  | 0 | 0  | 0 | 0 |
| tr D4YSH9 D4YS1 18 kDa   | 0 | 2  | 0  | 18 | 0  | 0 | 0  | 0 | 0 |
| tr D8FRD0 D8F 36 kDa     | 0 | 0  | 1  | 13 | 0  | 0 | 0  | 0 | 0 |
| tr D8FRH5 D8FRI 85 kDa   | 0 | 0  | 1  | 13 | 0  | 0 | 0  | 0 | 0 |
| tr Q04B82 Q04B 30 kDa    | 0 | 0  | 1  | 13 | 0  | 0 | 0  | 0 | 0 |
| sp Q049G2 RL35 8 kDa     | 0 | 0  | 0  | 11 | 0  | 0 | 0  | 0 | 0 |
| tr A8YXF4 A8YXF 13 kDa   | 0 | 0  | 0  | 7  | 0  | 0 | 0  | 0 | 0 |
| tr COWLS5 C01 36 kDa     | 0 | 0  | 0  | 7  | 0  | 0 | 0  | 0 | 0 |
| tr C2CY45 C2C 36 kDa     | 0 | 0  | 0  | 7  | 0  | 0 | 0  | 0 | 0 |
| tr D8FPH3 D8FPI 11 kDa   | 0 | 0  | 0  | 7  | 0  | 0 | 0  | 0 | 0 |
| tr D8FPV5 D8FPI 49 kDa   | 0 | 0  | 0  | 12 | 0  | 0 | 0  | 0 | 0 |
| tr E4SYW8 E4SY1 66 kDa   | 0 | 0  | 0  | 10 | 1  | 0 | 0  | 2 | 0 |
| tr E4SZ83 E4SZ8 54 kDa   | 0 | 0  | 0  | 11 | 0  | 0 | 2  | 0 | 0 |
| tr F0JY14 F0JY14_ 21 kDa | 0 | 0  | 0  | 11 | 0  | 0 | 2  | 0 | 0 |
| tr F0JZP6 F0JZP6 38 kDa  | 0 | 19 | 0  | 0  | 0  | 0 | 1  | 0 | 0 |

**Supplemental Table 2:** Putative SLAPs in *L. acidophilus*, *L. helveticus*, *L. amylovorus*, and *L. crispatus*

| Identified protein                             | ORF              | UniProt ID | Organism              | Molecular weight | Pfam domain(s)        | Amino Acid coverage | Spectral count |
|------------------------------------------------|------------------|------------|-----------------------|------------------|-----------------------|---------------------|----------------|
| <b><i>L. acidophilus</i> NCFM</b>              |                  |            |                       |                  |                       |                     |                |
| Putative serine protease                       | LBA1578          | Q5FIS9     | <i>L. acidophilus</i> | 78 kDa           | -                     | 583/694 (84%)       | 1129           |
| Putative uncharacterized protein               | LBA0695          | Q5FL54     | <i>L. acidophilus</i> | 62 kDa           | Big_3;SH3_8           | 410/550 (75%)       | 898            |
| Putative uncharacterized protein               | LBA0222          | Q5FMF7     | <i>L. acidophilus</i> | 30 kDa           | -                     | 152/282 (54%)       | 609            |
| Putative surface layer protein                 | LBA1029          | Q5FK97     | <i>L. acidophilus</i> | 43 kDa           | -                     | 300/385 (78%)       | 562            |
| SlpX                                           | LBA0512          | Q5FLN0     | <i>L. acidophilus</i> | 54 kDa           | SLAP                  | 324/499 (65%)       | 428            |
| Cell separation protein                        | cdpA (LBA0223)   | Q5FMF6     | <i>L. acidophilus</i> | 64 kDa           | SLAP (2)              | 372/599 (62%)       | 276            |
| Putative uncharacterized protein               | LBA1426          | Q5FJ73     | <i>L. acidophilus</i> | 28 kDa           | -                     | 159/252 (69%)       | 255            |
| Aminopeptidase                                 | LBA1567          | Q5FIU0     | <i>L. acidophilus</i> | 57 kDa           | Peptidase_M1          | 339/505 (67%)       | 265            |
| Putative uncharacterized protein               | LBA0864          | Q5FKQ1     | <i>L. acidophilus</i> | 55 kDa           | -                     | 316/467 (64%)       | 255            |
| Putative fibronectin domain                    | LBA0191          | Q5FM17     | <i>L. acidophilus</i> | 52 kDa           | fn3                   | 329/463 (71%)       | 249            |
| Putative surface protein                       | LBA1568          | Q5FIT9     | <i>L. acidophilus</i> | 39 kDa           | -                     | 233/353 (66%)       | 226            |
| Putative uncharacterized protein               | LBA1539          | Q5FIW6     | <i>L. acidophilus</i> | 19 kDa           | -                     | 122/171 (71%)       | 196            |
| Penicillin-binding protein                     | LBA0858          | Q5FKQ5     | <i>L. acidophilus</i> | 42 kDa           | Beta-lactamase        | 248/369 (67%)       | 171            |
| Oligopeptide ABC transporter substrate bindin  | oppA (LBA0197)   | Q5FMI2     | <i>L. acidophilus</i> | 65 kDa           | SBP_bac_5             | 366/585 (63%)       | 169            |
| Lysin                                          | lysA (LBA0851)   | Q5FKR2     | <i>L. acidophilus</i> | 35 kDa           | N/A                   | 226/323 (70%)       | 157            |
| Penicillin-binding protein                     | LBA0805          | Q5FKV5     | <i>L. acidophilus</i> | 79 kDa           | PASTA                 | 379/720 (53%)       | 156            |
| Putative uncharacterized protein               | LBA1227          | Q5FJR3     | <i>L. acidophilus</i> | 21 kDa           | -                     | 109/182 (60%)       | 128            |
| Penicillin-binding protein                     | LBA1006          | Q5FKB8     | <i>L. acidophilus</i> | 41 kDa           | Beta-lactamase        | 276/364 (76%)       | 127            |
| Putative alkylphosphonate ABC transporter pr   | LBA0014          | Q5FN03     | <i>L. acidophilus</i> | 35 kDa           | -                     | 187/313 (60%)       | 124            |
| Glycerol-3-phosphate ABC transporter           | LBA1641          | Q5FIM1     | <i>L. acidophilus</i> | 47 kDa           | -                     | 293/433 (68%)       | 118            |
| Putative membrane protein                      | LBA1690          | Q5FIH2     | <i>L. acidophilus</i> | 31 kDa           | -                     | 207/280 (74%)       | 116            |
| Foldase                                        | prsA (LBA1588)   | Q5FIS0     | <i>L. acidophilus</i> | 33 kDa           | Foldase               | 193/300 (64%)       | 116            |
| Putative enterolysin A                         | LBA1207          | Q5FIT1     | <i>L. acidophilus</i> | 24 kDa           | Peptidase_M23         | 139/213 (65%)       | 89             |
| Putative membrane protein                      | LBA1661          | Q5FIK1     | <i>L. acidophilus</i> | 20 kDa           | N/A                   | 86/180 (48%)        | 77             |
| Putative uncharacterized protein               | LBA0040          | Q5FMX9     | <i>L. acidophilus</i> | 10 kDa           | DUF4430               | 64/87 (74%)         | 74             |
| N-acetylmuramidase                             | LBA0176          | Q5FMJ9     | <i>L. acidophilus</i> | 45 kDa           | Glucosaminidase; SLAP | 176/409 (43%)       | 61             |
| Putative surface exclusion protein             | LBA0494          | Q5FLP5     | <i>L. acidophilus</i> | 40 kDa           | -                     | 168/355 (47%)       | 50             |
| Autolysin, amidase                             | LBA0177          | Q5FMJ8     | <i>L. acidophilus</i> | 41 kDa           | Amidase_2; SLAP       | 160/364 (44%)       | 42             |
| Putative uncharacterized protein               | LBA0046          | Q5FMX4     | <i>L. acidophilus</i> | 13 kDa           | -                     | 62/118 (53%)        | 40             |
| Putative cell surface protein                  | LBA1079          | Q5FK50     | <i>L. acidophilus</i> | 23 kDa           | ykuD                  | 79/202 (39%)        | 34             |
| <b><i>L. helveticus</i> CNR232</b>             |                  |            |                       |                  |                       |                     |                |
| Putative bacterial surface layer protein       | lhe_1849         | S5E4S6     | <i>L. helveticus</i>  | 37 kDa           | SLAP                  | 214/338 (63%)       | 841            |
| Surface layer protein                          | lhe_0185         | S5DTT0     | <i>L. helveticus</i>  | 47 kDa           | SLAP                  | 352/437 (81%)       | 767            |
| Uncharacterized protein                        | lhe_0702         | S5DUP5     | <i>L. helveticus</i>  | 61 kDa           | Big_3; SH3_8          | 357/541 (66%)       | 629            |
| Uncharacterized protein                        | lhe_1516         | S5E402     | <i>L. helveticus</i>  | 35 kDa           | -                     | 190/325 (58%)       | 443            |
| Uncharacterized protein                        | lhe_0573         | S5DUF9     | <i>L. helveticus</i>  | 31 kDa           | -                     | 140/247 (51%)       | 427            |
| Putative bacterial surface layer protein       | lhe_1848         | S5DY29     | <i>L. helveticus</i>  | 49 kDa           | SLAP                  | 239/464 (52%)       | 288            |
| Uncharacterized protein                        | lhe_1520         | S5E8T5     | <i>L. helveticus</i>  | 24 kDa           | -                     | 96/214 (45%)        | 206            |
| 30S ribosomal protein S2                       | rpsB (lhe_1284)  | S5DWW6     | <i>L. helveticus</i>  | 29 kDa           | N/A                   | 190/257 (74%)       | 181            |
| Glutamate tRNA ligase                          | gltX (lhe_1731)  | S5DXP8     | <i>L. helveticus</i>  | 58 kDa           | N/A                   | 199/499 (40%)       | 177            |
| Uncharacterized protein                        | lhe_0056         | S5DTJ2     | <i>L. helveticus</i>  | 15 kDa           | DUF4430               | 57/136 (42%)        | 145            |
| Oligopeptide ABC transport protein periplasmic | oppA2 (lhe_1309) | S5E085     | <i>L. helveticus</i>  | 65 kDa           | SBP_bac_5             | 192/583 (33%)       | 127            |
| Fibronectin domain-containing protein          | lhe_1881         | S5E4V9     | <i>L. helveticus</i>  | 52 kDa           | N/A                   | 191/464 (41%)       | 125            |
| N-acetylmuramidase                             | lhe_0189         | S5DX82     | <i>L. helveticus</i>  | 45 kDa           | Glucosaminidase; SLAP | 165/407 (41%)       | 112            |
| Proline tRNA ligase                            | proS (lhe_1277)  | S5DWW8     | <i>L. helveticus</i>  | 63 kDa           | N/A                   | 210/565 (37%)       | 109            |
| 30S ribosomal protein S1                       | lhe_0967         | S5DZ59     | <i>L. helveticus</i>  | 44 kDa           | N/A                   | 149/403 (37%)       | 85             |
| DNA gyrase subunit A                           | gyrA (lhe_0006)  | S5DWM8     | <i>L. helveticus</i>  | 92 kDa           | N/A                   | 244/827 (30%)       | 81             |
| 30S ribosomal protein S7                       | rpsG (lhe_1792)  | S5E0Z5     | <i>L. helveticus</i>  | 18 kDa           | N/A                   | 80/156 (51%)        | 69             |
| Pyruvate kinase                                | lhe_0957         | S5DZ51     | <i>L. helveticus</i>  | 63 kDa           | N/A                   | 198/589 (34%)       | 67             |
| Conserved hypothetical penicillin-binding prot | bbpX (lhe_0876)  | A4ZH27     | <i>L. helveticus</i>  | 41 kDa           | beta-lactamase        | 106/360 (29%)       | 62             |
| Putative lactocepine S-layer protein           | lhe_1255         | S5DWI6     | <i>L. helveticus</i>  | 19 kDa           | SLAP (2)              | 66/165 (40%)        | 61             |
| Uncharacterized protein                        | lhe_0100         | S5DZM9     | <i>L. helveticus</i>  | 28 kDa           | -                     | 77/245 (31%)        | 55             |
| GroEL chaperonin                               | groL (lhe_1673)  | A4ZGY6     | <i>L. helveticus</i>  | 58 kDa           | N/A                   | 220/540 (41%)       | 53             |
| Autolysin, amidase                             | lhe_0190         | S5DTT4     | <i>L. helveticus</i>  | 41 kDa           | Amidase (2); SLAP     | 112/363 (31%)       | 50             |
| 50S ribosomal protein L18                      | rplL (lhe_1711)  | S5E0T9     | <i>L. helveticus</i>  | 13 kDa           | N/A                   | 43/119 (36%)        | 47             |
| Phenylalanine tRNA ligase beta subunit         | pheT (lhe_1463)  | S5E3W0     | <i>L. helveticus</i>  | 89 kDa           | N/A                   | 154/804 (19%)       | 44             |
| Threonine tRNA ligase                          | thrS (lhe_1489)  | S5E3X9     | <i>L. helveticus</i>  | 74 kDa           | N/A                   | 135/644 (21%)       | 43             |
| Serine hydroxymethyltransferase                | glyA (lhe_1825)  | C4MCM0     | <i>L. helveticus</i>  | 45 kDa           | N/A                   | 89/411 (22%)        | 41             |
| Translation initiation factor IF-2             | infB (lhe_1271)  | S5DZN8     | <i>L. helveticus</i>  | 97 kDa           | N/A                   | 132/820 (15%)       | 38             |
| 50S ribosomal protein L20                      | rplT (lhe_1479)  | S5DX46     | <i>L. helveticus</i>  | 14 kDa           | N/A                   | 50/118 (42%)        | 38             |
| 50S ribosomal protein L7/L12                   | rplL (lhe_1711)  | S5E0T9     | <i>L. helveticus</i>  | 12 kDa           | N/A                   | 74/120 (62%)        | 33             |
| Glycerol-3-phosphate ABC transport protein pe  | lhe_0473         | S5DXX4     | <i>L. helveticus</i>  | 48 kDa           | -                     | 128/433 (30%)       | 33             |
| Purine operon repressor                        | lhe_1853         | S5DY32     | <i>L. helveticus</i>  | 31 kDa           | N/A                   | 94/276 (34%)        | 33             |
| Asparagine tRNA ligase                         | asnS (lhe_1150)  | S5E3Z5     | <i>L. helveticus</i>  | 50 kDa           | N/A                   | 97/432 (22%)        | 32             |
| Enolase                                        | eno (lhe_0896)   | S5E776     | <i>L. helveticus</i>  | 47 kDa           | N/A                   | 117/428 (27%)       | 31             |
| Elongation factor Tu                           | tuf (lhe_0862)   | S5E2B3     | <i>L. helveticus</i>  | 44 kDa           | N/A                   | 108/396 (27%)       | 31             |
| DNA-directed RNA polymerase subunit beta       | rpoB (lhe_1796)  | S5E9C3     | <i>L. helveticus</i>  | 136 kDa          | N/A                   | 104/1213 (9%)       | 26             |
| ABC transport protein substrate-binding comp   | malE (lhe_0253)  | S5DXE6     | <i>L. helveticus</i>  | 44 kDa           | -                     | 147/408 (36%)       | 25             |
| ATP synthase subunit alpha                     | atpA (lhe_0780)  | S5DVE6     | <i>L. helveticus</i>  | 55 kDa           | N/A                   | 79/503 (16%)        | 25             |
| Membrane alanine aminopeptidase                | pepM1 (lhe_1515) | G8DA67     | <i>L. helveticus</i>  | 57 kDa           | N/A                   | 96/504 (19%)        | 23             |
| Probable tRNA sulfurtransferase                | thiI (lhe_0795)  | S5DVF8     | <i>L. helveticus</i>  | 46 kDa           | N/A                   | 108/405 (17%)       | 23             |
| Uncharacterized protein                        | lhe_0099         | S5DTK6     | <i>L. helveticus</i>  | 41 kDa           | SLAP                  | 107/373 (29%)       | 22             |
| Foldase protein PrsA                           | prsA (lhe_1533)  | A4UAE0     | <i>L. helveticus</i>  | 33 kDa           | N/A                   | 70/300 (23%)        | 22             |
| DNA topoisomerase 1                            | topA (lhe_0980)  | S5DVV3     | <i>L. helveticus</i>  | 81 kDa           | N/A                   | 85/704 (12%)        | 21             |
| Uncharacterized protein                        | lhe_401          | S5E0Y4     | <i>L. helveticus</i>  | 38 kDa           | CAP                   | 59/337 (18%)        | 20             |
| 30S ribosomal protein S17                      | rpsQ (lhe_1780)  | S5DXT7     | <i>L. helveticus</i>  | 11 kDa           | N/A                   | 31/88 (35%)         | 20             |
| <b><i>L. helveticus</i> 481-C</b>              |                  |            |                       |                  |                       |                     |                |
| Putative bacterial surface layer protein       | lhe_1849         | S5E4S6     | <i>L. helveticus</i>  | 37 kDa           | SLAP                  | 195/338 (58%)       | 776            |
| Putative bacterial surface layer protein       | lhe_1848         | S5DY29     | <i>L. helveticus</i>  | 49 kDa           | SLAP                  | 184/464 (40%)       | 619            |
| Uncharacterized protein                        | lhe_0702         | S5DUP5     | <i>L. helveticus</i>  | 61 kDa           | Big_3; SH3_8          | 414/541 (77%)       | 392            |

|                                                        |                  |        |                                      |                                      |                                         |                |      |
|--------------------------------------------------------|------------------|--------|--------------------------------------|--------------------------------------|-----------------------------------------|----------------|------|
| Fibronectin domain-containing protein                  | lhe_1881         | S5E4V9 | <i>L. helveticus</i> CNR232          | 52 kDa                               | fn3                                     | 336/464 (72%)  | 261  |
| Uncharacterized protein                                | lhe_0099         | S5DTK6 | <i>L. helveticus</i> CNR232          | 41 kDa                               | SLAP                                    | 213/373 (57%)  | 197  |
| Oligopeptide ABC transport protein periplasmic         | oppA2 (lhe_1309) | S5E085 | <i>L. helveticus</i> CNR232          | 65 kDa                               | SBP_bac_5                               | 310/583 (53%)  | 162  |
| Surface layer protein                                  | lhe_0185         | S5DTT0 | <i>L. helveticus</i> CNR232          | 47 kDa                               | SLAP                                    | 58/437 (13%)   | 136  |
| Lysin                                                  | lhe_0210         | S5ESK2 | <i>L. helveticus</i> CNR232          | 29 kDa                               | Glyco_hydro_25                          | 154/276 (56%)  | 81   |
| Uncharacterized protein                                | lhe_1516         | S5E402 | <i>L. helveticus</i> CNR232          | 35 kDa                               | -                                       | 118/325 (36%)  | 71   |
| Conserved hypothetical penicillin-binding protein      | pbpX (lhe_0876)  | A4ZH27 | <i>L. helveticus</i> CNR232          | 41 kDa                               | beta-lactamase                          | 175/360 (49%)  | 69   |
| Uncharacterized protein                                | lhe_0056         | S5DTJ2 | <i>L. helveticus</i> CNR232          | 15 kDa                               | DUF4430                                 | 53/136 (39%)   | 54   |
| Conserved hypothetical penicillin-binding protein      | pbpC1 (lhe_1002) | A4ZH10 | <i>L. helveticus</i> CNR232          | 41 kDa                               | beta-lactamase                          | 164/365 (45%)  | 48   |
| N-acetylmuramidase                                     | lhe_0189         | S5DX82 | <i>L. helveticus</i> CNR232          | 45 kDa                               | glucosamidase; SLAP                     | 117/407 (29%)  | 40   |
| Uncharacterized protein                                | lhe_0152         | S5E573 | <i>L. helveticus</i> CNR232          | 46 kDa                               | CAP                                     | 158/411 (38%)  | 35   |
| Lactocepain H proteinase PrtH                          | lhe_1828         | S5DXX8 | <i>L. helveticus</i> CNR232          | 199 kDa                              | DUF1034; Inhibitor_I9; PA; Peptidase_s8 | 328/1843 (18%) | 34   |
| Foldase protein PrsA                                   | prsA (lhe_1533)  | A4UAE0 | <i>L. helveticus</i> CNR232          | 33 kDa                               | N/A                                     | 171/300 (57%)  | 34   |
| Uncharacterized protein                                | lhe_1445         | S5EOG0 | <i>L. helveticus</i> CNR232          | 36 kDa                               | -                                       | 127/333 (38%)  | 33   |
| Conserved hypothetical penicillin-binding protein      | pbpC2 (lhe_0078) | A4ZGY7 | <i>L. helveticus</i> CNR232          | 38 kDa                               | beta-lactamase                          | 184/336 (55%)  | 31   |
| Membrane alanine aminopeptidase                        | pepM1 (lhe_1515) | G8DA67 | <i>L. helveticus</i> CNR232          | 57 kDa                               | N/A                                     | 167/504 (33%)  | 22   |
| Uncharacterized protein                                | lhe_1487         | S5E0I5 | <i>L. helveticus</i> CNR232          | 21 kDa                               | -                                       | 65/186 (35%)   | 22   |
| Glycerol-3-phosphate ABC transport protein periplasmic | lhe_0473         | S5DXX4 | <i>L. helveticus</i> CNR232          | 48 kDa                               | -                                       | 128/433 (30%)  | 20   |
| <b>L. helveticus 15009</b>                             |                  |        |                                      |                                      |                                         |                |      |
| Putative bacterial surface layer protein               | lhe_1849         | S5E4S6 | <i>L. helveticus</i> CNR232          | 37 kDa                               | SLAP                                    | 201/338 (59%)  | 1336 |
| Uncharacterized protein                                | lhe_0702         | S5DUP5 | <i>L. helveticus</i> CNR232          | 61 kDa                               | Big_3; SH3_8                            | 432/541 (80%)  | 615  |
| Putative bacterial surface layer protein               | lhe_1848         | S5DY29 | <i>L. helveticus</i> CNR232          | 49 kDa                               | SLAP                                    | 266/464 (57%)  | 597  |
| Uncharacterized protein                                | lhe_573          | S5DUF9 | <i>L. helveticus</i> CNR232          | 31 kDa                               | -                                       | 142/274 (52%)  | 410  |
| Fibronectin domain-containing protein                  | lhe_1881         | S5E4V9 | <i>L. helveticus</i> CNR232          | 52 kDa                               | fn3                                     | 335/464 (72%)  | 297  |
| Oligopeptide ABC transport protein periplasmic         | oppA2 (lhe_1309) | S5E085 | <i>L. helveticus</i> CNR232          | 65 kDa                               | SBP_bac_5                               | 368/583 (63%)  | 292  |
| ATP-dependent protease ATP-binding subunit             | clpE (lhe_0217)  | S5DXB1 | <i>L. helveticus</i> CNR232          | 79 kDa                               | N/A                                     | 519/707 (73%)  | 243  |
| Uncharacterized protein                                | lhe_1516         | S5E402 | <i>L. helveticus</i> CNR232          | 35 kDa                               | -                                       | 183/325 (56%)  | 184  |
| GroEL chaperonin                                       | groL (lhe_1673)  | A4ZGY6 | <i>L. helveticus</i> CNR232          | 58 kDa                               | N/A                                     | 395/540 (73%)  | 166  |
| Pyruvate kinase                                        | lhe_0957         | S5DZ51 | <i>L. helveticus</i> CNR232          | 63 kDa                               | N/A                                     | 410/589 (70%)  | 161  |
| Lactocepain H3 proteinase                              | prtH3 (lhe_1520) | G8DA68 | <i>L. helveticus</i> CNR232          | 179 kDa                              | DUF1034; Peptidase_s8                   | 697/1637 (43%) | 139  |
| Enolase                                                | eno (lhe_0896)   | S5E776 | <i>L. helveticus</i> CNR232          | 47 kDa                               | N/A                                     | 332/428 (78%)  | 132  |
| Uncharacterized protein                                | lhe_0056         | S5DTJ2 | <i>L. helveticus</i> CNR232          | 15 kDa                               | DUF4430                                 | 67/136 (49%)   | 108  |
| 30S ribosomal protein S1                               | lhe_0967         | S5DZ59 | <i>L. helveticus</i> CNR232          | 44 kDa                               | N/A                                     | 272/403 (67%)  | 99   |
| Surface layer protein                                  | lhe_0185         | S5DTT0 | <i>L. helveticus</i> CNR232          | 47 kDa                               | SLAP                                    | 106/437 (24%)  | 92   |
| Elongation factor Tu                                   | tuf (lhe_0862)   | S5E2B3 | <i>L. helveticus</i> CNR232          | 44 kDa                               | N/A                                     | 217/396 (55%)  | 92   |
| <b>L. amylovorus ATCC 3620</b>                         |                  |        |                                      |                                      |                                         |                |      |
| Uncharacterized protein                                | LA2_01250        | E4SKI1 | <i>L. amylovorus</i> GRL 111 28 kDa  | -                                    | -                                       | 133/256 (52%)  | 791  |
| Uncharacterized protein                                | LA2_00480        | E4SIM6 | <i>L. amylovorus</i> GRL 111 34 kDa  | SLAP                                 | 181/303 (60%)                           | 514            |      |
| Uncharacterized protein                                | LA2_03575        | E4SN46 | <i>L. amylovorus</i> GRL 111 61 kDa  | Big_3                                | 275/542 (51%)                           | 501            |      |
| Cell Separation protein                                | LA2_01255        | E4SKI2 | <i>L. amylovorus</i> GRL 111 62 kDa  | FIVAR; SLAP (3)                      | 236/582 (41%)                           | 444            |      |
| Uncharacterized protein                                | LA2_02085        | E4SLF0 | <i>L. amylovorus</i> GRL 111 28 kDa  | SLAP                                 | 164/240 (68%)                           | 433            |      |
| S-layer protein                                        | LA2_08875        | E4SLY7 | <i>L. amylovorus</i> GRL 111 71 kDa  | Ig/albumin binding                   | 260/683 (41%)                           | 348            |      |
| Uncharacterized protein                                | LA2_05380        | E4SIN8 | <i>L. amylovorus</i> GRL 111 54 kDa  | Fn3 (2)                              | 146/479 (30%)                           | 173            |      |
| 30S ribosomal protein S2                               | rpsB (LA2_0717)  | E4SK06 | <i>L. amylovorus</i> GRL 111 29 kDa  | N/A                                  | 137/257 (53%)                           | 171            |      |
| Fibronectin-domain protein                             | LA2_01095        | E4SK72 | <i>L. amylovorus</i> GRL 111 41 kDa  | -                                    | 185/364 (51%)                           | 157            |      |
| Lysin                                                  | LA2_07550        | E4SKF6 | <i>L. amylovorus</i> GRL 111 44 kDa  | Glyco_hydro_25; SLAP                 | 93/409 (23%)                            | 139            |      |
| 30S ribosomal protein S1                               | rpsA (LA2_0504)  | E4SIH2 | <i>L. amylovorus</i> GRL 111 44 kDa  | N/A                                  | 201/403 (50%)                           | 125            |      |
| SlpX                                                   | LA2_02740        | E4SM72 | <i>L. amylovorus</i> GRL 111 53 kDa  | SLAP                                 | 45/501 (9%)                             | 113            |      |
| Glutamate tRNA ligase                                  | gltX (LA2_0179)  | E4SL16 | <i>L. amylovorus</i> GRL 111 58 kDa  | N/A                                  | 189/499 (38%)                           | 108            |      |
| Oligopeptide ABC transporter substrate binding         | LA2_07335        | E4SKB5 | <i>L. amylovorus</i> GRL 111 66 kDa  | SBP_bac_5                            | 134/590 (23%)                           | 102            |      |
| Elongation factor Tu                                   | tuf (LA2_04435)  | E4SI61 | <i>L. amylovorus</i> GRL 111 44 kDa  | N/A                                  | 169/396 (43%)                           | 102            |      |
| Cell division protein FtsI/penicillin-binding protein  | LA2_04230        | E4SI20 | <i>L. amylovorus</i> GRL 111 79 kDa  | PASTA (2); PBP_dimer; Transpeptidase | 242/720 (34%)                           | 95             |      |
| Trigger factor                                         | tig (LA2_04440)  | E4SI62 | <i>L. amylovorus</i> GRL 111 49 kDa  | N/A                                  | 165/443 (37%)                           | 94             |      |
| 50S ribosomal protein L4                               | rplD (LA2_0155)  | E4SKN8 | <i>L. amylovorus</i> GRL 111 22 kDa  | N/A                                  | 93/205 (45%)                            | 93             |      |
| 30S ribosomal protein S7                               | rpsG (LA2_0153)  | E4SKN4 | <i>L. amylovorus</i> GRL 111 18 kDa  | N/A                                  | 82/156 (53%)                            | 86             |      |
| 50S ribosomal protein L18                              | rplR (LA2_0163)  | E4SKY3 | <i>L. amylovorus</i> GRL 111 13 kDa  | N/A                                  | 43/119 (36%)                            | 82             |      |
| 50S ribosomal protein L2                               | rplB (LA2_0156)  | E4SKX0 | <i>L. amylovorus</i> GRL 111 30 kDa  | N/A                                  | 139/278 (50%)                           | 78             |      |
| 30S ribosomal protein S4                               | rpsD (LA2_0412)  | E4SNM7 | <i>L. amylovorus</i> GRL 111 23 kDa  | N/A                                  | 77/203 (38%)                            | 72             |      |
| N-acetylmuramidase                                     | LA2_01030        | E4SK59 | <i>L. amylovorus</i> GRL 111 45 kDa  | glucosamidase; SLAP                  | 87/409 (21%)                            | 70             |      |
| Uncharacterized protein                                | LA2_05510        | E4SIR2 | <i>L. amylovorus</i> GRL 111 44 kDa  | -                                    | 149/393 (38%)                           | 68             |      |
| Pyruvate kinase                                        | LA2_04990        | E4SIG2 | <i>L. amylovorus</i> GRL 111 62 kDa  | N/A                                  | 207/589 (35%)                           | 68             |      |
| Oligopeptide ABC transporter substrate binding         | LA2_09360        | E4SMF4 | <i>L. amylovorus</i> GRL 111 61 kDa  | SBP_bac_5                            | 159/545 (29%)                           | 63             |      |
| Oligopeptide ABC transporter substrate binding         | LA2_08075        | E4SL67 | <i>L. amylovorus</i> GRL 111 65 kDa  | SBP_bac_5                            | 126/581 (22%)                           | 61             |      |
| Penicillin binding protein                             | LA2_04505        | E4SI75 | <i>L. amylovorus</i> GRL 111 41 kDa  | Beta-lactamase                       | 131/367 (36%)                           | 54             |      |
| 50S ribosomal protein L20                              | rplT (LA2_0859)  | E4SLN0 | <i>L. amylovorus</i> GRL 111 14 kDa  | N/A                                  | 50/118 (42%)                            | 54             |      |
| Thioredoxin reductase                                  | LA2_03500        | E4SN31 | <i>L. amylovorus</i> GRL 111 34 kDa  | N/A                                  | 126/309 (41%)                           | 48             |      |
| Surface protein                                        | LA2_08860        | E4SLY4 | <i>L. amylovorus</i> GRL 111 35 kDa  | -                                    | 40/325 (12%)                            | 45             |      |
| 30S ribosomal protein S3                               | rpsC (LA2_0158)  | E4SKX3 | <i>L. amylovorus</i> GRL 111 25 kDa  | N/A                                  | 58/224 (26%)                            | 45             |      |
| 50S ribosomal protein L5                               | rplE (LA2_0161)  | E4SKX9 | <i>L. amylovorus</i> GRL 111 20 kDa  | N/A                                  | 86/180 (48%)                            | 44             |      |
| Elongation factor Ts                                   | tsf (LA2_07170)  | E4SK05 | <i>L. amylovorus</i> GRL 111 37 kDa  | N/A                                  | 91/340 (27%)                            | 44             |      |
| Aminopeptidase N                                       | LA2_08855        | E4SLY3 | <i>L. amylovorus</i> GRL 111 50 kDa  | peptidase_M1                         | 112/434 (26%)                           | 43             |      |
| DNA gyrase subunit A                                   | gyrA (LA2_0003)  | E4SI61 | <i>L. amylovorus</i> GRL 111 91 kDa  | N/A                                  | 149/821 (18%)                           | 43             |      |
| Uncharacterized protein                                | LA2_00765        | E4SIT0 | <i>L. amylovorus</i> GRL 111 46 kDa  | CAP                                  | 128/413 (31%)                           | 43             |      |
| Penicillin binding protein                             | LA2_00330        | E4SIB8 | <i>L. amylovorus</i> GRL 111 41 kDa  | Beta-lactamase                       | 92/368 (25%)                            | 41             |      |
| Elongation factor G                                    | fusA (LA2_0154)  | E4SKN5 | <i>L. amylovorus</i> GRL 111 77 kDa  | N/A                                  | 197/697 (28%)                           | 39             |      |
| PrtP                                                   | prtP (LA2_0270)  | E4SM65 | <i>L. amylovorus</i> GRL 111 183 kDa | DUF1034; peptidase_s8; SLAP (2)      | 8/1665 (0%)                             | 39             |      |
| 30S ribosomal protein S13                              | rpsM (LA2_0167)  | E4SKZ1 | <i>L. amylovorus</i> GRL 111 13 kDa  | N/A                                  | 66/116 (57%)                            | 36             |      |
| Penicillin binding protein                             | LA2_05270        | E4SIL6 | <i>L. amylovorus</i> GRL 111 42 kDa  | Beta-lactamase                       | 111/374 (30%)                           | 35             |      |
| Enolase                                                | eno (LA2_0467)   | E4SIA4 | <i>L. amylovorus</i> GRL 111 47 kDa  | N/A                                  | 89/428 (21%)                            | 34             |      |
| Oligopeptide ABC transporter substrate binding         | LA2_07340        | E4SKB6 | <i>L. amylovorus</i> GRL 111 66 kDa  | SBP_bac_5                            | 25/589 (4%)                             | 34             |      |
| Putative cell surface protein                          | LA2_09065        | E4SM23 | <i>L. amylovorus</i> GRL 111 25 kDa  | YkuD                                 | 38/224 (17%)                            | 33             |      |
| 50S ribosomal protein L3                               | rplC (LA2_0155)  | E4SKN7 | <i>L. amylovorus</i> GRL 111 23 kDa  | N/A                                  | 82/212 (39%)                            | 32             |      |
| Translation initiation factor IF-2                     | infB (LA2_0711)  | E4SIZ3 | <i>L. amylovorus</i> GRL 111 97 kDa  | N/A                                  | 117/867 (13%)                           | 31             |      |



|                                                            |                          |                                     |                           |               |      |
|------------------------------------------------------------|--------------------------|-------------------------------------|---------------------------|---------------|------|
| Threonine-tRNA ligase                                      | thrS (LA2_0860 E4SLN3    | <i>L. amylovorus</i> GRL 111 74 kDa | N/A                       | 98/685 (15%)  | 28   |
| Glycerol-3-phosphate ABC transporter                       | LA2_09235 E4SMC9         | <i>L. amylovorus</i> GRL 111 47 kDa | -                         | 86/434 (20%)  | 28   |
| Asparagine tRNA ligase                                     | asnC (LA2_0654 E4SIH5    | <i>L. amylovorus</i> GRL 111 50 kDa | N/A                       | 100/432 (23%) | 28   |
| 50S ribosomal protein L22                                  | rplV (LA2_0157 E4SKX2    | <i>L. amylovorus</i> GRL 111 13 kDa | N/A                       | 44/117 (38%)  | 28   |
| S-layer protein                                            | LA2_00970 E4SK47         | <i>L. amylovorus</i> GRL 111 48 kDa | SLAP                      | 19/456 (4%)   | 28   |
| 30S ribosomal protein S11                                  | rpsK (LA2_0167 E4SKZ2    | <i>L. amylovorus</i> GRL 111 14 kDa | N/A                       | 43/129 (33%)  | 26   |
| Fructose-bisphosphate aldolase                             | LA2_09055 E4SM21         | <i>L. amylovorus</i> GRL 111 33 kDa | N/A                       | 61/305 (20%)  | 25   |
| DNA-directed RNA polymerase subunit alpha                  | rpoA (LA2_0164 E4SKZ3    | <i>L. amylovorus</i> GRL 111 35 kDa | N/A                       | 94/312 (30%)  | 24   |
| 30S ribosomal protein S12                                  | rpsL (LA2_0153 E4SKN3    | <i>L. amylovorus</i> GRL 111 15 kDa | N/A                       | 31/135 (23%)  | 23   |
| 50S ribosomal protein L21                                  | rplU (LA2_0752 E4SKF0    | <i>L. amylovorus</i> GRL 111 11 kDa | N/A                       | 53/103 (51%)  | 23   |
| 50S ribosomal protein L15                                  | rplO (LA2_0164 E4SKY6    | <i>L. amylovorus</i> GRL 111 16 kDa | N/A                       | 62/146 (42%)  | 22   |
| Putative lactocepin S-layer protein                        | LA2_06960 E4SIW9         | <i>L. amylovorus</i> GRL 111 19 kDa | SLAP (2)                  | 28/165 (17%)  | 22   |
| Putative enterolysin A                                     | LA2_06770 E4SIU1         | <i>L. amylovorus</i> GRL 111 19 kDa | peptidase_M23             | 31/172 (18%)  | 22   |
| Uncharacterized protein                                    | LA2_05360 E4SIN4         | <i>L. amylovorus</i> GRL 111 20 kDa | -                         | 40/176 (23%)  | 20   |
| <b><i>L. crispatus</i> ATCC 33820</b>                      |                          |                                     |                           |               |      |
| Putative uncharacterized protein                           | LCRIS_00224 D5H0Y6       | <i>L. crispatus</i> ST1 27 kDa      | SLAP                      | 125/250 (50%) | 1751 |
| Cell separation protein                                    | LCRIS_00225 D5H0Y7       | <i>L. crispatus</i> ST1 63 kDa      | FIVAR; SLAP (3)           | 386/589 (66%) | 1482 |
| S-layer protein                                            | slpX (LCRIS_00508 D5H150 | <i>L. crispatus</i> ST1 53 kDa      | SLAP                      | 340/491 (69%) | 1207 |
| Conserved protein with bacterial Ig-like domain            | LCRIS_00697 D5H2A9       | <i>L. crispatus</i> ST1 61 kDa      | Big_3; SH3_8              | 350/542 (65%) | 790  |
| Conserved protein with bacterial Ig-like domain            | LCRIS_00705 D5H2B7       | <i>L. crispatus</i> ST1 56 kDa      | Big_3                     | 325/510 (64%) | 733  |
| S-layer protein                                            | LCRIS_00012 D5H0C4       | <i>L. crispatus</i> ST1 42 kDa      | SLAP                      | 198/368 (54%) | 362  |
| Bacteriocin helveticin-J                                   | LCRIS_00011 D5H0C3       | <i>L. crispatus</i> ST1 33 kDa      | -                         | 176/292 (60%) | 351  |
| Conserved protein                                          | LCRIS_01523 D5GYW1       | <i>L. crispatus</i> ST1 19 kDa      | -                         | 99/173 (57%)  | 303  |
| S-layer protein                                            | LCRIS_01496 D5GYT4       | <i>L. crispatus</i> ST1 44 kDa      | <b>LBA1029</b>            | 238/393 (61%) | 268  |
| Surface protein                                            | LCRIS_01538 D5GYX6       | <i>L. crispatus</i> ST1 35 kDa      | -                         | 121/325 (37%) | 260  |
| Fibronectin domain                                         | LCRIS_00195 D5H0V7       | <i>L. crispatus</i> ST1 52 kDa      | fn3                       | 280/464 (60%) | 256  |
| Lysin                                                      | LCRIS_01354 D5GYE2       | <i>L. crispatus</i> ST1 44 kDa      | Glyco_hydro_25; SLAP      | 153/412 (37%) | 208  |
| S-layer protein                                            | LCRIS_01471 D5GYQ9       | <i>L. crispatus</i> ST1 27 kDa      | SLAP                      | 145/259 (56%) | 199  |
| Penicillin-binding protein                                 | pbpX (LCRIS_0108 D5GXM1  | <i>L. crispatus</i> ST1 40 kDa      | Beta-lactamase            | 209/356 (59%) | 170  |
| Membrane protein                                           | LCRIS_01714 D5GZF2       | <i>L. crispatus</i> ST1 30 kDa      | Surface exclusion protein | 172/277 (62%) | 161  |
| S-layer protein                                            | slp1 (LCRIS_00171 D5H0T3 | <i>L. crispatus</i> ST1 49 kDa      | SLAP                      | 227/466 (49%) | 160  |
| Putative uncharacterized protein                           | LCRIS_00591 D5H203       | <i>L. crispatus</i> ST1 18 kDa      | -                         | 88/165 (53%)  | 146  |
| Fibronectin-binding protein                                | LCRIS_01031 D5H393       | <i>L. crispatus</i> ST1 52 kDa      | fn3; lg_fold              | 272/460 (59%) | 125  |
| Maltose ABC transporter, maltose binding protein           | malE2 (LCRIS_0181 D5GZY0 | <i>L. crispatus</i> ST1 44 kDa      | -                         | 208/408 (51%) | 117  |
| Levansucrase                                               | sacB (LCRIS_01741 D5GZH9 | <i>L. crispatus</i> ST1 73 kDa      | Glyco_hydro_68            | 207/695 (31%) | 116  |
| 30S ribosomal protein S4                                   | rpsD (LCRIS_0078 D5H2J4  | <i>L. crispatus</i> ST1 23 kDa      | LCRIS_2078                | 160/203 (79%) | 115  |
| 50S ribosomal protein L2                                   | rplB (LCRIS_00301 D5H163 | <i>L. crispatus</i> ST1 30 kDa      | N/A                       | 150/278 (54%) | 108  |
| Penicillin-binding protein                                 | LCRIS_00057 D5H0G9       | <i>L. crispatus</i> ST1 39 kDa      | Beta-lactamase            | 237/350 (68%) | 102  |
| 30S ribosomal protein S7                                   | rpsG (LCRIS_0029 D5H157  | <i>L. crispatus</i> ST1 18 kDa      | N/A                       | 109/156 (70%) | 98   |
| Lysin                                                      | LCRIS_01961 D5H049       | <i>L. crispatus</i> ST1 34 kDa      | Glyco_hydro_25; SLAP      | 144/316 (46%) | 94   |
| 30S ribosomal protein S2                                   | rpsB (LCRIS_0128 D5GY73  | <i>L. crispatus</i> ST1 29 kDa      | N/A                       | 123/257 (48%) | 93   |
| Glycerol-3-phosphate ABC transporter                       | LCRIS_01668 D5GZA6       | <i>L. crispatus</i> ST1 48 kDa      | -                         | 250/433 (58%) | 92   |
| 50S ribosomal protein L4                                   | rplD (LCRIS_00299 D5H161 | <i>L. crispatus</i> ST1 22 kDa      | N/A                       | 131/205 (64%) | 87   |
| Putative uncharacterized protein                           | LCRIS_01297 D5GY85       | <i>L. crispatus</i> ST1 42 kDa      | SLAP                      | 184/374 (49%) | 86   |
| N-acetylmuramidase                                         | LCRIS_00183 D5H0U5       | <i>L. crispatus</i> ST1 45 kDa      | glucosaminidase; SLAP     | 196/408 (48%) | 84   |
| Conserved protein                                          | LCRIS_01395 D5GYI3       | <i>L. crispatus</i> ST1 27 kDa      | -                         | 74/249 (30%)  | 83   |
| Oligopeptide ABC transporter, oligopeptide-binding protein | LCRIS_00200 D5H0W2       | <i>L. crispatus</i> ST1 60 kDa      | SBP_bac_5                 | 258/539 (48%) | 82   |
| Glutamate tRNA ligase                                      | gltX (LCRIS_00348 D5H1B0 | <i>L. crispatus</i> ST1 58 kDa      | N/A                       | 229/499 (46%) | 76   |
| Phosphonate ABC transporter, phosphonate-binding protein   | phnD1 (LCRIS_000 D5H0C8  | <i>L. crispatus</i> ST1 34 kDa      | -                         | 140/311 (45%) | 76   |
| Glycerol-3-phosphate ABC transporter                       | LCRIS_00593 D5H205       | <i>L. crispatus</i> ST1 48 kDa      | SBP_bac_1                 | 164/434 (38%) | 68   |
| Oligopeptide ABC transporter, oligopeptide-binding protein | oppA2 (LCRIS_013 D5GY99  | <i>L. crispatus</i> ST1 66 kDa      | SBP_bac_5                 | 46/583 (8%)   | 66   |
| Lactocepin S-layer protein                                 | LCRIS_01044 D5H3A6       | <i>L. crispatus</i> ST1 19 kDa      | SLAP (2)                  | 58/166 (35%)  | 57   |
| Oligopeptide ABC transporter, oligopeptide-binding protein | oppA1 (LCRIS_000 D5H0E5  | <i>L. crispatus</i> ST1 66 kDa      | SBP_bac_5                 | 172/586 (29%) | 52   |
| Foldase protein PrsA                                       | prsA (LCRIS_0155 D5GY8   | <i>L. crispatus</i> ST1 33 kDa      | prsA                      | 146/298 (49%) | 52   |
| 30S ribosomal protein S3                                   | rpsC (LCRIS_00304 D5H166 | <i>L. crispatus</i> ST1 25 kDa      | N/A                       | 108/224 (48%) | 47   |
| 30S ribosomal protein S13                                  | rpsM (LCRIS_0032 D5H183  | <i>L. crispatus</i> ST1 13 kDa      | N/A                       | 64/116 (55%)  | 46   |
| Lysin                                                      | LCRIS_01140 D5GXS8       | <i>L. crispatus</i> ST1 42 kDa      | Glyco_hydro_25; SLAP      | 88/385 (23%)  | 45   |
| Putative uncharacterized protein                           | LCRIS_01553 D5GYZ1       | <i>L. crispatus</i> ST1 55 kDa      | Ig/albumin binding        | 146/492 (30%) | 41   |
| Conserved protein                                          | LCRIS_01449 D5GYN7       | <i>L. crispatus</i> ST1 35 kDa      | -                         | 125/329 (38%) | 40   |
| Translation initiation factor IF-3                         | infC (LCRIS_01517 D5GYV5 | <i>L. crispatus</i> ST1 17 kDa      | N/A                       | 68/149 (46%)  | 39   |
| Elongation factor Tu                                       | tufA (LCRIS_00865 D5H2S7 | <i>L. crispatus</i> ST1 44 kDa      | N/A                       | 146/396 (37%) | 38   |
| Phosphonate ABC transporter, phosphonate-binding protein   | phnD2 (LCRIS_001 D5H0Q8  | <i>L. crispatus</i> ST1 34 kDa      | -                         | 130/309 (42%) | 38   |
| 50S ribosomal protein L5                                   | rplE (LCRIS_00310 D5H172 | <i>L. crispatus</i> ST1 20 kDa      | N/A                       | 89/180 (49%)  | 35   |
| 50S ribosomal protein L20                                  | rplT (LCRIS_01515 D5GYV3 | <i>L. crispatus</i> ST1 14 kDa      | N/A                       | 49/118 (42%)  | 33   |
| Aggregation promoting protein                              | LCRIS_01883 D5GZX1       | <i>L. crispatus</i> ST1 13 kDa      | -                         | 32/120 (27%)  | 31   |
| Penicillin-binding protein                                 | LCRIS_00881 D5H2U3       | <i>L. crispatus</i> ST1 39 kDa      | Beta-lactamase            | 113/337 (33%) | 30   |
| 50S ribosomal protein L13                                  | rplM (LCRIS_0032 D5H191  | <i>L. crispatus</i> ST1 17 kDa      | N/A                       | 56/147 (38%)  | 30   |
| Putative uncharacterized protein                           | LCRIS_01470 D5GYQ8       | <i>L. crispatus</i> ST1 22 kDa      | -                         | 65/197 (33%)  | 27   |
| 30S ribosomal protein S17                                  | rpsQ (LCRIS_0030 D5H169  | <i>L. crispatus</i> ST1 11 kDa      | N/A                       | 31/88 (35%)   | 26   |
| 50S ribosomal protein L6                                   | rplF (LCRIS_00313 D5H175 | <i>L. crispatus</i> ST1 19 kDa      | N/A                       | 83/176 (47%)  | 25   |
| Conserved protein                                          | LCRIS_00127 D5H0N9       | <i>L. crispatus</i> ST1 47 kDa      | CAP                       | 98/416 (24%)  | 22   |
| 30S ribosomal protein S11                                  | rpsK (LCRIS_00322 D5H184 | <i>L. crispatus</i> ST1 14 kDa      | N/A                       | 43/129 (33%)  | 21   |
| 50S ribosomal protein L22                                  | rplV (LCRIS_00303 D5H165 | <i>L. crispatus</i> ST1 13 kDa      | N/A                       | 33/117 (28%)  | 20   |
| <b><i>L. crispatus</i> NCK 953</b>                         |                          |                                     |                           |               |      |
| Cell separation protein                                    | LCRIS_00225 D5H0Y7       | <i>L. crispatus</i> ST1 63 kDa      | FIVAR; SLAP (3)           | 428/589 (72%) | 1687 |
| Putative uncharacterized protein                           | LCRIS_00224 D5H0Y6       | <i>L. crispatus</i> ST1 27 kDa      | SLAP                      | 141/250 (56%) | 1041 |
| Conserved protein with bacterial Ig-like domain            | LCRIS_00697 D5H2A9       | <i>L. crispatus</i> ST1 61 kDa      | Big_3; SH3_8              | 336/542 (62%) | 449  |
| Conserved protein with bacterial Ig-like domain            | LCRIS_00705 D5H2B7       | <i>L. crispatus</i> ST1 56 kDa      | Big_3                     | 307/510 (60%) | 307  |
| S-layer protein                                            | LCRIS_01496 D5GYT4       | <i>L. crispatus</i> ST1 44 kDa      | LBA1029                   | 228/393 (58%) | 258  |
| Putative uncharacterized protein                           | LCRIS_00703 D5H2B5       | <i>L. crispatus</i> ST1 29 kDa      | CAP                       | 164/261 (63%) | 217  |
| S-layer protein                                            | LCRIS_01471 D5GYQ9       | <i>L. crispatus</i> ST1 27 kDa      | SLAP                      | 155/259 (60%) | 213  |
| Membrane protein                                           | LCRIS_01714 D5GZF2       | <i>L. crispatus</i> ST1 30 kDa      | -                         | 157/277 (57%) | 182  |
| SlpX                                                       | slpX (LCRIS_00508 D5H150 | <i>L. crispatus</i> ST1 53 kDa      | SLAP                      | 210/491 (43%) | 162  |

|                                                          |                    |        |                         |         |                       |               |      |
|----------------------------------------------------------|--------------------|--------|-------------------------|---------|-----------------------|---------------|------|
| Putative uncharacterized protein                         | LCRIS_00591        | D5H203 | <i>L. crispatus</i> ST1 | 18 kDa  | -                     | 82/165 (50%)  | 156  |
| Fibronectin-binding protein                              | LCRIS_01031        | D5H393 | <i>L. crispatus</i> ST1 | 52 kDa  | fn3                   | 317/460 (69%) | 120  |
| Glyceraldehyde-3-phosphate dehydrogenase                 | gapA (LCRIS_0070)  | D5H2B9 | <i>L. crispatus</i> ST1 | 37 kDa  | N/A                   | 191/338 (57%) | 116  |
| Putative uncharacterized protein                         | LCRIS_01297        | D5GY85 | <i>L. crispatus</i> ST1 | 42 kDa  | SLAP                  | 233/374 (62%) | 102  |
| Penicillin-binding protein                               | LCRIS_00057        | D5H0G9 | <i>L. crispatus</i> ST1 | 39 kDa  | Beta-lactamase        | 251/350 (72%) | 97   |
| Lysin                                                    | LCRIS_01354        | D5GYE2 | <i>L. crispatus</i> ST1 | 44 kDa  | Glyco_hydro_25; SLAP  | 167/412 (41%) | 92   |
| Enolase                                                  | eno (LCRIS_00903)  | D5H2W5 | <i>L. crispatus</i> ST1 | 47 kDa  | N/A                   | 230/428 (54%) | 85   |
| Surface protein                                          | LCRIS_01538        | D5GYX6 | <i>L. crispatus</i> ST1 | 35 kDa  | -                     | 89/325 (27%)  | 78   |
| Elongation factor Tu                                     | tufA (LCRIS_00865) | D5H2S7 | <i>L. crispatus</i> ST1 | 44 kDa  | N/A                   | 205/396 (52%) | 78   |
| Putative uncharacterized protein                         | LCRIS_01612        | D5GZ50 | <i>L. crispatus</i> ST1 | 23 kDa  | -                     | 73/213 (34%)  | 63   |
| Conserved protein                                        | LCRIS_01395        | D5GYI3 | <i>L. crispatus</i> ST1 | 27 kDa  | -                     | 82/249 (33%)  | 53   |
| Conserved protein                                        | LCRIS_01523        | D5GYW1 | <i>L. crispatus</i> ST1 | 19 kDa  | -                     | 96/173 (55%)  | 51   |
| Glycerol-3-phosphate ABC transporter                     | ugpB (LCRIS_0109)  | D5GXN7 | <i>L. crispatus</i> ST1 | 47 kDa  | -                     | 167/425 (39%) | 48   |
| N-acetylmuramidase                                       | LCRIS_00183        | D5H0U5 | <i>L. crispatus</i> ST1 | 45 kDa  | Glucosaminidase; SLAP | 173/408 (42%) | 43   |
| Penicillin-binding protein                               | pbpX (LCRIS_0108)  | D5GXM1 | <i>L. crispatus</i> ST1 | 40 kDa  | Beta-lactamase        | 138/356 (39%) | 31   |
| Penicillin-binding protein                               | LCRIS_00881        | D5H2U3 | <i>L. crispatus</i> ST1 | 39 kDa  | Beta-lactamase        | 120/347 (35%) | 31   |
| <b><i>L. crispatus</i> C26</b>                           |                    |        |                         |         |                       |               |      |
| Putative uncharacterized protein                         | LCRIS_00224        | D5H0Y6 | <i>L. crispatus</i> ST1 | 27 kDa  | SLAP                  | 141/250 (56%) | 1255 |
| Cell separation protein                                  | LCRIS_00225        | D5H0Y7 | <i>L. crispatus</i> ST1 | 63 kDa  | FIVAR; SLAP (3)       | 393/589 (67%) | 886  |
| SlpX                                                     | slpX (LCRIS_00508) | D5H1S0 | <i>L. crispatus</i> ST1 | 53 kDa  | SLAP                  | 306/491 (62%) | 881  |
| Conserved protein with bacterial Ig-like domain          | LCRIS_00697        | D5H2A9 | <i>L. crispatus</i> ST1 | 61 kDa  | Big_3; SH3_8          | 359/542 (66%) | 801  |
| Putative uncharacterized protein                         | LCRIS_00796        | D5H2K8 | <i>L. crispatus</i> ST1 | 105 kDa | SLAP                  | 610/955 (64%) | 543  |
| Conserved protein with bacterial Ig-like domain          | LCRIS_00705        | D5H2B7 | <i>L. crispatus</i> ST1 | 56 kDa  | Big_3                 | 317/510 (62%) | 446  |
| S-layer protein                                          | LCRIS_01496        | D5GYT4 | <i>L. crispatus</i> ST1 | 44 kDa  | LBA1029               | 245/393 (62%) | 365  |
| Conserved protein                                        | LCRIS_01103        | D5GXP1 | <i>L. crispatus</i> ST1 | 79 kDa  | -                     | 355/697 (51%) | 283  |
| S-layer protein                                          | LCRIS_00012        | D5H0C4 | <i>L. crispatus</i> ST1 | 42 kDa  | SLAP                  | 220/368 (60%) | 220  |
| Putative uncharacterized protein                         | LCRIS_00703        | D5H2B5 | <i>L. crispatus</i> ST1 | 29 kDa  | CAP                   | 161/261 (62%) | 188  |
| 50S ribosomal protein L2                                 | rplB (LCRIS_00301) | D5H163 | <i>L. crispatus</i> ST1 | 30 kDa  | N/A                   | 172/278 (62%) | 167  |
| Glycerol-3-phosphate ABC transporter                     | LCRIS_01668        | D5GZA6 | <i>L. crispatus</i> ST1 | 48 kDa  | -                     | 292/433 (67%) | 152  |
| Conserved protein                                        | LCRIS_01395        | D5GYI3 | <i>L. crispatus</i> ST1 | 27 kDa  | -                     | 87/249 (35%)  | 146  |
| Lipoprotein A antigen                                    | bmpA1              | D5H071 | <i>L. crispatus</i> ST1 | 39 kDa  | Bmp                   | 195/364 (54%) | 145  |
| Putative uncharacterized protein                         | LCRIS_00591        | D5H203 | <i>L. crispatus</i> ST1 | 18 kDa  | -                     | 88/165 (53%)  | 138  |
| 50S ribosomal protein L4                                 | rplD (LCRIS_00299) | D5H161 | <i>L. crispatus</i> ST1 | 22 kDa  | N/A                   | 131/205 (64%) | 138  |
| Fibronectin-binding protein                              | LCRIS_01031        | D5H393 | <i>L. crispatus</i> ST1 | 52 kDa  | fn3                   | 276/460 (60%) | 134  |
| 30S ribosomal protein S4                                 | rpsD (LCRIS_0078)  | D5H2J4 | <i>L. crispatus</i> ST1 | 23 kDa  | N/A                   | 145/203 (72%) | 125  |
| S-layer protein                                          | LCRIS_01471        | D5GYQ9 | <i>L. crispatus</i> ST1 | 27 kDa  | SLAP                  | 116/259 (45%) | 123  |
| Elongation factor Tu                                     | tufA (LCRIS_00865) | D5H2S7 | <i>L. crispatus</i> ST1 | 44 kDa  | N/A                   | 198/396 (50%) | 120  |
| 30S ribosomal protein S7                                 | rpsG (LCRIS_0029)  | D5H157 | <i>L. crispatus</i> ST1 | 18 kDa  | N/A                   | 106/156 (68%) | 115  |
| Foldase protein PrsA                                     | prsA (LCRIS_0155)  | D5GY8  | <i>L. crispatus</i> ST1 | 33 kDa  | prsA                  | 187/298 (63%) | 115  |
| 30S ribosomal protein S2                                 | rpsB (LCRIS_0128)  | D5GY73 | <i>L. crispatus</i> ST1 | 29 kDa  | N/A                   | 147/257 (57%) | 103  |
| Elongation factor G                                      | fusA (LCRIS_0029)  | D5H158 | <i>L. crispatus</i> ST1 | 77 kDa  | N/A                   | 295/697 (42%) | 96   |
| 60 kDa chaperonin                                        | groL (LCRIS_00404) | D5H1G6 | <i>L. crispatus</i> ST1 | 58 kDa  | Cpn60_TCP1            | 360/541 (67%) | 96   |
| Putative uncharacterized protein                         | LCRIS_01297        | D5GY85 | <i>L. crispatus</i> ST1 | 42 kDa  | SLAP                  | 214/374 (57%) | 92   |
| 30S ribosomal protein S1                                 | rpsA (LCRIS_0101)  | D5H380 | <i>L. crispatus</i> ST1 | 44 kDa  | N/A                   | 231/402 (57%) | 83   |
| Pyruvate kinase                                          | pyk (LCRIS_01008)  | D5H370 | <i>L. crispatus</i> ST1 | 63 kDa  | N/A                   | 265/589 (45%) | 77   |
| Glutamate tRNA ligase                                    | gltX (LCRIS_00348) | D5H1B0 | <i>L. crispatus</i> ST1 | 58 kDa  | N/A                   | 196/499 (39%) | 71   |
| Lysin                                                    | LCRIS_01961        | D5H049 | <i>L. crispatus</i> ST1 | 34 kDa  | Glyco_hydro_25; SLAP  | 149/316 (47%) | 67   |
| Phosphonate ABC transporter, phosphonate-binding protein | phnD2 (LCRIS_001)  | D5H0Q8 | <i>L. crispatus</i> ST1 | 34 kDa  | -                     | 130/309 (42%) | 67   |
| Penicillin-binding protein                               | LCRIS_00881        | D5H2U3 | <i>L. crispatus</i> ST1 | 39 kDa  | Beta-lactamase        | 130/347 (37%) | 67   |
| DNA gyrase subunit A                                     | gyrA (LCRIS_0000)  | D5H0B8 | <i>L. crispatus</i> ST1 | 92 kDa  | N/A                   | 245/826 (30%) | 64   |
| 30S ribosomal protein S13                                | rpsM (LCRIS_0032)  | D5H183 | <i>L. crispatus</i> ST1 | 13 kDa  | N/A                   | 79/116 (68%)  | 60   |
| Maltose ABC transporter, maltose binding protein         | malE2 (LCRIS_018)  | D5GZY0 | <i>L. crispatus</i> ST1 | 44 kDa  | -                     | 225/408 (55%) | 56   |
| Putative uncharacterized protein                         | LCRIS_01612        | D5GZ50 | <i>L. crispatus</i> ST1 | 23 kDa  | -                     | 57/213 (27%)  | 54   |
| Conserved protein                                        | LCRIS_00127        | D5H0N9 | <i>L. crispatus</i> ST1 | 47 kDa  | CAP                   | 162/416 (39%) | 53   |
| 30S ribosomal protein S17                                | rpsQ (LCRIS_0030)  | D5H169 | <i>L. crispatus</i> ST1 | 11 kDa  | N/A                   | 31/88 (35%)   | 51   |
| 50S ribosomal protein L20                                | rplT (LCRIS_01515) | D5GYV3 | <i>L. crispatus</i> ST1 | 14 kDa  | N/A                   | 50/118 (42%)  | 46   |
| 30S ribosomal protein S3                                 | rpsC (LCRIS_00304) | D5H166 | <i>L. crispatus</i> ST1 | 25 kDa  | N/A                   | 101/224 (45%) | 41   |
| S-layer protein                                          | slp1 (LCRIS_00171) | D5H0T3 | <i>L. crispatus</i> ST1 | 49 kDa  | SLAP                  | 47/466 (10%)  | 40   |
| 30S ribosomal protein S9                                 | rpsI (LCRIS_00330) | D5H192 | <i>L. crispatus</i> ST1 | 14 kDa  | N/A                   | 53/131 (40%)  | 38   |
| Phosphonate ABC transporter, phosphonate-binding protein | phnD1 (LCRIS_000)  | D5H0C8 | <i>L. crispatus</i> ST1 | 34 kDa  | -                     | 108/311 (35%) | 37   |
| 50S ribosomal protein L18                                | rplR (LCRIS_00314) | D5H176 | <i>L. crispatus</i> ST1 | 13 kDa  | N/A                   | 87/118 (74%)  | 37   |
| Translation initiation factor IF-2                       | infB (LCRIS_01272) | D5GY60 | <i>L. crispatus</i> ST1 | 97 kDa  | N/A                   | 191/867 (22%) | 35   |
| Enolase                                                  | eno (LCRIS_00903)  | D5H2W5 | <i>L. crispatus</i> ST1 | 47 kDa  | N/A                   | 120/428 (28%) | 35   |
| Sex pheromone biosynthesis protein                       | LCRIS_00529        | D5H1U1 | <i>L. crispatus</i> ST1 | 42 kDa  | CamS                  | 236/382 (62%) | 34   |
| 50S ribosomal protein L5                                 | rplE (LCRIS_00310) | D5H172 | <i>L. crispatus</i> ST1 | 20 kDa  | N/A                   | 89/180 (49%)  | 33   |
| Glyceraldehyde-3-phosphate dehydrogenase                 | gapA (LCRIS_0070)  | D5H2B9 | <i>L. crispatus</i> ST1 | 37 kDa  | N/A                   | 99/338 (29%)  | 31   |

Figure S1

A

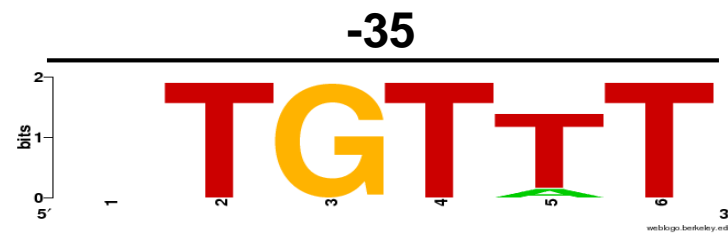

-10

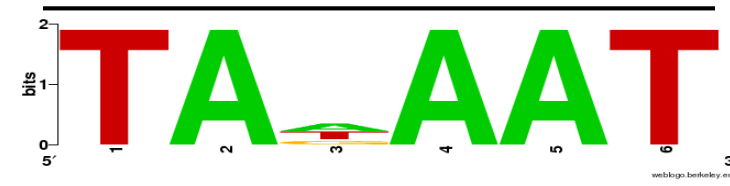

B

|                     | -35    | -10    |
|---------------------|--------|--------|
|                     | NTGTTT | TANAAT |
| <i>L. aci</i> Nmur: | TTGTTT | TAAAAT |
| <i>L. crs</i> Nmur: | TTGTCT | TACAAT |
| <i>L. amy</i> Nmur: | TTGTTT | TACAAT |
| <i>L. hel</i> Nmur: | TTGTTT | TACAAT |
| <i>L. aci</i> BIg3: | TTGTAT | TATAAT |
| <i>L. crs</i> BIg3: | ATGTAT | TATAAT |
| <i>L. amy</i> BIg3: | TTGTAT | TATAAT |
| <i>L. hel</i> BIg3: | TTGTAT | TATAAT |
| <i>L. aci</i> rpoB: | TTGTTT | TAAAAT |
| <i>L. crs</i> rpoB: | TTGTTT | TAAAAT |
| <i>L. amy</i> rpoB: | TTGTTT | TAAAAT |
| <i>L. aci</i> infA: | TTGTAT | TATAAT |
| <i>L. crs</i> infA: | TTGTAT | TATAAT |
| <i>L. hel</i> infA: | TTGTAT | TATAAT |
| <i>L. aci</i> ftsA: | GTGTTT | TAAAAT |
| <i>L. crs</i> ftsA: | CTGTTT | TAGAAT |
| <i>L. hel</i> ftsA: | CTGTTT | TAGAAT |
| <i>L. aci</i> ldhD: | GTGTTT | TATAAT |
| <i>L. crs</i> ldhA: | GTGTTT | TATAAT |
| <i>L. amy</i> ldhD: | GTGTTT | TATAAT |
| <i>L. hel</i> ldhD: | GTGTTT | TATAAT |
| <i>L. crs</i> secA: | TTGTTT | TAGAAT |
| <i>L. amy</i> secA: | TTGTTT | TAGAAT |
| <i>L. hel</i> secA: | ATGTTT | TAAAAT |
| <i>L. aci</i> eno:  | ATGTTT | TAAAAT |
| <i>L. crs</i> eno:  | ATGTTT | TAAAAT |
| <i>L. amy</i> eno:  | ATGTTT | TAAAAT |
| <i>L. hel</i> eno:  | ATGTTT | TAAAAT |
| <i>L. aci</i> lexA: | CTGTTT | TAGAAT |
| <i>L. crs</i> lexA: | CTGTTT | TAGAAT |
| <i>L. amy</i> lexA: | TTGTTT | TAAAAT |
| <i>L. aci</i> slpX: | ATGTTT | TATAAT |
| <i>L. crs</i> slpX: | CTGTTT | TATAAT |
| <i>L. amy</i> slpX: | TTGTTT | TATAAT |

C

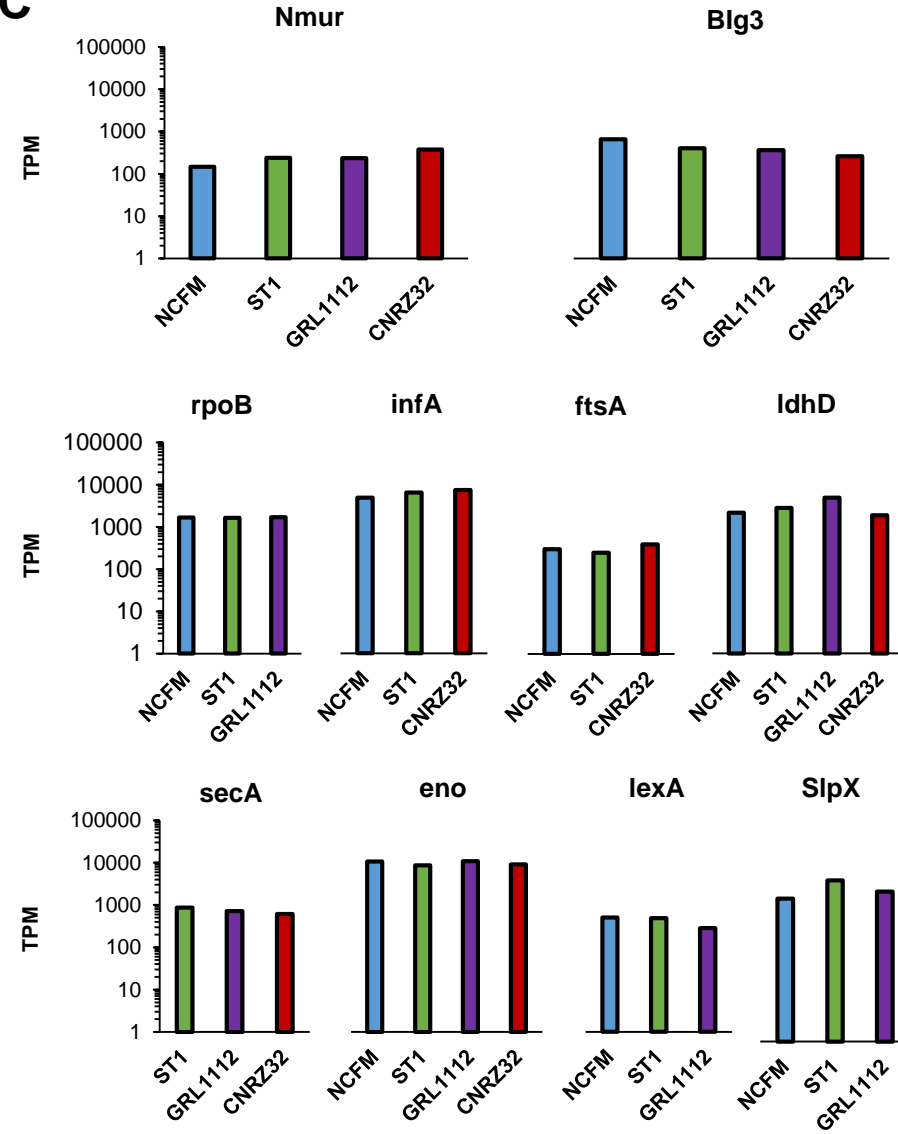

Supplement: AEM.01968-15_zam999116813so1.pdf [file AEM.01968-15_zam999116813so1.pdf]
